# Supplementary material for: Accelerated rates of large-scale mutations in the presence of copper and nickel
Source: PubMed Central journal article supplement — Genome Res. 2019 Jan;29(1):64–73. doi: 10.1101/gr.234724.118 (PMC6314161; doi:10.1101/gr.234724.118), 2019-01
Supplement: supp_gr.234724.118_Supplemental_Fig_S1.pdf [file supp_gr.234724.118_Supplemental_Fig_S1.pdf]

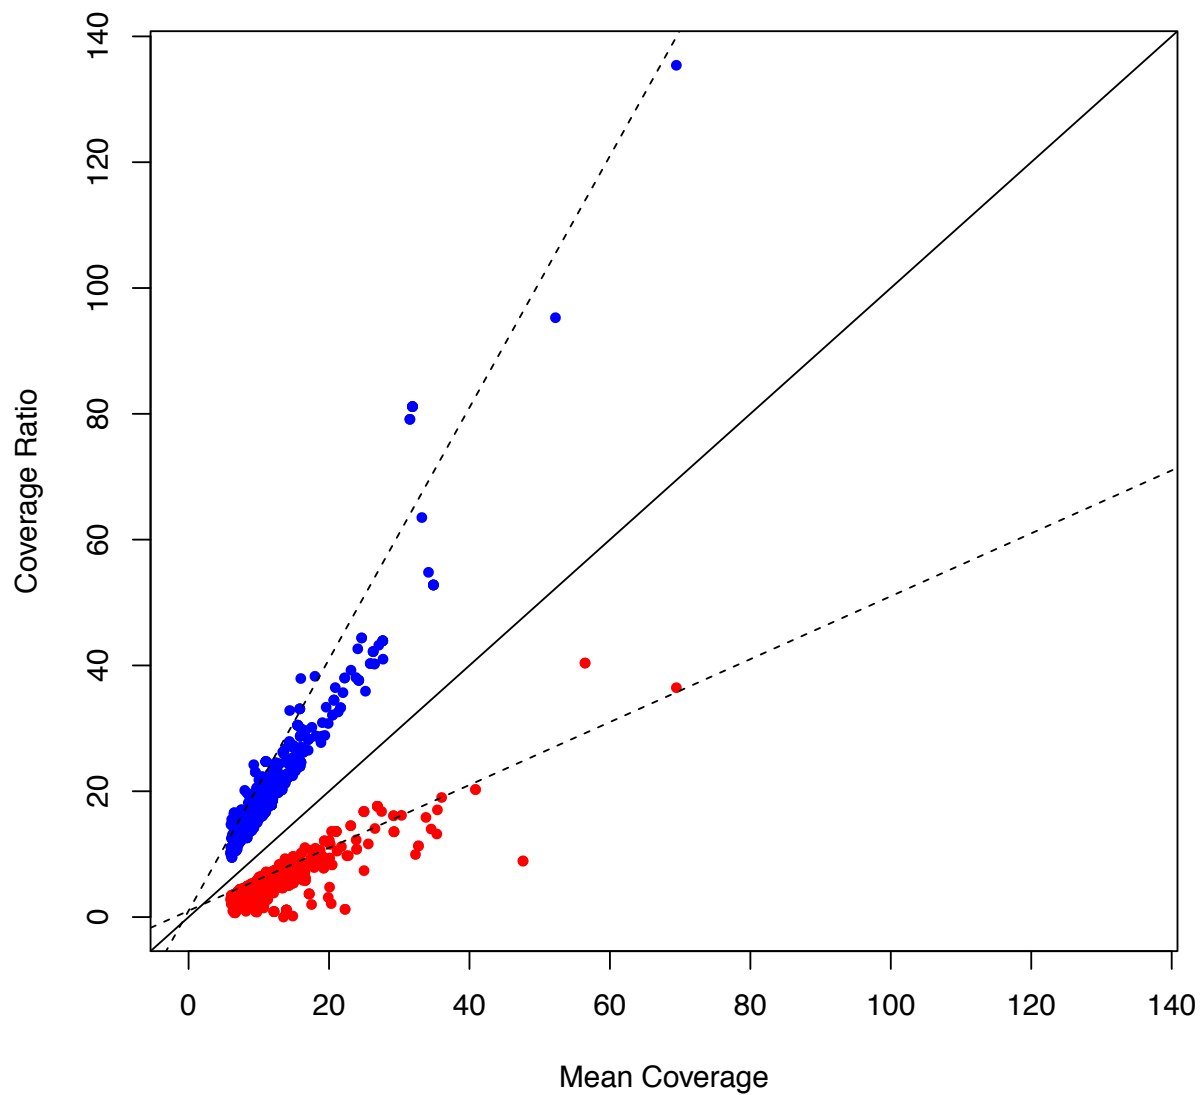

**Supplemental Figure S1. The ratio of the mean depth of coverage between mutants and all other MA lines for duplications (blue) and deletions (red).** The solid line indicates the 1:1 ratio as expected for non-CNVs, the dashed line indicates a 1:2 or 2:1 ratio representing a doubling or halving of copy number.
