# Supplementary material for: Accelerated rates of large-scale mutations in the presence of copper and nickel
Source: PubMed Central journal article supplement — Genome Res. 2019 Jan;29(1):64–73. doi: 10.1101/gr.234724.118 (PMC6314161; doi:10.1101/gr.234724.118), 2019-01
Supplement: supp_gr.234724.118_Supplemental_Fig_S2.pdf [file supp_gr.234724.118_Supplemental_Fig_S2.pdf]

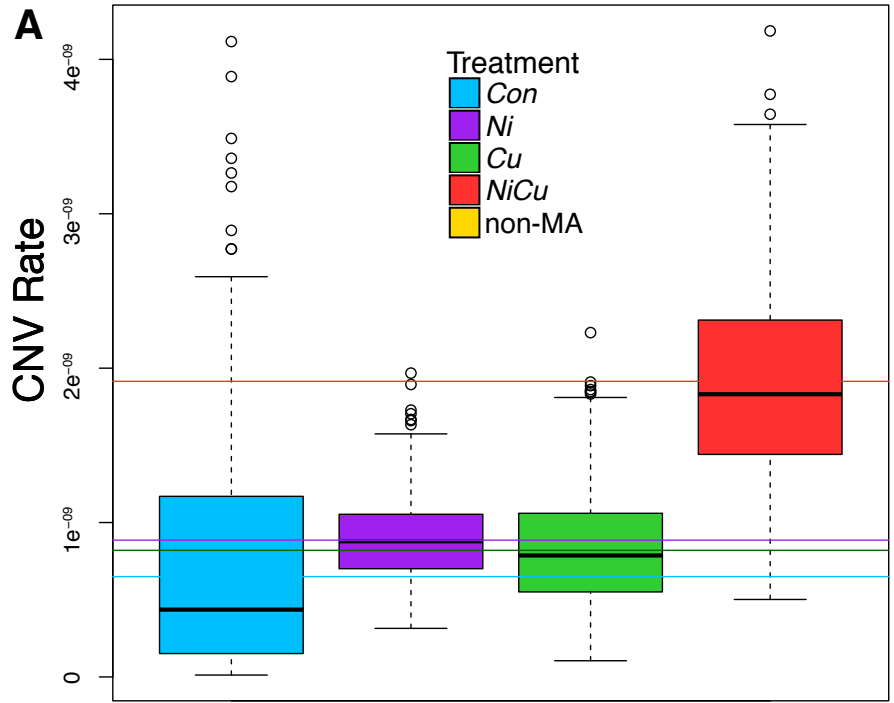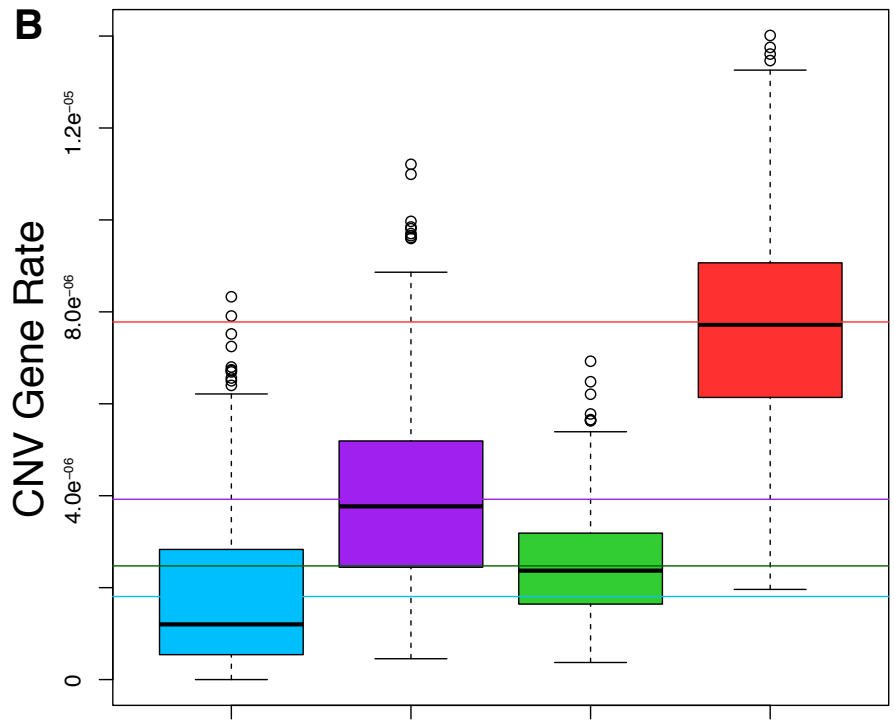

**Supplemental Figure S2. CNV rates after permutation.** CNV rates remain elevated in metal lines after using permutations to randomly sample (with replacement) 9 individuals from each treatment, with the mean indicated by a colored horizontal line. (A) CNV rates per nucleotide per generation and (B) complete gene CNV rates per single-copy gene per generation.
