# Supplementary material for: Accelerated rates of large-scale mutations in the presence of copper and nickel
Source: PubMed Central journal article supplement — Genome Res. 2019 Jan;29(1):64–73. doi: 10.1101/gr.234724.118 (PMC6314161; doi:10.1101/gr.234724.118), 2019-01
Supplement: supp_gr.234724.118_Supplemental_Fig_S3.pdf [file supp_gr.234724.118_Supplemental_Fig_S3.pdf]

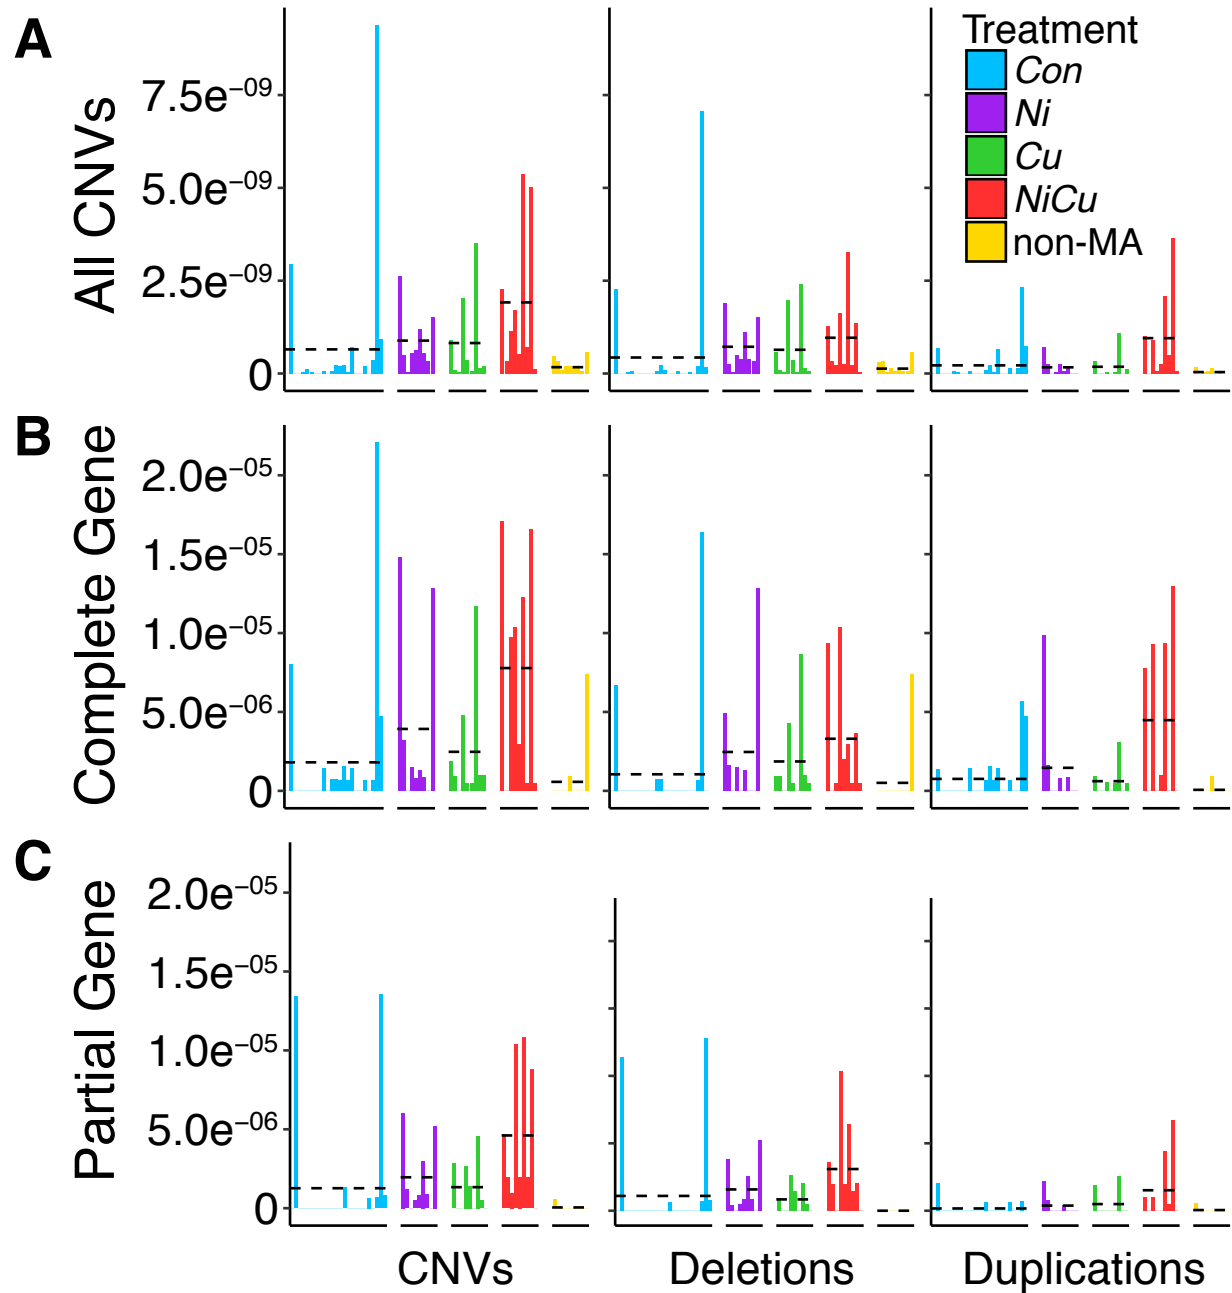

**Supplemental Figure S3. The rate of CNVs across all samples.** (A) CNVs per nucleotide per generation, (B) complete gene CNVs per gene per generation, and (C) partial gene CNVs per gene per generation. The rate for non-MA isolates was calculated using 62 generations (see Supplemental Methods).
