# Supplementary material for: Accelerated rates of large-scale mutations in the presence of copper and nickel
Source: PubMed Central journal article supplement — Genome Res. 2019 Jan;29(1):64–73. doi: 10.1101/gr.234724.118 (PMC6314161; doi:10.1101/gr.234724.118), 2019-01
Supplement: supp_gr.234724.118_Supplemental_Fig_S4.pdf [file supp_gr.234724.118_Supplemental_Fig_S4.pdf]

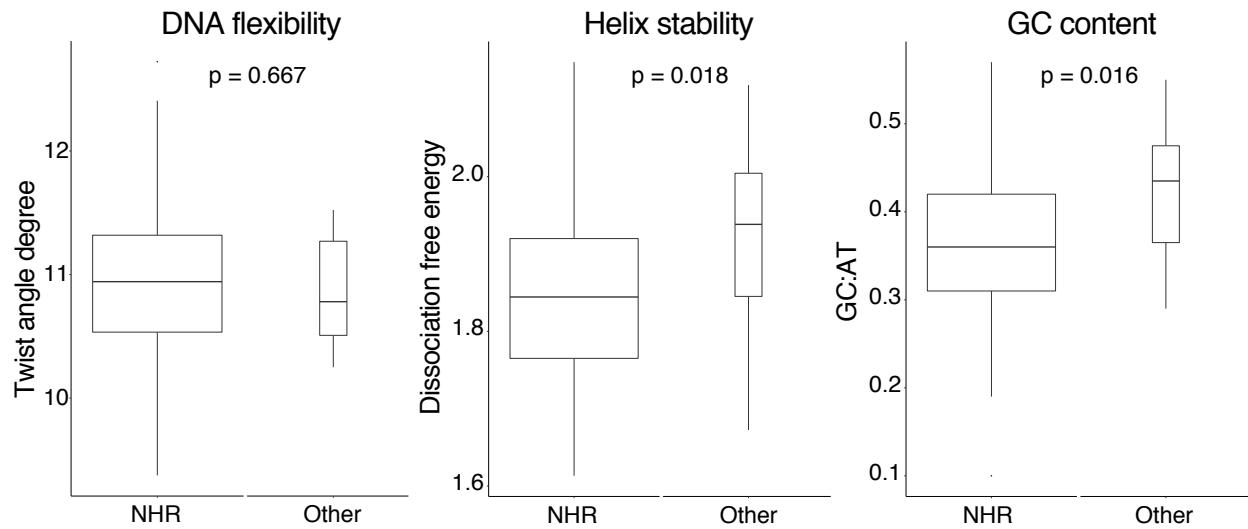

**Supplemental Figure S4. Breakpoint characteristics of nonhomologous recombination (NHR) versus other CNV formation mechanisms.** Physical DNA sequence properties at CNV breakpoint junctions were inferred from reads mapping at breakpoints, giving estimates of DNA flexibility (average twist angle among overlapping dinucleotides), helix stability (average dissociation free energy among overlapping dinucleotides), and GC content (ratio of GC to AT). Breakpoint properties suggest that NHR is associated with fragile sites susceptible to double strand breaks.
