# Supplementary material for: Accelerated rates of large-scale mutations in the presence of copper and nickel
Source: PubMed Central journal article supplement — Genome Res. 2019 Jan;29(1):64–73. doi: 10.1101/gr.234724.118 (PMC6314161; doi:10.1101/gr.234724.118), 2019-01
Supplement: supp_gr.234724.118_Supplemental_Fig_S5.pdf [file supp_gr.234724.118_Supplemental_Fig_S5.pdf]

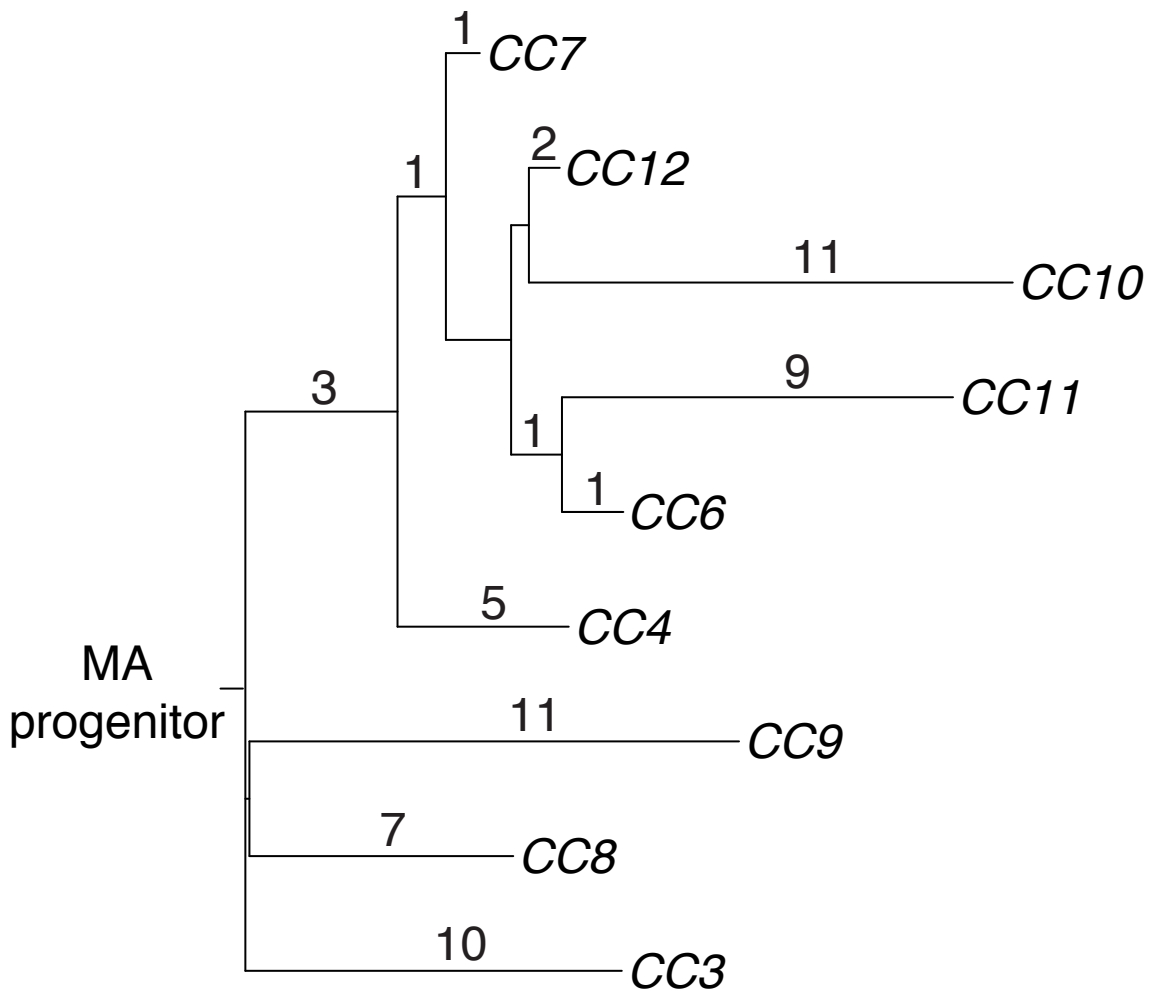

**Supplemental Figure S5. Evolutionary relationship for the non-MA isolates based on single-nucleotide mutations and CNVs.** The total number of mutations (both point mutations and CNVs) mapped onto each branch is shown. The minimum-evolution phylogeny was constructed using the Jukes-Cantor model, treating each deletion as a single mutational event of equal weight to point mutations. The four major lineages that show no early shared mutations were used to calculate the mutation rates for the non-MA isolates.
