# Supplementary material for: Accelerated rates of large-scale mutations in the presence of copper and nickel
Source: PubMed Central journal article supplement — Genome Res. 2019 Jan;29(1):64–73. doi: 10.1101/gr.234724.118 (PMC6314161; doi:10.1101/gr.234724.118), 2019-01
Supplement: supp_gr.234724.118_Supplemental_Fig_S6.pdf [file supp_gr.234724.118_Supplemental_Fig_S6.pdf]

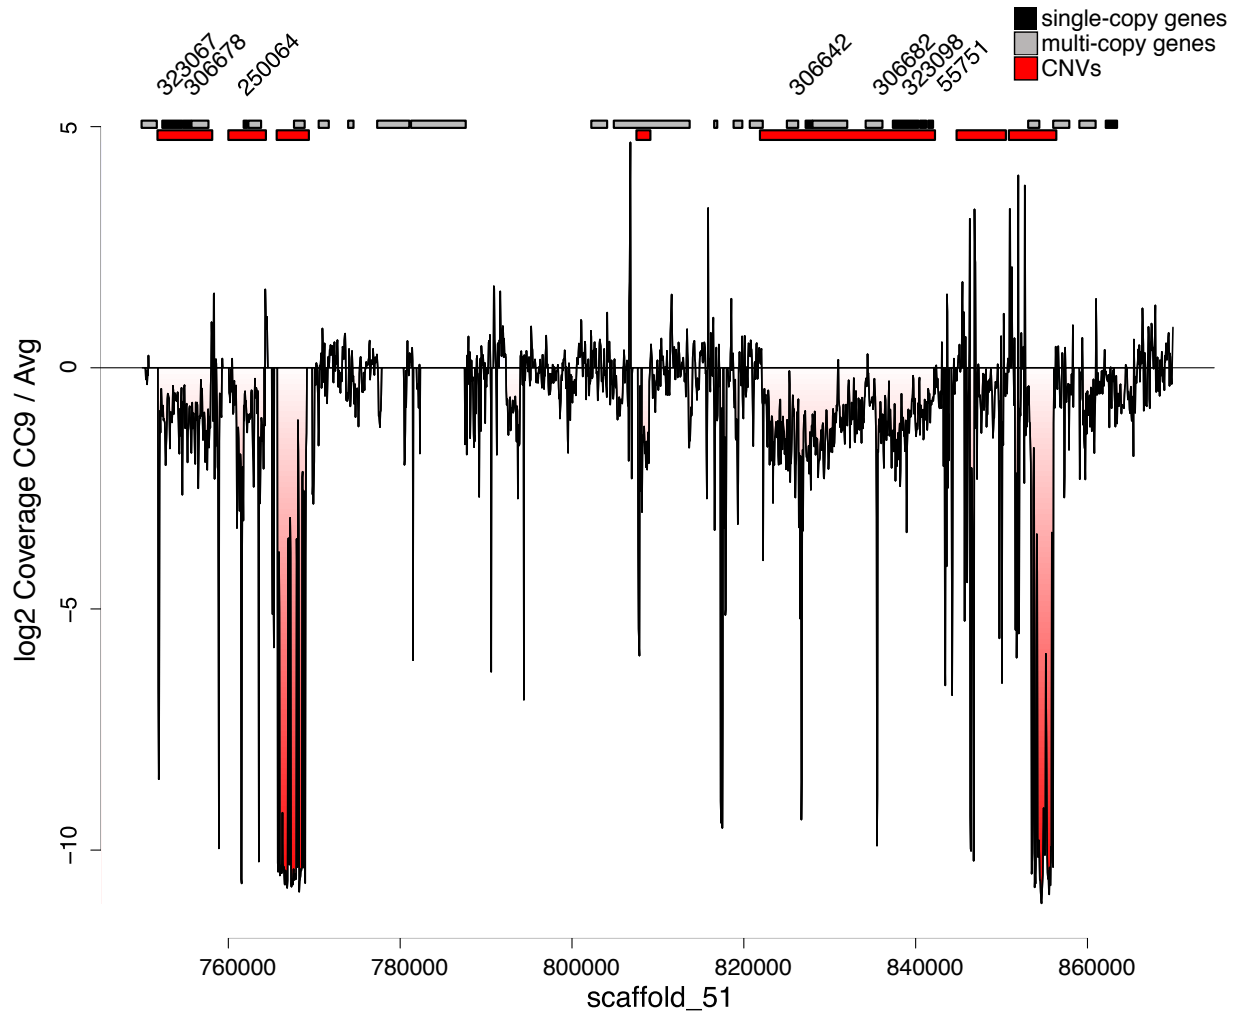

**Supplemental Figure S6. Large deletion region in a non-MA isolate.** The deletion encompasses seven single-copy genes, which are listed without the prefix “DAPPUDRAFT\_”.
