# Supplementary material for: Accelerated rates of large-scale mutations in the presence of copper and nickel
Source: HighWire-hosted journal article supplement (doi:10.1101/gr.234724.118), 2018-11-28
Supplement: Supplemental_Fig_S7.pdf [file Supplemental_Fig_S7.pdf]

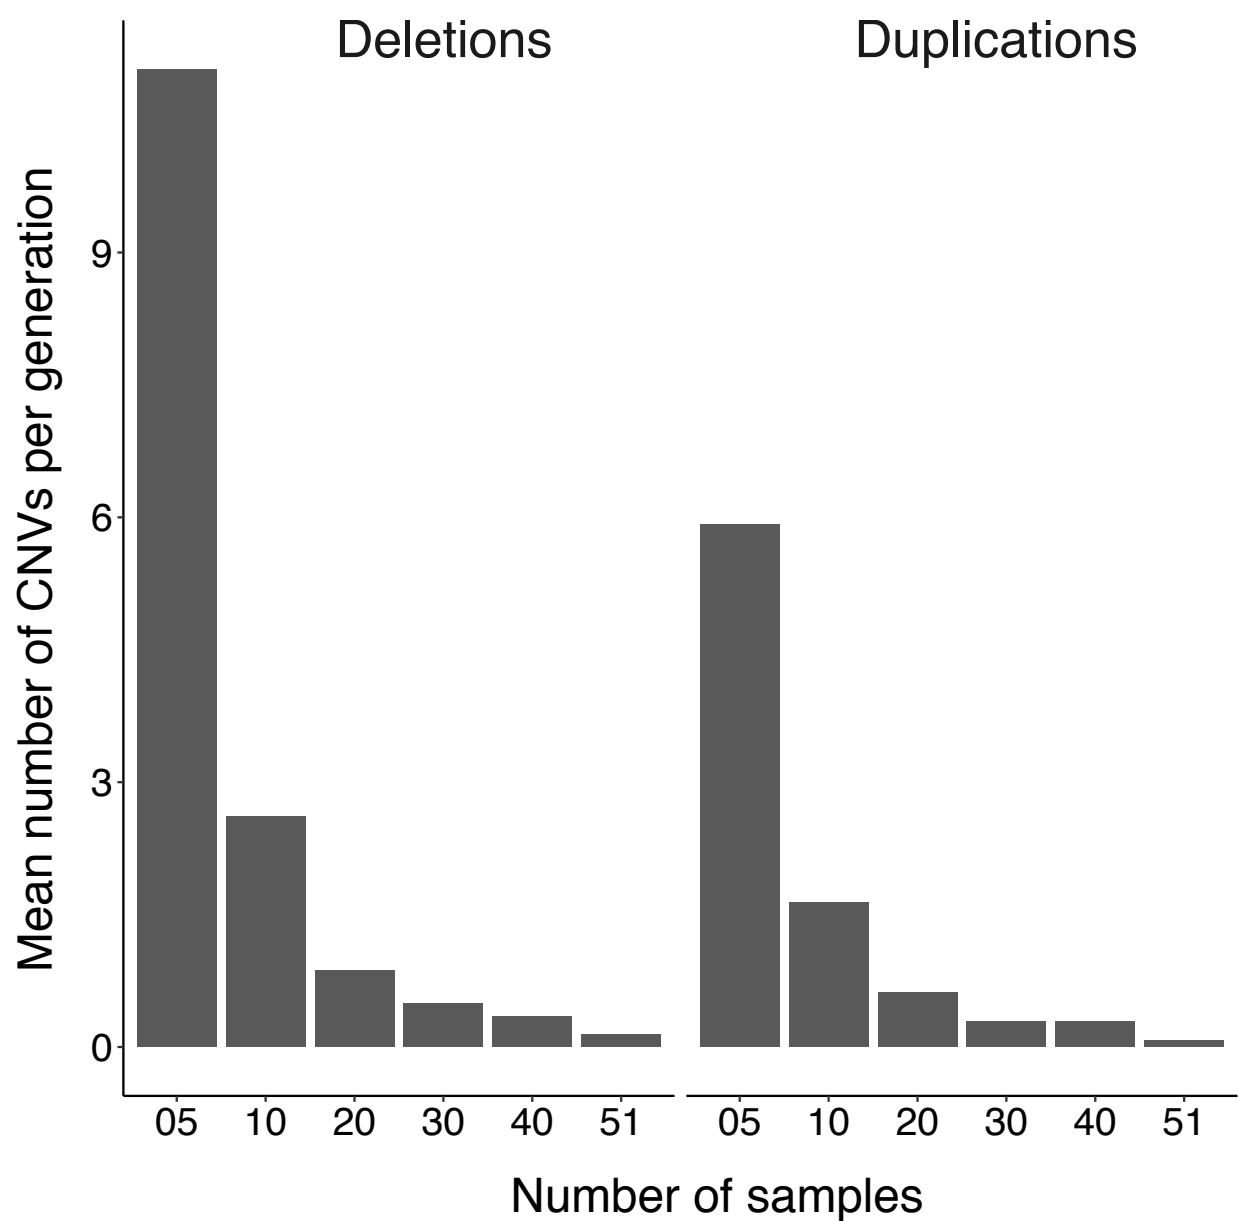

**Supplemental Figure S7. Inverse relationship between the number of MA samples analyzed in pairwise comparisons using CNV-seq and the number of CNVs detected per sample per generation.**
