# Supplementary material for: Accelerated rates of large-scale mutations in the presence of copper and nickel
Source: HighWire-hosted journal article supplement (doi:10.1101/gr.234724.118), 2018-11-28
Supplement: Supplemental_Methods.docx [file Supplemental_Methods.docx]

**Accelerated rates of large-scale mutations in the presence of copper and nickel**

**Supplemental Methods**

*Non-MA population and the life history experiment*

The non-MA population was maintained under the same conditions as the control MA lines (i.e. media, temperature, and lighting), and fed twice a week using the same mixture of algae as the MA lines. To calculate the number of generations reached in the non-MA population, we used a combination of the average age at first reproduction and the average longevity derived from a life history experiment (Bullet al. 2018). The life history experiment was conducted under controlled conditions following the methods of Lynch (Lynch 1985). We used 10 randomly selected non-MA isolates (7 replications per isolate) 1,961 days after the beginning of the experiment. In comparison, the mutation rate estimates were calculated using four unique lineages (C03, C04, C08 and C09), which were collected after 1,368 days of propagation (average MA equivalent generation = 101). The average age at first reproduction was 11.45 days, and the average longevity was 45.91 days. We estimated that the fastest propagating lineage (upper bound) progressed at the rate of the average age at first reproduction (1368 / 11.45 = 120 generations), while the slowest propagating lineage (lower bound) progressed at the rate of the average longevity (1368 / 45.91 = 30 generations). This gives a mean estimate of 120 + 30 / 2 = 75 generations. A more conservative estimate was calculated by weighting clutch sizes based on the reproductive output, assigning more weight to later clutches. The isolates had 4 clutches of mean size 8.57 individuals in the first clutch, 15.34 in the second, 17.28 in the third, and 16.40 in the fourth clutch; the overall output ratio per clutch was 0.15, 0.27, 0.30, and 0.28 respectively. Using the age reached for the later clutches (18.45 days, 25.45 days, and a conservative 45.91 days for the last clutch), the weighted average number of generations = (0.15 × 1368 / 11.45) + (0.27 × 1368 / 18.45) + (0.30 × 1368 / 25.45) + (0.28 × 1368 / 45.91) = 62 generations.

Bull JK, Flynn JM, Chain FJJ, Cristescu ME. 2018. Fitness and genomic consequences of chronic exposure to low levels of copper and nickel in *Daphnia pulex* mutation accumulation lines. *G3: Genes, Genomes, Genetics.* DOI: ﻿10.1534/g3.118.200797

Lynch M. 1985. Spontaneous mutations for life-history characters in an obligate parthenogen. *Evolution* **39**: 804-818.
