# Supplementary material for: Accelerated rates of large-scale mutations in the presence of copper and nickel
Source: HighWire-hosted journal article supplement (doi:10.1101/gr.234724.118), 2018-11-28
Supplement: Supplemental_Table_S1.xlsx [file Supplemental_Table_S1.xlsx]

## Sheet: TableS1
Supplemental Table S1: Mutations among samples including single nucleotide mutations (SNMs), indels, and large copy number variations (CNVs - deletions and duplications). CNVs include total genomic CNVs, CNVs completely overlapping (singleton) genes, CNVs partially overlapping (singleton) genes. Rates of deletion and duplication given the number of generations each sample was propagated and the n…
				Small mut.		CNVs		GeneCNV		Part GeneCNV		Rate of CNVs		Rate of Gene CNVs		Rate of Part. Gene CNVs
Treat.	Sample	Gen.	Depth	SNMs	INDELs	DEL	DUP	DEL	DUP	DEL	DUP	DEL	DUP	DEL	DUP	DEL	DUP
Con	C01	88	23.5	11	0	0	0	0	0	0	0	0	0	0	0	0	0
Con	C02	85	9.1	10	2	44	13	10	2	17	3	2.2865e-09	6.75557e-10	6.70506e-06	1.34101e-06	1.13986e-05	2.01152e-06
Con	C03	80	15.2	5	2	0	0	0	0	0	0	0	0	0	0	0	0
Con	C06	78	13.7	9	0	0	0	0	0	0	0	0	0	0	0	0	0
Con	C07	83	13	10	0	1	0	0	0	0	0	5.32181e-11	0	0	0	0	0
Con	C08	80	12	20	0	1	1	0	0	0	0	5.52138e-11	5.52138e-11	0	0	0	0
Con	C12	86	13.1	7	0	0	1	0	0	0	0	0	5.13617e-11	0	0	0	0
Con	C13	85	14.1	19	0	0	0	0	0	0	0	0	0	0	0	0	0
Con	C14	77	14.7	12	1	0	0	0	0	0	0	0	0	0	0	0	0
Con	C16	79	14.4	8	0	0	1	0	2	0	0	0	5.59127e-11	0	1.44286e-06	0	0
Con	C17	86	14.6	7	4	0	0	0	0	0	0	0	0	0	0	0	0
Con	C18	79	11.9	11	0	1	0	1	0	0	0	5.59127e-11	0	7.21431e-07	0	0	0
Con	C20	81	10.5	9	1	4	0	1	0	0	0	2.18129e-10	0	7.03618e-07	0	0	0
Con	C21	88	12.1	13	0	2	2	0	1	1	1	1.00389e-10	1.00389e-10	0	6.47648e-07	6.47648e-07	6.47648e-07
Con	C24	73	10.9	13	1	0	4	0	2	0	0	0	2.42033e-10	0	1.56145e-06	0	0
Con	C25	87	10.9	21	0	0	1	0	1	0	0	0	5.07713e-11	0	6.55092e-07	0	0
Con	C34	80	10.5	8	3	1	12	0	2	0	0	5.52138e-11	6.62566e-10	0	1.42483e-06	0	0
Con	C35	88	22.2	15	0	0	0	0	0	0	0	0	0	0	0	0	0
Con	C36	83	13.5	12	2	0	0	0	0	0	0	0	0	0	0	0	0
Con	C37	87	12.3	18	0	1	3	0	1	0	1	5.07713e-11	1.52314e-10	0	6.55092e-07	0	6.55092e-07
Con	C38	84	12.5	15	0	0	0	0	0	0	0	0	0	0	0	0	0
Con	C39	85	10.3	13	1	4	3	1	0	1	0	2.07864e-10	1.55898e-10	6.70506e-07	0	6.70506e-07	0
Con	C40	80	10.9	10	2	127	42	23	8	18	1	7.01215e-09	2.31898e-09	1.63855e-05	5.6993e-06	1.28234e-05	7.12413e-07
Con	C44	72	11	14	1	3	12	0	6	1	0	1.84046e-10	7.36184e-10	0	4.74942e-06	7.9157e-07	0
Ni	C151	104	15.5	47	1	45	17	9	18	7	4	1.91125e-09	7.22027e-10	4.93209e-06	9.86418e-06	3.83607e-06	2.19204e-06
Ni	C155	143	10.9	29	1	8	8	4	4	1	2	2.47111e-10	2.47111e-10	1.59421e-06	1.59421e-06	3.98553e-07	7.97106e-07
Ni	C167	130	11.8	29	0	1	0	0	0	0	0	3.39777e-11	0	0	0	0	0
Ni	C170	113	15.9	36	1	13	1	3	0	1	0	5.08162e-10	3.90894e-11	1.51309e-06	0	5.04363e-07	0
Ni	C171	139	11.5	6	0	12	8	0	2	2	0	3.81333e-10	2.54222e-10	0	8.20044e-07	8.20044e-07	0
Ni	C178	133	15.3	46	3	34	2	3	0	6	1	1.12918e-09	6.64226e-11	1.28556e-06	0	2.57111e-06	4.28519e-07
Ni	C181	133	11.6	15	0	12	5	0	2	2	0	3.98536e-10	1.66057e-10	0	8.57038e-07	8.57038e-07	0
Ni	C182	128	9.1	18	4	10	0	0	0	0	0	3.45086e-10	0	0	0	0	0
Ni	C187	142	9.2	25	0	49	0	32	0	13	0	1.52421e-09	0	1.28435e-05	0	5.21767e-06	0
Cu	C251	121	11.8	12	2	16	9	2	2	2	4	5.8408e-10	3.28545e-10	9.42034e-07	9.42034e-07	9.42034e-07	1.88407e-06
Cu	C254	123	12.2	23	0	3	0	2	0	0	0	1.07734e-10	0	9.26716e-07	0	0	0
Cu	C256	117	13	19	0	1	0	0	0	0	0	3.7753e-11	0	0	0	0	0
Cu	C280	107	13.5	16	0	48	1	8	1	5	0	1.9815e-09	4.12813e-11	4.26116e-06	5.32645e-07	2.66323e-06	0
Cu	C281	121	9	19	2	10	0	1	0	3	0	3.6505e-10	0	4.71017e-07	0	1.41305e-06	0
Cu	C284	121	9.4	24	1	1	1	0	1	0	0	3.6505e-11	3.6505e-11	0	4.71017e-07	0	0
Cu	C291	112	12.3	26	0	61	28	17	6	4	5	2.40574e-09	1.10428e-09	8.65073e-06	3.0532e-06	2.03547e-06	2.54433e-06
Cu	C299	114	10.8	16	0	4	0	2	0	1	0	1.54986e-10	0	9.99878e-07	0	4.99939e-07	0
Cu	C300	113	12.5	20	0	2	3	1	1	0	0	7.81788e-11	1.17268e-10	5.04363e-07	5.04363e-07	0	0
NiCu	C352	110	10.4	19	1	32	25	18	15	7	2	1.28498e-09	1.00389e-09	9.32613e-06	7.77178e-06	3.62683e-06	1.03624e-06
NiCu	C355	118	10.3	12	1	9	0	0	0	4	0	3.36898e-10	0	0	0	1.93197e-06	0
NiCu	C364	117	12.1	12	1	6	24	1	19	0	2	2.26518e-10	9.06073e-10	4.8712e-07	9.25528e-06	0	9.7424e-07
NiCu	C372	121	12.3	16	1	45	2	22	0	22	0	1.64272e-09	7.301e-11	1.03624e-05	0	1.03624e-05	0
NiCu	C374	115	12.7	12	0	7	7	4	2	4	0	2.68867e-10	2.68867e-10	1.98237e-06	9.91183e-07	1.98237e-06	0
NiCu	C376	116	11.1	13	0	86	55	6	19	13	9	3.27475e-09	2.09432e-09	2.94792e-06	9.33507e-06	6.38715e-06	4.42187e-06
NiCu	C378	117	10.2	16	2	6	13	1	0	3	1	2.26518e-10	4.90789e-10	4.8712e-07	0	1.46136e-06	4.8712e-07
NiCu	C380	110	12	18	0	34	91	7	25	4	13	1.36529e-09	3.65415e-09	3.62683e-06	1.2953e-05	2.07247e-06	6.73554e-06
NiCu	C391	116	10.7	13	1	1	2	1	0	0	0	3.80785e-11	7.6157e-11	4.91319e-07	0	0	0
nonMA	CC3	62	16.5	7	0	2	1	0	0	0	0	1.42487e-10	7.12436e-11	0	0	0	0
nonMA	CC4	62	15.2	5	0	1	2	0	1	0	0	7.12436e-11	1.42487e-10	0	5.6993e-07	0	0
nonMA	CC6	62	16.4	4	0	2	0	0	0	0	0	1.42487e-10	0	0	0	0	0
nonMA	CC7	62	16.9	3	0	1	1	0	0	0	0	7.12436e-11	7.12436e-11	0	0	0	0
nonMA	CC8	62	17.4	6	0	1	0	0	0	0	0	7.12436e-11	0	0	0	0	0
nonMA	CC9	62	19.8	3	0	8	0	8	0	0	0	5.69949e-10	0	4.55944e-06	0	0	0
nonMA	CC10	75	15.8	4	0	7	4	0	0	0	1	4.12263e-10	2.35579e-10	0	0	0	4.22171e-07
nonMA	CC11	75	15.1	6	0	8	0	0	0	0	0	4.71158e-10	0	0	0	0	0
nonMA	CC12	75	13.3	4	0	1	1	0	0	0	0	5.88947e-11	5.88947e-11	0	0	0	0
