# Supplementary material for: Accelerated rates of large-scale mutations in the presence of copper and nickel
Source: HighWire-hosted journal article supplement (doi:10.1101/gr.234724.118), 2018-11-28
Supplement: Supplemental_Table_S2.xlsx [file Supplemental_Table_S2.xlsx]

## Sheet: TableS2
Supplemental Table S2: List of mutations detected, including results from CNV breakpoint analysis when available with the mechanism of formation, inferred breakpoints, DNA properties (flexibility, GC content, helix stability) and microhomologies.
Scaffold	Start	End	Sample	Type	Mechanism	Breakpoint Start	Breakpoint End	Flex	GC	Helix	NumMicrohomologies	Microhomology
scaffold_1	45676	45677	C06	SNP
scaffold_1	118861	118862	C171	SNP
scaffold_1	197121	197122	C182	SNP
scaffold_1	252500	254000	C02	deletion	NHR	251940	255648	11.2133	0.35	1.83878	2	GT
scaffold_1	498336	498337	C364	SNP
scaffold_1	533092	533093	C151	SNP
scaffold_1	550987	550988	C155	SNP
scaffold_1	816755	816756	C178	SNP
scaffold_1	838076	838077	C25	SNP
scaffold_1	852375	854500	C02	deletion	NHR	851159	853680	10.8214	0.41	1.81837	0	-
scaffold_1	931624	933375	C02	deletion
scaffold_1	959243	959244	C284	SNP
scaffold_1	1076197	1076198	CC3	SNP
scaffold_1	1130318	1130319	C187	SNP
scaffold_1	1166250	1168250	C187	deletion
scaffold_1	1191634	1191635	C299	SNP
scaffold_1	1311696	1311697	CC11	SNP
scaffold_1	1337526	1337527	C170	SNP
scaffold_1	1337537	1337538	C170	SNP
scaffold_1	1600835	1600836	C37	SNP
scaffold_1	1751125	1760500	CC7	duplication	NAHR
scaffold_1	1844652	1844653	C187	SNP
scaffold_1	1913702	1913703	CC9	SNP
scaffold_1	1913702	1913703	C18	SNP
scaffold_1	1948270	1948271	C21	SNP
scaffold_1	2229649	2229650	C44	SNP
scaffold_1	2269500	2271750	C372	deletion
scaffold_1	2365970	2365971	C256	SNP
scaffold_1	2464527	2464528	C178	SNP
scaffold_1	2476249	2476250	C02	SNP
scaffold_1	2681875	2681876	C256	SNP
scaffold_1	2733144	2733145	C38	SNP
scaffold_1	2751893	2751894	C187	SNP
scaffold_1	2755028	2755029	C06	SNP
scaffold_1	2796469	2796470	C14	SNP
scaffold_1	2912875	2912876	C182	SNP
scaffold_1	2917125	2920375	C372	deletion	NHR	2917787	2920706	10.5224	0.32	1.81633	3	CTT
scaffold_1	3073235	3073236	C14	SNP
scaffold_1	3108375	3110250	C178	deletion
scaffold_1	3383367	3383368	C167	SNP
scaffold_1	3397000	3398750	C02	deletion	NHR	3396466	3398410	11.2439	0.35	1.86531	0	-
scaffold_1	3432244	3432245	C374	SNP
scaffold_1	3454062	3454063	C151	SNP
scaffold_1	3454480	3454481	C44	SNP
scaffold_1	3535008	3535009	C03	SNP
scaffold_1	3579089	3579090	C171	SNP
scaffold_1	3590125	3592875	C378	duplication
scaffold_1	3600436	3600437	C178	SNP
scaffold_1	3802739	3802740	C167	SNP
scaffold_1	3856862	3856863	C155	SNP
scaffold_1	3875625	3882000	C372	deletion
scaffold_1	3880639	3880640	C291	SNP
scaffold_1	3967242	3967243	C13	SNP
scaffold_1	4005089	4005090	C254	SNP
scaffold_1	4175250	4192875	C171	duplication
scaffold_1	4175625	4189750	C181	duplication
scaffold_1	4189569	4189570	C181	SNP
scaffold_10	24614	24615	C34	SNP
scaffold_10	44875	49750	C40	duplication	NAHR									1
scaffold_10	45125	49500	C376	deletion	NHR	46145	49751	10.2827	0.45	1.91633	3	AAC
scaffold_10	96181	96182	C380	SNP
scaffold_10	223125	226875	C281	deletion	NHR	223225	226912	9.93163	0.48	2.00306	0	-
scaffold_10	323749	325875	C02	deletion
scaffold_10	352625	355125	C376	deletion
scaffold_10	425000	432000	C40	deletion
scaffold_10	425000	431875	C376	duplication										1
scaffold_10	505000	506000	C376	deletion	NAHR	501896	505803	10.5102	0.48	1.99796	0	-
scaffold_10	571500	573375	C40	deletion	NHR	572132	572965	11.6255	0.36	1.84082	2	TC
scaffold_10	577024	577025	C284	SNP
scaffold_10	599625	602875	C40	duplication
scaffold_10	601250	602875	C376	deletion	NHR	600022	602463	11.0276	0.31	1.84592	0	-
scaffold_10	643000	648000	C40	deletion
scaffold_10	647375	650250	C376	deletion	NHR	647891	650284	10.8673	0.32	1.78469	1	A
scaffold_10	678625	680875	C40	deletion	NHR	676717	684003	10.4418	0.39	1.90714	0	-
scaffold_10	756625	758250	C376	deletion	NHR	755996	759201	11.8582	0.28	1.74082	0	-
scaffold_10	758125	759875	C40	deletion	NHR	754762	761406	10.6204	0.33	1.90102	0	-
scaffold_10	764750	769500	C376	deletion	NAHR	764851	769799	10.6684	0.44	2.00204	0	-
scaffold_10	770000	775625	C155	deletion
scaffold_10	770500	776500	C376	duplication
scaffold_10	771375	776875	C40	deletion
scaffold_10	787500	792625	C40	deletion
scaffold_10	795500	807625	C376	duplication
scaffold_10	798625	806750	C40	deletion
scaffold_10	817500	819125	C376	deletion	NHR	817848	820352	11.3122	0.31	1.79082	1	A
scaffold_10	856375	862500	C40	deletion	NHR	858088	862282	10.7633	0.3	1.9	4	CAAC
scaffold_10	856625	863875	C376	duplication
scaffold_10	865500	869000	C280	deletion	NHR	865024	872951	9.89286	0.53	1.99082	0	-
scaffold_10	873750	878125	C376	duplication
scaffold_10	874250	876250	C40	deletion
scaffold_10	885500	890750	C376	deletion
scaffold_10	886375	891500	C40	duplication
scaffold_10	897237	897238	C39	SNP
scaffold_10	930023	930024	C36	SNP
scaffold_10	938375	940500	C40	deletion
scaffold_10	947750	949750	C40	duplication
scaffold_10	974625	978875	C40	deletion	NHR	974885	978501	11.0735	0.3	1.81837	0	-
scaffold_10	987000	995250	C40	duplication	NAHR
scaffold_10	988875	990500	C376	deletion	NAHR	988110	993307	11.5224	0.38	1.8449	3	TAT
scaffold_10	990500	993500	C376	deletion
scaffold_10	1069750	1072125	C40	deletion	NHR	1069626	1073461	11.0429	0.25	1.73367	0	-
scaffold_10	1077125	1082625	C376	duplication
scaffold_10	1077375	1082500	C40	deletion	NHR	1076895	1081884	11.5755	0.35	1.79286	2	TT
scaffold_10	1100125	1107125	C40	deletion	NHR	1101602	1104465	10.5133	0.3	1.76939	3	AAA
scaffold_10	1109375	1116500	C40	duplication
scaffold_10	1110000	1116625	C376	deletion	NHR	1110483	1116855	10.5949	0.46	1.99286	1	A
scaffold_10	1120127	1120128	C25	SNP
scaffold_10	1122750	1127500	C40	deletion
scaffold_10	1122750	1127625	C376	duplication
scaffold_10	1127875	1133000	C376	duplication
scaffold_10	1201744	1201745	C25	SNP
scaffold_10	1201875	1206500	C376	duplication
scaffold_10	1202375	1206250	C40	deletion
scaffold_10	1214125	1217875	C40	deletion	NHR	1214441	1218057	11.1204	0.45	1.84082	0	-
scaffold_10	1214125	1222875	C376	duplication
scaffold_10	1222625	1224500	C376	deletion
scaffold_10	1242125	1248875	C40	deletion
scaffold_10	1266875	1271375	C376	deletion	NHR	1268644	1271208	11.549	0.41	1.88163	4	ACGT
scaffold_10	1267000	1271375	C40	duplication
scaffold_10	1272173	1272174	C170	SNP
scaffold_10	1283500	1285750	C40	deletion	NHR	1283821	1286519	11.7735	0.28	1.72959	2	AT
scaffold_10	1291375	1292875	C182	deletion
scaffold_10	1301750	1306625	C376	duplication
scaffold_10	1302500	1307000	C40	deletion
scaffold_10	1337250	1339875	C40	deletion
scaffold_10	1362250	1370750	C352	deletion
scaffold_10	1378250	1381000	C376	deletion
scaffold_10	1387375	1390500	C374	deletion	NHR	1383545	1400799	11.1663	0.36	1.92245	0	-
scaffold_10	1390500	1399125	C374	deletion
scaffold_10	1506500	1529125	C254	deletion	NHR	1506564	1528826	10.5388	0.41	1.87347	0	-
scaffold_10	1531375	1536375	CC11	deletion	NHR	1531643	1537856	11.0071	0.37	1.83061	0	-
scaffold_10	1531375	1535000	CC6	deletion	NHR	1530476	1533987	10.3398	0.33	1.75918	0	-
scaffold_10	1531375	1536250	C40	duplication
scaffold_10	1531500	1536000	CC10	deletion	NHR	1531745	1533779	11.048	0.44	1.87041	0	-
scaffold_10	1531500	1534375	CC12	deletion
scaffold_10	1532000	1535000	CC7	deletion
scaffold_10	1602750	1607625	C380	duplication
scaffold_10	1603500	1611000	C155	deletion
scaffold_10	1603500	1611000	CC10	deletion
scaffold_10	1603500	1609250	C364	duplication
scaffold_10	1671942	1671943	C25	SNP
scaffold_10	1738250	1746500	C374	deletion	NHR	1738297	1744885	11.1459	0.34	1.80204	0	-
scaffold_10	1747250	1753125	C374	deletion	NHR	1747340	1752950	11.449	0.2	1.70306	0	-
scaffold_10	1822750	1824625	C187	deletion
scaffold_10	1849931	1849932	C21	SNP
scaffold_10	1864250	1868000	C170	deletion
scaffold_10	1870875	1872500	C40	deletion
scaffold_10	1887750	1890125	C40	deletion	NHR	1886683	1889408	10.4561	0.27	1.79898	3	AAA
scaffold_10	1898500	1904750	C40	deletion
scaffold_10	1899375	1907625	C376	duplication
scaffold_10	1907375	1909625	C376	deletion	NHR	1907348	1910940	11.5122	0.3	1.74184	0	-
scaffold_10	1979500	1982250	C376	deletion
scaffold_10	2056625	2061500	C251	duplication
scaffold_10	2124750	2127125	C40	deletion
scaffold_10	2132750	2136625	C376	duplication
scaffold_10	2133250	2136375	C40	deletion
scaffold_10	2146625	2147500	C376	deletion
scaffold_100	144334	144335	C171	SNP
scaffold_100	184874	184875	C376	SNP
scaffold_100	263448	263449	C391	SNP
scaffold_100	411506	411507	C254	SNP
scaffold_100	425246	425247	C08	SNP
scaffold_100	430153	430154	C291	SNP
scaffold_101	93725	93726	C36	INDEL
scaffold_101	100624	101625	C02	deletion	NHR	98698	103475	9.92347	0.48	2.07245	0	-
scaffold_101	441513	441514	C284	SNP
scaffold_101	466930	466931	C167	SNP
scaffold_102	242125	245875	C376	duplication
scaffold_102	291934	291935	C178	SNP
scaffold_102	291935	291936	C178	SNP
scaffold_102	305500	306750	C380	duplication										1
scaffold_102	365375	367000	C280	deletion
scaffold_102	367500	370750	C280	deletion
scaffold_102	395250	400000	C40	duplication
scaffold_102	396000	404625	C34	duplication
scaffold_102	400000	405125	C40	duplication										1
scaffold_102	400375	405375	C376	deletion
scaffold_102	405125	407750	C40	deletion
scaffold_102	405875	407750	C376	duplication										1
scaffold_103	8000	18125	C364	duplication
scaffold_103	198375	203000	C34	duplication	NAHR
scaffold_103	253875	257875	CC4	duplication
scaffold_1037	34581	34582	C02	SNP
scaffold_104	228125	230875	C372	deletion
scaffold_104	317125	319375	C251	deletion
scaffold_104	374500	387750	C44	duplication
scaffold_104	428561	428562	C170	SNP
scaffold_105	302270	302271	C376	SNP
scaffold_105	369890	369891	C155	SNP
scaffold_1050	11897	11898	C02	INDEL
scaffold_106	136639	136640	C181	SNP
scaffold_106	168338	168339	C167	SNP
scaffold_106	208044	208045	C18	SNP
scaffold_106	236374	238250	C02	deletion
scaffold_107	4375	11375	C21	deletion
scaffold_107	4375	11375	C44	deletion
scaffold_107	189128	189129	C01	SNP
scaffold_107	228439	228440	C38	SNP
scaffold_108	25250	28250	CC4	deletion	NHR	26176	28073	9.87449	0.5	2.05408	2	TC
scaffold_108	42125	49125	C364	duplication
scaffold_108	59625	64000	C02	duplication
scaffold_108	168375	171750	C376	deletion
scaffold_108	324750	338250	C24	duplication
scaffold_109	109875	113500	CC8	deletion	NHR	109470	113892	10.9878	0.38	1.86327	0	-
scaffold_109	273887	273888	C35	SNP
scaffold_109	282250	294750	C170	deletion	NHR	286907	288585	12.1673	0.23	1.70918	2	AA
scaffold_109	282250	294750	C254	deletion	NHR	286907	288585	12.1673	0.23	1.70918	2	AA
scaffold_109	300250	303500	C291	duplication
scaffold_109	396625	401500	C372	deletion	NHR	394915	405152	11.1071	0.42	1.84184	0	-
scaffold_1094	10986	10987	C170	SNP
scaffold_11	122229	122230	C20	SNP
scaffold_11	191386	191387	C364	SNP
scaffold_11	191387	191388	C364	SNP
scaffold_11	294479	294480	C18	SNP
scaffold_11	443853	443854	C14	SNP
scaffold_11	626835	626836	C300	SNP
scaffold_11	786808	786809	C181	SNP
scaffold_11	811912	811913	C08	SNP
scaffold_11	850029	850030	C14	SNP
scaffold_11	1047125	1050500	C372	deletion	NHR	1046601	1049474	11.3582	0.39	1.87755	5	TCCAT
scaffold_11	1070790	1070791	C378	SNP
scaffold_11	1229250	1231875	C151	deletion
scaffold_11	1310114	1310115	C391	INDEL
scaffold_11	1340672	1340673	C299	SNP
scaffold_11	1358108	1358109	C284	SNP
scaffold_11	1517827	1517828	C284	SNP
scaffold_11	1519875	1525000	C151	deletion
scaffold_11	1684250	1685875	C376	deletion
scaffold_11	1776875	1781750	C151	deletion	NHR	1774640	1781409	11.2582	0.36	1.86429	1	T
scaffold_11	1810000	1815375	C380	duplication
scaffold_11	1860395	1860396	C151	SNP
scaffold_11	1877748	1877749	C151	SNP
scaffold_11	1878705	1878706	C352	SNP
scaffold_11	2061161	2061162	C291	SNP
scaffold_110	18000	22625	C364	duplication
scaffold_110	315000	316750	C151	deletion
scaffold_110	365000	368500	C44	duplication
scaffold_110	365500	369125	C300	duplication
scaffold_111	39521	39522	C372	SNP
scaffold_111	217750	219500	C376	deletion	NHR	217373	218769	11.7	0.21	1.67449	0	-
scaffold_111	245350	245351	C08	SNP
scaffold_111	248625	251250	C40	deletion
scaffold_111	271179	271180	C39	SNP
scaffold_112	202239	202240	C167	SNP
scaffold_112	219668	219669	C167	SNP
scaffold_112	236125	238500	C280	deletion
scaffold_112	238625	239625	C280	deletion
scaffold_112	239875	244125	C280	deletion
scaffold_112	257750	262125	C178	deletion
scaffold_113	65860	65861	C280	SNP
scaffold_113	134668	134669	C40	SNP
scaffold_113	187635	187636	C178	SNP
scaffold_113	225875	228500	C182	deletion
scaffold_113	249503	249504	C178	SNP
scaffold_113	271237	271238	C281	SNP
scaffold_113	330998	330999	C378	SNP
scaffold_113	364125	366000	C352	deletion
scaffold_114	249785	249786	C37	SNP
scaffold_114	252782	252783	C13	SNP
scaffold_114	354250	357625	C376	deletion
scaffold_115	69020	69021	C251	SNP
scaffold_115	104396	104397	C372	SNP
scaffold_1151	5011	5012	C284	INDEL
scaffold_116	23375	30375	C376	duplication
scaffold_116	23625	30125	C40	deletion	NHR	23271	33954	10.8745	0.27	1.75918	1	C
scaffold_116	30250	34625	C40	deletion
scaffold_116	30375	34875	C376	duplication
scaffold_116	41250	41875	C376	deletion	NHR	41327	42187	10.4	0.4	1.83571	1	G
scaffold_116	50500	54000	C37	duplication
scaffold_116	83500	92500	C40	deletion
scaffold_116	83625	92375	C376	duplication
scaffold_116	90250	101500	C155	deletion
scaffold_116	92375	98875	C376	duplication
scaffold_116	92750	99000	C40	deletion
scaffold_116	99375	101375	C40	deletion
scaffold_116	101375	103125	C40	deletion
scaffold_116	132375	135500	C376	duplication	NAHR									1
scaffold_116	132500	135250	C40	deletion	NAHR	132558	135309	11.2122	0.46	1.93469	0	N.A
scaffold_116	263125	264250	C40	deletion	NHR	263205	264138	10.7592	0.31	1.78163	1	T
scaffold_116	285625	288000	C376	deletion
scaffold_116	291000	293125	C40	deletion
scaffold_116	309875	311625	C02	deletion
scaffold_116	336125	342250	C40	duplication
scaffold_116	358875	361125	C40	deletion	NHR	359202	360993	10.6041	0.42	1.92959	0	N.A
scaffold_1164	375	1750	C182	deletion
scaffold_118	34119	34120	C187	SNP
scaffold_118	52885	52886	C281	SNP
scaffold_118	163723	163724	C21	SNP
scaffold_118	230125	236875	C02	duplication
scaffold_118	346625	349125	C280	deletion	NHR	347479	348931	11.5898	0.38	1.79286	0	-
scaffold_119	6875	9500	C02	deletion	NHR	7314	9095	11.7643	0.32	1.77041	1	C
scaffold_119	16613	16614	C355	SNP
scaffold_119	160000	165875	C291	deletion
scaffold_119	163125	165875	C151	deletion
scaffold_12	6500	17750	C364	duplication
scaffold_12	30000	35625	C364	duplication
scaffold_12	46500	60000	C364	duplication										1
scaffold_12	60250	74500	C364	duplication										1
scaffold_12	101125	107000	C02	duplication
scaffold_12	162205	162206	C25	SNP
scaffold_12	383564	383565	C182	SNP
scaffold_12	438942	438943	C151	SNP
scaffold_12	451875	454625	C299	deletion
scaffold_12	483000	495375	C299	deletion
scaffold_12	504250	510875	C299	deletion
scaffold_12	567000	570875	C299	deletion
scaffold_12	572125	575875	C170	deletion
scaffold_12	588408	588409	C151	SNP
scaffold_12	593925	593926	C34	INDEL
scaffold_12	605118	605119	C44	SNP
scaffold_12	610351	610352	C40	SNP
scaffold_12	688875	693000	C380	duplication
scaffold_12	744682	744683	C378	SNP
scaffold_12	760768	760769	C07	SNP
scaffold_12	761918	761919	C02	SNP
scaffold_12	820490	820491	C170	SNP
scaffold_12	891479	891480	C02	INDEL
scaffold_12	906483	906484	C01	SNP
scaffold_12	1009330	1009331	C378	SNP
scaffold_12	1029125	1032000	C20	deletion	NHR	1029229	1031245	10.9184	0.5	1.9602	1	G
scaffold_12	1082874	1087875	C02	deletion
scaffold_12	1226617	1226618	C170	SNP
scaffold_12	1415900	1415901	C170	SNP
scaffold_12	1446000	1449750	C02	deletion
scaffold_12	1491375	1494375	C251	duplication
scaffold_12	1494500	1500375	C251	duplication
scaffold_12	1526375	1529500	C380	duplication										1
scaffold_12	1547797	1547798	C380	SNP
scaffold_12	1594375	1600375	C380	duplication	NAHR									1
scaffold_12	1649828	1649829	C170	INDEL
scaffold_12	1821750	1825000	C380	duplication
scaffold_12	1825625	1828375	C380	duplication
scaffold_12	1913125	1919750	C02	duplication
scaffold_12	2059239	2059240	C254	SNP
scaffold_12	2120099	2120100	C355	SNP
scaffold_120	64843	64844	C291	SNP
scaffold_120	76712	76713	C167	SNP
scaffold_120	155604	155605	C251	SNP
scaffold_120	249375	254125	C151	deletion
scaffold_120	313000	316125	C02	deletion
scaffold_121	139018	139019	C299	SNP
scaffold_122	204000	208000	C380	duplication
scaffold_122	294282	294283	C256	SNP
scaffold_123	7250	9750	C352	duplication
scaffold_123	80625	83875	C352	duplication
scaffold_123	129875	135375	C352	duplication
scaffold_123	169000	171000	C352	deletion	NHR	169282	169838	10.8663	0.46	1.91327	0	-
scaffold_123	196750	198250	C352	duplication
scaffold_123	204750	207750	C352	deletion
scaffold_123	290742	290743	C181	SNP
scaffold_123	367875	371250	C352	duplication
scaffold_123	368750	372000	C178	deletion
scaffold_123	371250	375625	C352	duplication
scaffold_123	372625	377375	C178	deletion
scaffold_1236	6049	6050	C17	INDEL
scaffold_124	73792	73793	C17	SNP
scaffold_124	157875	159625	C251	deletion
scaffold_124	157875	159625	C280	deletion
scaffold_124	173875	182500	C280	deletion
scaffold_124	371883	371884	C21	SNP
scaffold_125	309250	316625	C380	deletion	NHR	309894	315647	10.8531	0.51	1.98265	0	-
scaffold_126	88839	88840	C171	SNP
scaffold_126	134250	144625	C39	duplication
scaffold_126	184708	184709	C254	SNP
scaffold_127	2375	3750	C280	deletion
scaffold_127	50000	52125	C280	deletion
scaffold_127	82250	89125	C280	deletion
scaffold_127	103375	111750	C291	deletion	NHR	101655	111510	11.3143	0.27	1.69388	1	T
scaffold_127	112000	116625	C291	deletion
scaffold_127	116625	121375	C291	deletion	NHR	111786	119115	10.4071	0.37	1.85408	5	ATGAA
scaffold_127	144000	149250	C291	deletion	NHR	141797	147852	11.1408	0.45	2.01224	0	-
scaffold_127	358250	363875	C364	duplication	NAHR
scaffold_127	366250	369500	C39	duplication
scaffold_128	43125	44250	C251	deletion	NHR	40766	46855	10.2898	0.43	2.03469	1	C
scaffold_128	63510	63511	C18	SNP
scaffold_128	95165	95166	C391	SNP
scaffold_128	319625	321875	C291	deletion	NHR	319335	323647	11.0898	0.35	1.86633	0	-
scaffold_129	45809	45810	C24	SNP
scaffold_129	185250	189625	C380	duplication
scaffold_129	186250	191125	C378	duplication
scaffold_13	34045	34046	C284	SNP
scaffold_13	228281	228282	C352	SNP
scaffold_13	345125	346375	C187	deletion	NHR	344928	346682	10.8786	0.48	2.00918	3	CGA
scaffold_13	497875	499375	C378	deletion
scaffold_13	639749	639750	C391	SNP
scaffold_13	712750	714500	C281	deletion
scaffold_13	776625	780375	CC9	deletion
scaffold_13	800030	800031	CC4	SNP
scaffold_13	945602	945603	C181	SNP
scaffold_13	945611	945612	C181	SNP
scaffold_13	1103375	1109750	C44	deletion	NAHR	1103615	1110054	10.5071	0.46	2.0051	1	T
scaffold_13	1168575	1168576	C167	SNP
scaffold_13	1288985	1288986	C299	SNP
scaffold_13	1362528	1362529	C37	SNP
scaffold_13	1369951	1369952	C40	SNP
scaffold_13	1448608	1448609	C167	SNP
scaffold_13	1548178	1548179	C291	SNP
scaffold_13	1716997	1716998	C39	SNP
scaffold_13	1818006	1818007	C256	SNP
scaffold_130	67560	67561	C281	INDEL
scaffold_130	75875	81750	C40	deletion	NHR	79073	81731	10.5694	0.45	1.93367	2	TT
scaffold_130	96625	106875	C40	deletion
scaffold_130	96625	107000	C376	duplication
scaffold_130	254611	254612	C376	SNP
scaffold_131	105250	108750	CC3	duplication
scaffold_131	146955	146956	C372	SNP
scaffold_132	14625	18125	C364	duplication
scaffold_132	161750	166125	C364	deletion
scaffold_1322	750	2250	C376	duplication
scaffold_1322	2125	5125	C376	deletion
scaffold_133	34250	37875	C291	deletion	NHR	33860	37367	11.352	0.3	1.7398	0	-
scaffold_133	39625	44500	C291	duplication
scaffold_133	56375	59500	C291	duplication
scaffold_133	99125	101750	C291	deletion
scaffold_133	164106	164107	C374	SNP
scaffold_133	199406	199407	C380	SNP
scaffold_133	208000	216000	C291	duplication
scaffold_133	212000	213875	C281	deletion	NAHR	211244	214961	10.8918	0.32	1.82653	0	-
scaffold_133	248000	250875	C291	deletion
scaffold_133	272625	273500	C291	deletion	NHR	272770	273492	10.5633	0.36	1.79796	0	-
scaffold_133	279625	282625	C291	duplication
scaffold_133	292125	293750	C291	deletion	NHR	291598	293421	11.1143	0.29	1.85816	0	-
scaffold_134	8875	19625	C364	deletion
scaffold_134	71741	71742	C256	SNP
scaffold_134	188750	193375	C251	deletion	NHR	188835	193848	10.9959	0.42	1.83673	0	-
scaffold_134	188875	192375	C280	deletion
scaffold_134	270405	270406	C02	SNP
scaffold_134	274500	279875	C364	duplication
scaffold_134	311375	314875	C178	deletion
scaffold_1340	9290	9291	C291	SNP
scaffold_135	33625	37875	C380	duplication
scaffold_135	66375	72250	C44	duplication
scaffold_1355	387	388	C364	INDEL
scaffold_136	9125	13375	C380	duplication
scaffold_136	17842	17843	C17	INDEL
scaffold_136	58625	65500	CC10	deletion
scaffold_136	193875	200250	C280	deletion
scaffold_136	194000	200500	C251	deletion	NHR	193905	200517	10.4612	0.38	1.85102	2	GT
scaffold_138	82074	82075	C372	SNP
scaffold_138	105875	107375	C281	deletion	NHR	105991	107961	11.2949	0.25	1.68673	0	-
scaffold_138	118689	118690	C280	SNP
scaffold_138	293875	296375	C355	deletion	NHR	294795	299205	10.5235	0.49	2.07041	4	CCAT
scaffold_139	158968	158969	C300	SNP
scaffold_139	195237	195238	C178	SNP
scaffold_139	249125	251625	C21	deletion
scaffold_14	173500	175375	C380	duplication
scaffold_14	297625	304250	C16	duplication
scaffold_14	300421	300422	CC6	SNP
scaffold_14	365924	365925	C37	SNP
scaffold_14	370817	370818	C378	SNP
scaffold_14	431375	434500	C170	deletion	NAHR	431473	433359	11.2704	0.34	1.84592	17	TAATATAGGCCTAGTCG
scaffold_14	440331	440332	C251	SNP
scaffold_14	518984	518985	C372	INDEL
scaffold_14	598972	598973	C378	SNP
scaffold_14	768793	768794	C281	SNP
scaffold_14	808250	811125	C44	deletion	NHR	806975	811060	10.8939	0.27	1.73367	1	T
scaffold_14	952127	952128	C251	INDEL
scaffold_14	995875	1002125	C44	duplication
scaffold_14	1507208	1507209	C03	SNP
scaffold_140	66212	66213	C364	SNP
scaffold_140	146625	151000	C380	duplication
scaffold_140	168625	175000	C151	deletion
scaffold_140	176500	179625	CC11	deletion
scaffold_141	39515	39516	C378	SNP
scaffold_141	50625	59500	C155	duplication
scaffold_141	55825	55826	C01	SNP
scaffold_141	115962	115963	C376	SNP
scaffold_141	163500	164625	C40	deletion
scaffold_141	164375	166000	C376	deletion
scaffold_141	286750	288375	C40	deletion
scaffold_142	625	8125	C291	deletion
scaffold_142	29400	29401	C178	SNP
scaffold_142	73499	77375	C39	deletion
scaffold_142	185875	191875	C291	deletion
scaffold_142	232500	234000	C378	deletion	NHR	232596	237715	10.3092	0.45	1.88878	2	TC
scaffold_142	238988	238989	C380	SNP
scaffold_143	178250	184125	C151	deletion
scaffold_144	67774	67775	C281	SNP
scaffold_144	104125	109125	C280	deletion	NHR	104089	106695	10.4276	0.55	2.10408	0	-
scaffold_144	128875	136500	C151	deletion
scaffold_144	181414	181415	C14	SNP
scaffold_144	297641	297642	C352	SNP
scaffold_144	297659	297660	C352	SNP
scaffold_145	40500	40501	C281	SNP
scaffold_146	93605	93606	C300	SNP
scaffold_146	277250	280125	C178	deletion
scaffold_147	750	7875	C151	deletion
scaffold_147	69750	73750	C372	deletion
scaffold_148	188875	191000	C171	deletion
scaffold_148	188875	190500	C181	deletion
scaffold_148	208250	212625	C171	deletion	NHR	205017	211773	11.349	0.22	1.73163	0	-
scaffold_148	224875	229000	C372	deletion	NHR	225151	227532	10.2582	0.22	1.75408	1	T
scaffold_149	63606	63607	C37	SNP
scaffold_149	69375	70375	C178	deletion
scaffold_149	122280	122281	C355	SNP
scaffold_149	237605	237606	C170	SNP
scaffold_1496	8968	8969	C13	SNP
scaffold_1499	2842	2843	C08	SNP
scaffold_15	100040	100041	C12	SNP
scaffold_15	285257	285258	C40	SNP
scaffold_15	434280	434281	C170	SNP
scaffold_15	513423	513424	C34	SNP
scaffold_15	543889	543890	C256	SNP
scaffold_15	569676	569677	C155	SNP
scaffold_15	569677	569678	C155	SNP
scaffold_15	628926	628927	C178	SNP
scaffold_15	667625	670000	C372	deletion	NHR	667431	670607	10.2439	0.4	1.87347	0	-
scaffold_15	840968	840969	C170	SNP
scaffold_15	844374	846500	C02	deletion	NHR	844673	848306	10.7816	0.26	1.82449	2	TT
scaffold_15	1011000	1013000	C355	deletion
scaffold_15	1039963	1039964	C391	SNP
scaffold_15	1222525	1222526	C08	SNP
scaffold_15	1261395	1261396	C37	SNP
scaffold_15	1268724	1268725	C20	SNP
scaffold_15	1458143	1458144	C170	SNP
scaffold_151	149375	157625	C374	duplication
scaffold_151	150500	157750	C25	duplication
scaffold_151	224605	224606	C24	SNP
scaffold_151	259500	266625	C251	duplication
scaffold_151	260750	265500	C280	deletion
scaffold_152	5375	6500	C280	deletion	NHR	3328	8447	11.5153	0.2	1.68163	0	-
scaffold_152	33000	35500	C380	duplication
scaffold_152	56530	56531	C364	SNP
scaffold_152	96375	99250	C372	deletion	NHR	96536	100157	11.7653	0.23	1.75714	3	TTA
scaffold_153	154957	154958	C151	SNP
scaffold_153	156625	163500	C364	duplication
scaffold_154	58500	63625	C178	deletion
scaffold_154	139625	146250	C280	deletion	NHR	141286	146062	10.6663	0.43	1.87245	2	AA
scaffold_154	139625	141125	C380	duplication
scaffold_154	180181	180182	C17	SNP
scaffold_154	180557	180558	C178	SNP
scaffold_155	245618	245619	C380	SNP
scaffold_155	264961	264962	C178	SNP
scaffold_155	278375	280375	C151	duplication
scaffold_155	293135	293136	C36	SNP
scaffold_155	293743	293744	C167	SNP
scaffold_156	21125	23875	C380	duplication
scaffold_156	30500	36125	C380	duplication
scaffold_156	30625	32000	C355	deletion	NHR	28045	32133	10.9429	0.38	1.96122	1	A
scaffold_156	162750	167625	C380	duplication
scaffold_157	31375	36125	C380	duplication
scaffold_157	41750	60125	C380	duplication
scaffold_157	103875	111625	C380	deletion	NHR	103567	118868	10.4184	0.43	1.91327	1	T
scaffold_157	104375	107375	C281	deletion
scaffold_157	116000	122500	C291	duplication
scaffold_157	123000	125875	C380	deletion
scaffold_157	162000	165000	C380	deletion	NAHR	160996	164249	10.25	0.55	2.11837	1	A
scaffold_157	165125	168500	C380	deletion
scaffold_157	210500	218500	C380	deletion	NHR	212881	217067	11.4276	0.32	1.83265	0	-
scaffold_1579	8002	8003	C291	SNP
scaffold_158	9500	11000	C372	deletion
scaffold_158	27473	27474	C06	SNP
scaffold_158	188813	188814	C170	SNP
scaffold_159	102125	103625	C364	deletion	NHR	102144	103539	10.4653	0.45	1.88673	0	-
scaffold_16	0	1375	C171	deletion
scaffold_16	0	1375	C181	deletion
scaffold_16	30375	34375	C171	deletion	NHR	29333	34538	11.0208	0.5	1.97477	0	-
scaffold_16	30375	36625	C181	deletion	NHR	30101	34433	10.9429	0.33	1.81531	2	AC
scaffold_16	103660	103661	C284	SNP
scaffold_16	355005	355006	C178	SNP
scaffold_16	366500	368125	C171	deletion	NHR	366416	369810	10.6296	0.42	1.76224	1	C
scaffold_16	366500	368125	C181	deletion	NHR	366416	369810	10.6296	0.42	1.76224	1	C
scaffold_16	615000	617750	C151	deletion
scaffold_16	835337	835338	C170	SNP
scaffold_16	949363	949364	C34	INDEL
scaffold_16	1141250	1142250	C372	deletion
scaffold_16	1185750	1191250	C364	duplication
scaffold_16	1189448	1189449	C38	SNP
scaffold_16	1296851	1296852	C300	SNP
scaffold_16	1305646	1305647	C08	SNP
scaffold_16	1425354	1425355	CC8	SNP
scaffold_160	46375	48625	C372	deletion	NHR	46234	48244	10.549	0.31	1.84184	3	TTT
scaffold_160	49000	69125	C251	deletion	NHR	50057	70014	10.8867	0.23	1.73571	1	T
scaffold_160	63500	67125	C372	deletion
scaffold_160	70500	85625	C372	deletion
scaffold_160	96750	100250	C380	duplication
scaffold_160	124500	129500	C372	deletion
scaffold_160	125680	125681	C151	SNP
scaffold_160	126160	126161	CC12	SNP
scaffold_160	130654	130655	C13	SNP
scaffold_160	169875	174250	C171	duplication
scaffold_160	200250	210875	C372	deletion	NHR	200637	208355	10.4541	0.31	1.76429	0	-
scaffold_161	31500	35375	C178	deletion
scaffold_161	75782	75783	C178	SNP
scaffold_161	75792	75793	C178	SNP
scaffold_161	75793	75794	C178	SNP
scaffold_161	163969	163970	C44	SNP
scaffold_162	55000	57500	C40	deletion	NHR	54549	57888	10.4908	0.5	2.06122	0	-
scaffold_162	218897	218898	C372	SNP
scaffold_163	106478	106479	C181	SNP
scaffold_166	45000	46375	C02	deletion
scaffold_166	89000	92375	C376	deletion	NHR	89107	93541	11.5031	0.1	1.61327	4	AGTT
scaffold_166	101625	104750	C376	duplication
scaffold_166	102000	104750	C40	deletion	NHR	99989	105025	11.4796	0.32	1.71122	2	TT
scaffold_166	109625	112625	C376	duplication
scaffold_166	110500	112375	C40	deletion	NHR	109464	113261	10.5582	0.22	1.73673	1	T
scaffold_166	140625	142000	C376	deletion	NHR	141008	141750	11.5939	0.36	1.93265	0	-
scaffold_166	172739	172740	C36	SNP
scaffold_166	250125	256750	CC10	duplication
scaffold_167	123250	130625	C291	deletion
scaffold_167	213042	213043	C300	SNP
scaffold_168	145625	149125	C178	deletion	NHR	144795	148903	10.8102	0.41	1.88061	0	-
scaffold_168	231375	234000	C378	duplication
scaffold_169	6296	6297	C187	SNP
scaffold_169	92250	95250	C364	duplication
scaffold_169	104875	108250	C376	duplication
scaffold_169	105750	109500	C40	deletion
scaffold_17	121125	129000	C376	duplication
scaffold_17	122625	129000	C40	deletion	NHR	125535	130410	10.3796	0.43	1.92653	1	C
scaffold_17	126203	126204	C170	SNP
scaffold_17	233844	233845	C167	SNP
scaffold_17	260625	262625	C380	duplication
scaffold_17	696500	701625	C178	deletion
scaffold_17	812976	812977	C44	INDEL
scaffold_17	1103483	1103484	C281	SNP
scaffold_17	1119949	1119950	C16	SNP
scaffold_17	1364375	1366500	C376	deletion	NHR	1364170	1366910	9.7898	0.48	1.97755	2	AA
scaffold_17	1368226	1368227	C178	SNP
scaffold_17	1384625	1393750	C391	deletion	NHR	1384699	1395531	11.3714	0.41	1.85204	0	-
scaffold_170	31447	31448	C39	SNP
scaffold_170	33750	40875	C291	duplication
scaffold_170	169500	175250	C178	duplication
scaffold_171	174125	178250	C151	deletion
scaffold_173	38250	43250	C178	deletion
scaffold_173	128625	133875	C251	deletion	NHR	128205	136703	10.3735	0.4	1.88265	2	CA
scaffold_173	134058	134059	C25	SNP
scaffold_173	167625	171500	C380	duplication
scaffold_173	168875	176000	C02	deletion	NHR	172463	176906	12.1051	0.26	1.72551	2	TA
scaffold_173	177875	190000	C02	deletion	NAHR	177159	188983	10.351	0.43	1.91735	1	G
scaffold_174	26125	31250	C02	duplication
scaffold_174	120250	122750	C02	deletion
scaffold_175	69375	71250	C380	duplication
scaffold_175	148625	153000	C380	duplication
scaffold_175	164875	167375	C380	duplication
scaffold_176	62865	62866	C17	INDEL
scaffold_176	108500	114875	C02	duplication
scaffold_177	50250	55500	C40	deletion
scaffold_177	58125	74375	C376	duplication
scaffold_177	61875	74625	C40	deletion	NHR	61198	74400	11.1765	0.37	1.8551	1	A
scaffold_177	136750	147000	C291	duplication	NAHR
scaffold_177	162250	165000	C376	deletion
scaffold_177	174625	180625	C151	deletion
scaffold_177	175500	180875	C40	duplication
scaffold_177	176625	180625	C376	deletion	NHR	176969	180720	10.5735	0.34	1.84082	2	AA
scaffold_177	229750	231000	C376	deletion	NHR	228580	230371	10.6429	0.4	1.86327	0	-
scaffold_177	243125	244250	C40	deletion
scaffold_177	281750	285125	C376	deletion	UNSURE	281682	284630	9.72245	0.43	2.02347	1	T
scaffold_18	89500	95000	C02	deletion
scaffold_18	176476	176477	C280	SNP
scaffold_18	429259	429260	C13	SNP
scaffold_18	442439	442440	C151	SNP
scaffold_18	442440	442441	C151	SNP
scaffold_18	506720	506721	C300	SNP
scaffold_18	556560	556561	C178	SNP
scaffold_18	614625	617500	C40	deletion
scaffold_18	802375	804250	C281	deletion
scaffold_18	835125	842500	C18	deletion	NHR	835952	842239	10.9367	0.48	1.9602	0	-
scaffold_18	1031750	1041375	C280	deletion	NHR	1030939	1040079	10.5602	0.43	1.90612	0	-
scaffold_18	1044375	1048375	C40	deletion	NHR	1045066	1048130	10.352	0.38	1.89082	1	A
scaffold_18	1055750	1059750	C376	duplication
scaffold_18	1056750	1059625	C40	deletion	NHR	1056677	1060185	11.2857	0.26	1.75102	0	-
scaffold_18	1068500	1070125	C280	deletion
scaffold_18	1084250	1098500	C280	deletion	NHR	1083029	1096334	10.7347	0.3	1.85816	1	C
scaffold_18	1099125	1102500	C280	deletion	NHR	1098570	1111495	10.3765	0.42	1.91837	1	C
scaffold_18	1102625	1111875	C280	deletion
scaffold_18	1145625	1149750	C280	deletion	NHR	1145563	1148985	10.751	0.47	1.92143	0	-
scaffold_18	1163000	1169125	C280	deletion	NHR	1164287	1168033	10.1224	0.48	2.03469	0	-
scaffold_18	1174625	1178625	C280	deletion
scaffold_18	1183000	1188500	C280	deletion	NHR	1182510	1188172	10.8837	0.41	1.86531	0	-
scaffold_18	1189750	1193625	C280	deletion
scaffold_18	1193750	1197000	C280	deletion
scaffold_18	1197000	1201875	C280	deletion
scaffold_18	1202875	1205500	C280	deletion	NHR	1202953	1206170	11.1112	0.31	1.79796	0	-
scaffold_18	1226500	1230750	C280	deletion	NHR	1227170	1229564	10.1184	0.42	1.99592	0	-
scaffold_18	1258625	1263750	C280	deletion	NHR	1258510	1266026	9.96633	0.32	1.8449	0	-
scaffold_18	1270875	1278125	C280	deletion
scaffold_18	1279625	1288750	C280	deletion	NHR	1280142	1288785	10.5133	0.4	1.84694	0	N.A
scaffold_18	1290125	1299125	C280	deletion	NHR	1291469	1298681	11.1408	0.32	1.80612	0	N.A
scaffold_18	1306625	1315500	C280	deletion	NHR	1310091	1314752	10.8837	0.49	2	2	TC
scaffold_18	1391000	1396250	C280	deletion	NHR	1386991	1395662	11.2408	0.42	1.90816	1	A
scaffold_18	1420250	1424375	C280	deletion	NHR	1420295	1426664	11.3296	0.39	1.84796	0	-
scaffold_180	176125	178250	C182	deletion	NHR	173769	177915	10.7122	0.39	1.91633	1	A
scaffold_180	178250	187625	C380	deletion	NHR	179570	190120	11.2878	0.37	1.79796	1	A
scaffold_180	178250	187625	C21	duplication
scaffold_182	109750	111750	C251	deletion
scaffold_182	152000	153875	C02	deletion	NHR	149523	154484	10.8153	0.37	1.83265	1	T
scaffold_183	51698	51699	C291	SNP
scaffold_183	168626	168627	C251	SNP
scaffold_183	196125	198500	C372	deletion
scaffold_184	141751	141752	C07	SNP
scaffold_185	61875	65125	C182	deletion
scaffold_185	155375	157125	C40	deletion	NHR	154571	157125	10.552	0.4	1.97143	0	-
scaffold_186	6750	10125	C391	duplication
scaffold_186	100206	100207	C182	SNP
scaffold_186	117248	117249	C281	SNP
scaffold_186	117264	117265	C281	SNP
scaffold_186	146613	146614	C08	SNP
scaffold_186	187737	187738	C391	SNP
scaffold_187	16750	28500	C151	deletion
scaffold_187	19500	33125	C352	duplication	NAHR
scaffold_187	34125	39125	C352	duplication
scaffold_187	100495	100496	C155	SNP
scaffold_187	101875	108625	C352	deletion	NHR	101826	108577	11.9286	0.27	1.74898	0	-
scaffold_187	154125	155500	C352	duplication
scaffold_187	190043	190044	C13	SNP
scaffold_19	156280	156281	C374	SNP
scaffold_19	290511	290512	C256	SNP
scaffold_19	451625	458500	C300	duplication
scaffold_19	461476	461477	C300	SNP
scaffold_19	785546	785547	C155	SNP
scaffold_19	791050	791051	C378	SNP
scaffold_19	821223	821224	C170	SNP
scaffold_19	840272	840273	C155	SNP
scaffold_19	877500	887750	C02	deletion	NHR	879255	890491	11.3643	0.3	1.7449	1	A
scaffold_19	877500	887750	C34	deletion	NHR	876552	886561	12.7224	0.28	1.73469	2	TG
scaffold_19	887124	896125	C02	deletion	NHR	884907	896957	12.1153	0.3	1.72041	0	-
scaffold_19	933586	933587	C178	SNP
scaffold_19	1041496	1041497	C39	SNP
scaffold_19	1077694	1077695	C256	SNP
scaffold_19	1361039	1361040	C35	SNP
scaffold_19	1379000	1380750	C02	deletion	NHR	1375256	1380058	10.3643	0.44	2.03367	0	-
scaffold_19	1381391	1381392	C40	INDEL
scaffold_190	102561	102562	C280	SNP
scaffold_192	32125	34375	C380	duplication
scaffold_192	167250	174750	C24	duplication
scaffold_193	115250	125625	C40	duplication
scaffold_193	116500	126125	C155	duplication
scaffold_193	118250	125750	C376	deletion	NHR	116451	124074	11.3102	0.42	1.88163	0	-
scaffold_193	132625	134625	C376	deletion	NHR	132377	135817	11.5582	0.28	1.7449	0	-
scaffold_193	166875	170250	C40	deletion	NHR	167020	168805	11.0418	0.31	1.81429	0	-
scaffold_194	49000	53500	C291	duplication
scaffold_198	0	3250	C178	deletion
scaffold_198	51258	51259	C182	SNP
scaffold_198	136128	136129	C291	SNP
scaffold_198	148678	148679	C44	SNP
scaffold_2	15950	15951	C364	SNP
scaffold_2	19333	19334	C35	SNP
scaffold_2	41435	41436	C372	SNP
scaffold_2	100599	100600	C251	SNP
scaffold_2	457800	457801	C182	SNP
scaffold_2	534237	534238	C178	SNP
scaffold_2	558497	558498	C291	SNP
scaffold_2	585444	585445	C167	SNP
scaffold_2	605587	605588	C14	SNP
scaffold_2	617749	619875	C02	deletion	NHR	618526	619719	10.7102	0.42	1.94796	0	-
scaffold_2	711601	711602	C03	SNP
scaffold_2	796000	797625	C352	deletion	NHR	795101	798256	10.8173	0.48	1.93469	2	TG
scaffold_2	864813	864814	C178	SNP
scaffold_2	864822	864823	C178	SNP
scaffold_2	864831	864832	C178	SNP
scaffold_2	864833	864834	C178	SNP
scaffold_2	864834	864835	C178	SNP
scaffold_2	950324	950325	CC4,CC6,CC7,CC10,CC11,CC12	SNP
scaffold_2	1181506	1181507	C251	INDEL
scaffold_2	1376001	1376002	C35	SNP
scaffold_2	1511202	1511203	C08	SNP
scaffold_2	1848661	1848662	C284	SNP
scaffold_2	1918357	1918358	C374	SNP
scaffold_2	1970222	1970223	C372	SNP
scaffold_2	2201612	2201613	C01	SNP
scaffold_2	2247335	2247336	C291	SNP
scaffold_2	2247342	2247343	C291	SNP
scaffold_2	2247372	2247373	C291	SNP
scaffold_2	2317000	2321000	C372	deletion
scaffold_2	2588250	2594375	C178	deletion	NHR	2586755	2596814	10.4306	0.32	1.88878	0	-
scaffold_2	2626250	2632375	C178	deletion	NHR	2625310	2632295	10.7163	0.53	2.10816	2	GA
scaffold_2	2813068	2813069	C35	SNP
scaffold_2	2843019	2843020	C182	SNP
scaffold_2	2985830	2985831	C187	SNP
scaffold_2	3008317	3008318	C38	SNP
scaffold_2	3094474	3094475	C380	SNP
scaffold_2	3205079	3205080	C170	SNP
scaffold_2	3532500	3537625	C380	duplication	NAHR
scaffold_2	3537733	3537734	C12	SNP
scaffold_2	3545500	3546750	C02	deletion
scaffold_2	3619159	3619160	C280	SNP
scaffold_20	107788	107789	C181	SNP
scaffold_20	109621	109622	C187	SNP
scaffold_20	115782	115783	C24	SNP
scaffold_20	118000	125250	C280	deletion
scaffold_20	213750	218000	C187	deletion	NHR	210268	217060	11.5735	0.33	1.72143	0	-
scaffold_20	218750	220750	C187	deletion
scaffold_20	220750	253875	C187	deletion
scaffold_20	250627	250628	C21	SNP
scaffold_20	254125	260125	C187	deletion
scaffold_20	313125	320625	C187	deletion
scaffold_20	320625	327875	C187	deletion
scaffold_20	327875	332875	C187	deletion
scaffold_20	332875	338250	C187	deletion
scaffold_20	338375	352000	C187	deletion
scaffold_20	352000	366000	C187	deletion	NHR	353715	367565	10.5051	0.57	2.01122	1	C
scaffold_20	366000	368000	C187	deletion
scaffold_20	371875	376000	C187	deletion
scaffold_20	378125	380375	C187	deletion	NHR	375034	384575	10.6459	0.43	1.85306	0	-
scaffold_20	380375	389625	C187	deletion
scaffold_20	389625	397000	C187	deletion
scaffold_20	397000	412000	C187	deletion
scaffold_20	412000	414000	C187	deletion	NHR	410996	414042	10.3561	0.38	1.73776	1	A
scaffold_20	421750	430500	C187	deletion	NHR	422780	438424	11.9367	0.34	1.82755	2	CT
scaffold_20	430750	435750	C187	deletion
scaffold_20	435750	437125	C187	deletion
scaffold_20	438250	442875	C187	deletion
scaffold_20	445125	450500	C187	deletion	NHR	443484	448402	10.5653	0.37	1.86837	1	G
scaffold_20	452375	458500	C187	deletion	NHR	451771	457517	11.4224	0.42	1.84388	0	-
scaffold_20	458875	463125	C187	deletion
scaffold_20	463875	468250	C187	deletion
scaffold_20	468250	474250	C187	deletion
scaffold_20	474250	481125	C187	deletion
scaffold_20	481125	488875	C187	deletion
scaffold_20	506875	515875	C187	deletion
scaffold_20	515875	526125	C187	deletion	NHR	506328	526927	11.2714	0.34	1.79694	0	-
scaffold_20	526125	536125	C187	deletion
scaffold_20	527152	527153	C01	SNP
scaffold_20	536250	543375	C187	deletion
scaffold_20	543750	557000	C187	deletion
scaffold_20	562625	567500	C187	deletion
scaffold_20	567500	585250	C187	deletion
scaffold_20	585625	587375	C187	deletion	NHR	585485	596541	11.0888	0.26	1.70714	1	A
scaffold_20	587500	594875	C187	deletion
scaffold_20	598875	621000	C364	duplication
scaffold_20	621750	648625	C364	duplication
scaffold_20	887810	887811	C187	SNP
scaffold_20	916467	916468	C02	SNP
scaffold_20	965750	967000	C182	deletion
scaffold_20	1039125	1045250	C300	deletion	NHR	1039209	1045233	11.3367	0.35	1.78061	2	AT
scaffold_20	1069504	1069505	C291	SNP
scaffold_20	1077828	1077829	C07	SNP
scaffold_20	1103250	1107875	C251	deletion
scaffold_20	1246363	1246364	C372	SNP
scaffold_20	1312750	1312751	C02	SNP
scaffold_20	1346339	1346340	C44	SNP
scaffold_20	1379509	1379510	C40	SNP
scaffold_2003	1625	2750	C178	deletion
scaffold_201	141000	145500	C170	deletion
scaffold_202	0	6625	C364	deletion
scaffold_202	124631	124632	C254	SNP
scaffold_202	134500	154250	C34	duplication
scaffold_203	7875	30750	C151	deletion
scaffold_203	7875	27625	C170	deletion
scaffold_203	12875	30625	C281	deletion
scaffold_203	22375	30750	C376	deletion
scaffold_203	120750	137250	C178	deletion
scaffold_203	123625	137250	CC6	deletion
scaffold_203	127125	137250	CC11	deletion
scaffold_203	153750	166125	CC3	deletion
scaffold_206	11000	16000	C372	deletion	NHR	11759	15000	10.3306	0.35	1.93673	6	AAATGG
scaffold_206	34160	34161	C391	SNP
scaffold_206	52211	52212	C17	SNP
scaffold_207	102975	102976	C256	SNP
scaffold_209	57500	58500	C40	deletion	NHR	57150	58636	10.6745	0.44	1.98776	2	TC
scaffold_21	257250	260125	C372	deletion	NHR	258646	260079	11.2102	0.34	1.81327	0	-
scaffold_21	501484	501485	C170	SNP
scaffold_21	607851	607852	C281	SNP
scaffold_21	619250	625250	C181	deletion	NHR	619534	625161	10.1684	0.53	2.07959	1	A
scaffold_21	620125	624000	C171	deletion	NHR	619920	624121	10.7469	0.47	1.99898	1	G
scaffold_21	652849	652850	CC9	SNP
scaffold_21	1059608	1059609	C37	SNP
scaffold_21	1264536	1264537	C355	SNP
scaffold_21	1393901	1393902	C280	SNP
scaffold_210	64750	68500	C40	deletion	NHR	64791	68489	10.4724	0.45	2.12347	1	C
scaffold_211	138452	138453	C155	SNP
scaffold_213	4500	14750	C380	deletion	NHR	4267	13408	11.7357	0.3	1.72041	0	-
scaffold_213	67415	67416	C39	INDEL
scaffold_213	75632	75633	C284	SNP
scaffold_213	95500	103375	C380	deletion	NHR	97470	101396	10.0745	0.57	2.11327	0	-
scaffold_215	33911	33912	C167	SNP
scaffold_215	41625	47375	C380	deletion	NHR	40514	44318	11.548	0.41	1.8602	0	-
scaffold_215	124917	124918	C44	SNP
scaffold_215	129518	129519	C374	SNP
scaffold_218	56750	61250	C380	duplication	NAHR
scaffold_219	0	4750	C171	duplication
scaffold_219	55250	59000	C181	duplication
scaffold_219	59000	65750	C171	duplication
scaffold_219	59000	63625	C181	duplication
scaffold_219	70000	78125	C171	duplication	NAHR
scaffold_219	70500	81625	C171	duplication
scaffold_219	70500	81625	C181	duplication
scaffold_219	81500	83000	C171	deletion	NHR	80940	82482	11.6163	0.26	1.69694	1	T
scaffold_219	81500	83000	C181	deletion	NHR	80940	82482	11.6163	0.26	1.69694	1	T
scaffold_219	84000	91250	C171	deletion	NHR	83602	88127	10.7622	0.4	1.97653	0	-
scaffold_219	84375	91250	C181	deletion
scaffold_219	99750	103875	C171	duplication
scaffold_219	104875	109875	C171	duplication
scaffold_219	104875	109875	C181	duplication
scaffold_219	115750	121125	C171	deletion	NHR	113915	123998	10.4663	0.46	2.11122	1	C
scaffold_219	115750	121250	C181	deletion
scaffold_219	123000	126000	C171	deletion	NHR	122738	126005	10.5255	0.37	1.90306	5	TTTCA
scaffold_219	123000	126000	C181	deletion
scaffold_22	27125	30625	C37	duplication
scaffold_22	28250	30625	C391	duplication
scaffold_22	74250	87750	C380	duplication	NAHR
scaffold_22	131125	138250	C44	duplication	NAHR
scaffold_22	267253	267254	C187	SNP
scaffold_22	706223	706224	C291	SNP
scaffold_22	727773	727774	C03	INDEL
scaffold_22	991312	991313	C378	SNP
scaffold_22	1147000	1150875	C372	duplication
scaffold_22	1221833	1221834	C355	INDEL
scaffold_220	63716	63717	C44	SNP
scaffold_220	183705	183706	C378	SNP
scaffold_221	478	479	C02	SNP
scaffold_221	26278	26279	C167	SNP
scaffold_221	74476	74477	C380	SNP
scaffold_222	45000	47125	CC11	deletion
scaffold_223	82375	86250	C380	duplication
scaffold_223	88372	88373	C36	SNP
scaffold_224	10375	15125	C376	deletion
scaffold_226	48795	48796	C151	SNP
scaffold_228	37107	37108	C299	SNP
scaffold_228	37681	37682	C151	SNP
scaffold_228	43838	43839	C25	SNP
scaffold_228	63872	63873	C24	SNP
scaffold_23	24000	25125	C352	deletion
scaffold_23	25125	35875	C352	deletion
scaffold_23	35875	43875	C352	deletion
scaffold_23	44000	59250	C352	deletion
scaffold_23	55715	55716	C376	SNP
scaffold_23	59375	61750	C352	deletion
scaffold_23	69375	90750	C352	deletion	NHR	69090	89829	11.2133	0.3	1.81224	0	-
scaffold_23	72724	72725	C07	SNP
scaffold_23	92250	122875	C352	deletion	NHR	91915	125780	11.0612	0.44	1.90612	1	G
scaffold_23	123250	124750	C352	duplication
scaffold_23	124875	128500	C352	duplication
scaffold_23	157500	161375	C352	deletion
scaffold_23	161500	250750	C352	deletion
scaffold_23	187366	187367	C251	SNP
scaffold_23	198416	198417	C12	SNP
scaffold_23	250875	257875	C352	deletion
scaffold_23	269625	323625	C352	duplication	NAHR
scaffold_23	288330	288331	C151	SNP
scaffold_23	327875	339000	C352	duplication
scaffold_23	576279	576280	C291	SNP
scaffold_23	581135	581136	CC4,CC6,CC7,CC10,CC11,CC12	SNP
scaffold_23	1025250	1028125	C178	deletion	NHR	1026710	1028062	11.3041	0.37	1.86837	0	-
scaffold_23	1027131	1027132	C167	SNP
scaffold_23	1232264	1232265	C352	SNP
scaffold_231	71000	75375	C372	deletion	NHR	71677	77271	10.9418	0.3	1.89082	1	T
scaffold_231	98125	105875	C364	duplication
scaffold_231	107875	111375	C40	deletion	NHR	103549	111528	11.1388	0.39	1.83061	0	-
scaffold_231	112125	118000	CC11	deletion
scaffold_232	113736	113737	C167	SNP
scaffold_232	168500	170875	C380	duplication
scaffold_235	14750	18875	CC12	duplication
scaffold_235	71750	77500	C151	deletion	NHR	71746	78295	11.3153	0.34	1.87245	0	-
scaffold_235	87582	87583	C187	SNP
scaffold_235	94477	94478	C35	SNP
scaffold_236	93345	93346	C12	SNP
scaffold_237	44249	47250	C02	deletion
scaffold_239	20500	23250	C171	deletion
scaffold_239	21250	22750	C181	deletion
scaffold_24	178250	181375	C40	deletion	NHR	178010	182147	11.2561	0.35	1.79796	0	-
scaffold_24	245000	254750	C155	deletion
scaffold_24	286750	288000	C376	deletion	NAHR	286756	288606	11.2673	0.39	1.94184	1	A
scaffold_24	287875	294750	C40	deletion	NHR	289001	294814	11.198	0.41	1.87755	0	-
scaffold_24	287875	294750	C376	duplication	NAHR
scaffold_24	298500	300875	C40	deletion	NHR	299601	301136	11.6378	0.28	1.72755	2	TT
scaffold_24	333000	337000	C376	deletion	NHR	333441	338754	12.2214	0.24	1.66939	1	T
scaffold_24	369125	371625	C181	deletion
scaffold_24	467015	467016	C16	SNP
scaffold_24	565500	568125	C376	deletion	NHR	564878	569511	10.5449	0.47	1.87857	0	-
scaffold_24	872432	872433	C376	SNP
scaffold_24	914375	916250	C40	deletion
scaffold_24	924375	927125	C376	deletion
scaffold_24	930250	936625	C155	deletion
scaffold_24	953250	955750	C376	duplication
scaffold_24	953375	955750	C40	deletion	NHR	954469	955886	10.8531	0.4	1.91633	3	AAA
scaffold_24	957250	958250	C376	deletion
scaffold_24	968375	970375	C376	deletion
scaffold_24	999000	1000750	C40	deletion
scaffold_24	999250	1000750	C376	duplication
scaffold_24	1042500	1045750	C40	deletion	NHR	1038833	1045545	11.9061	0.28	1.67653	2	AG
scaffold_24	1042500	1045750	C376	duplication
scaffold_24	1110391	1110392	C20	SNP
scaffold_24	1135134	1135135	C07	SNP
scaffold_24	1225875	1227125	C40	deletion	NHR	1225555	1230059	10.6622	0.29	1.76531	0	-
scaffold_24	1227625	1228750	C40	deletion
scaffold_24	1275000	1276875	C187	deletion
scaffold_24	1279750	1287375	CC11	deletion
scaffold_24	1282693	1282694	C17	SNP
scaffold_24	1283407	1283408	C355	SNP
scaffold_24	1304750	1306500	C376	deletion	NHR	1302834	1306545	10.7357	0.35	1.84082	0	-
scaffold_24	1304750	1306375	C40	duplication
scaffold_24	1307000	1310375	C376	deletion	NHR	1305491	1309814	10.5673	0.31	1.78878	0	-
scaffold_240	11625	17875	C151	deletion
scaffold_240	95125	102625	C155	duplication
scaffold_241	79125	81000	C187	deletion	NHR	78931	80879	10.5959	0.29	1.81327	0	-
scaffold_241	79228	79229	C17	SNP
scaffold_242	1875	12250	C155	duplication
scaffold_242	1875	12250	C40	duplication
scaffold_242	45125	47125	C40	deletion
scaffold_242	107877	107878	C352	SNP
scaffold_244	89439	89440	C06	SNP
scaffold_244	91256	91257	C06	SNP
scaffold_245	3375	5125	CC10	duplication
scaffold_245	36016	36017	C37	SNP
scaffold_247	24875	30625	C376	duplication
scaffold_247	35152	35153	C254	SNP
scaffold_25	192265	192266	C291	SNP
scaffold_25	243043	243044	C170	SNP
scaffold_25	477818	477819	C170	SNP
scaffold_25	477820	477821	C170	SNP
scaffold_25	486540	486541	C380	SNP
scaffold_25	486546	486547	C380	SNP
scaffold_25	608750	623000	C364	duplication
scaffold_25	632250	649500	C364	duplication
scaffold_25	662375	669000	C364	duplication
scaffold_25	815875	817500	C02	deletion
scaffold_25	966213	966214	C25	SNP
scaffold_25	1009125	1012750	C300	duplication
scaffold_25	1075845	1075846	C37	SNP
scaffold_25	1206440	1206441	C187	SNP
scaffold_250	88000	97000	C378	duplication
scaffold_250	91375	96750	C374	deletion	NHR	86644	97067	9.97755	0.55	2.0602	0	-
scaffold_250	97750	102750	C02	duplication
scaffold_252	23375	30875	C380	deletion
scaffold_252	39692	39693	C01	SNP
scaffold_252	71375	74500	C380	deletion	NHR	69858	74617	10.0082	0.53	2.13265	0	-
scaffold_253	38250	43000	C151	deletion
scaffold_258	38500	41875	C40	deletion
scaffold_26	89626	89627	C182	INDEL
scaffold_26	89627	89628	C182	INDEL
scaffold_26	105113	105114	C37	SNP
scaffold_26	146745	146746	C38	SNP
scaffold_26	250519	250520	C256	SNP
scaffold_26	286295	286296	C284	SNP
scaffold_26	353537	353538	CC9	SNP
scaffold_26	361625	369875	C291	duplication
scaffold_26	430698	430699	C20	INDEL
scaffold_26	462875	465500	C02	deletion
scaffold_26	529769	529770	C08	SNP
scaffold_26	665728	665729	C251	SNP
scaffold_26	698585	698586	C07	SNP
scaffold_26	864715	864716	C39	SNP
scaffold_26	931404	931405	C391	SNP
scaffold_26	947500	951375	C251	duplication
scaffold_26	1044500	1047000	C380	duplication
scaffold_260	18000	25625	C155	duplication
scaffold_260	18000	25625	C40	duplication
scaffold_260	19750	25000	C376	deletion	NHR	20386	24979	10.9857	0.48	1.97347	0	-
scaffold_261	112750	120875	C372	deletion	NHR	113597	119703	10.5092	0.36	1.92449	2	AA
scaffold_261	112875	120125	C44	duplication
scaffold_262	56500	59250	C02	deletion
scaffold_266	6636	6637	C374	SNP
scaffold_266	80000	83125	C40	deletion
scaffold_266	83250	85875	C40	deletion
scaffold_2689	524	525	C182	SNP
scaffold_27	31000	36250	C372	deletion
scaffold_27	81068	81069	C181	SNP
scaffold_27	116375	119625	C280	deletion	NAHR	116084	121601	11.449	0.36	1.67245	42	AATATCAGTTCTGATAGTGTAGTGGTTAGAGTATGAGGTGAG
scaffold_27	119750	122125	C280	deletion
scaffold_27	156600	156601	CC3	SNP
scaffold_27	213250	220125	C291	deletion
scaffold_27	220375	230000	C291	duplication
scaffold_27	451490	451491	C21	SNP
scaffold_27	474288	474289	C21	SNP
scaffold_27	537024	537025	C374	SNP
scaffold_27	580875	582500	C254	deletion
scaffold_27	778863	778864	C254	SNP
scaffold_27	821250	826500	C380	duplication	NAHR
scaffold_27	872750	882375	C291	duplication
scaffold_27	887625	890000	C372	deletion
scaffold_27	1001250	1006875	C291	deletion
scaffold_272	31125	41375	C380	duplication
scaffold_275	36801	36802	C03	SNP
scaffold_28	59135	59136	C167	SNP
scaffold_28	99262	99263	C36	SNP
scaffold_28	108967	108968	C291	SNP
scaffold_28	263875	269000	C151	duplication
scaffold_28	407374	408500	C02	deletion
scaffold_28	463135	463136	C44	SNP
scaffold_28	590133	590134	C25	SNP
scaffold_28	595217	595218	C34	SNP
scaffold_28	604150	604151	C37	SNP
scaffold_28	770000	772375	CC10	deletion	NHR	766779	771461	11.8592	0.22	1.72449	2	TA
scaffold_28	817979	817980	C300	SNP
scaffold_28	997500	1007125	C352	deletion
scaffold_28	1018625	1031625	C352	deletion
scaffold_28	1090500	1095500	C352	deletion
scaffold_282	20125	26750	C374	duplication
scaffold_282	21875	24375	C372	deletion
scaffold_282	26750	31375	C378	deletion	NHR	27264	31237	11.2949	0.21	1.62653	4	TTTG
scaffold_282	26750	31375	C374	duplication
scaffold_282	31625	40500	C374	duplication
scaffold_282	57375	62625	C374	duplication
scaffold_282	66875	70000	C374	duplication
scaffold_283	34500	39875	C40	duplication
scaffold_283	50125	51875	C40	deletion	NHR	46593	52093	11.3633	0.37	1.91939	0	-
scaffold_283	57500	69375	C155	duplication
scaffold_283	58250	63250	C40	deletion
scaffold_283	65375	68000	C376	deletion
scaffold_283	83000	84000	C380	deletion	NHR	79825	85550	10.0857	0.42	1.97449	0	-
scaffold_285	51125	61875	C151	duplication
scaffold_285	78625	81625	C281	deletion
scaffold_285	80000	83750	C178	deletion
scaffold_289	10589	10590	C34	SNP
scaffold_289	65185	65186	C24	SNP
scaffold_29	192500	202250	C376	duplication
scaffold_29	193000	201625	C40	deletion	NHR	193616	201860	10.1776	0.39	1.97551	2	AA
scaffold_29	202875	205750	C40	deletion
scaffold_29	213625	218125	C40	deletion	NHR	213654	217701	9.37449	0.36	1.91735	4	AAAA
scaffold_29	234250	235875	C40	deletion	NHR	232449	237393	11.249	0.49	1.9398	0	-
scaffold_29	471251	471252	C37	SNP
scaffold_29	782883	782884	C07	SNP
scaffold_29	960587	960588	C352	SNP
scaffold_29	1023744	1023745	C391	SNP
scaffold_29	1135874	1138750	C07	deletion
scaffold_29	1201562	1201563	C36	SNP
scaffold_3	67750	71625	C380	duplication
scaffold_3	195715	195716	C299	SNP
scaffold_3	358640	358641	CC8	SNP
scaffold_3	579798	579799	C38	SNP
scaffold_3	639015	639016	C151	SNP
scaffold_3	741282	741283	C36	SNP
scaffold_3	786366	786367	C380	SNP
scaffold_3	806715	806716	C178	SNP
scaffold_3	806716	806717	C178	SNP
scaffold_3	823458	823459	C187	SNP
scaffold_3	1046335	1046336	C391	SNP
scaffold_3	1069909	1069910	C280	SNP
scaffold_3	1169070	1169071	CC3	SNP
scaffold_3	1290125	1292250	C251	deletion	NHR	1288497	1292887	10.3786	0.27	1.77245	2	TT
scaffold_3	1326982	1326983	C02	SNP
scaffold_3	1329947	1329948	C170	SNP
scaffold_3	1592665	1592666	C187	SNP
scaffold_3	1610643	1610644	C08	SNP
scaffold_3	1915036	1915037	C181	SNP
scaffold_3	2137820	2137821	C254	SNP
scaffold_3	2152728	2152729	C284	SNP
scaffold_3	2211402	2211403	C151	SNP
scaffold_3	2274329	2274330	C155	SNP
scaffold_3	2433487	2433488	C13	SNP
scaffold_3	2521391	2521392	C21	SNP
scaffold_3	2627053	2627054	C281	SNP
scaffold_3	2679617	2679618	C391	SNP
scaffold_3	3139058	3139059	C14	SNP
scaffold_3	3165346	3165347	C178	SNP
scaffold_3	3227652	3227653	C376	SNP
scaffold_3	3325606	3325607	C284	SNP
scaffold_3	3325607	3325608	C284	SNP
scaffold_3	3423204	3423205	C170	SNP
scaffold_3	3431520	3431521	C170	SNP
scaffold_3	3449333	3449334	C07	SNP
scaffold_3	3510125	3515125	C251	duplication
scaffold_3	3515250	3518875	C251	duplication
scaffold_3	3575907	3575908	C372	SNP
scaffold_3	3702963	3702964	C280	SNP
scaffold_3	3737403	3737404	C151	SNP
scaffold_30	141929	141930	C06	SNP
scaffold_30	288457	288458	C155	SNP
scaffold_30	289011	289012	C14	SNP
scaffold_30	347216	347217	C36	SNP
scaffold_30	421625	424500	C376	deletion	NHR	421259	425833	10.3612	0.25	1.8051	0	-
scaffold_30	429509	429510	C364	SNP
scaffold_30	496917	496918	C182	SNP
scaffold_30	859750	863125	C20	deletion
scaffold_30	898750	901875	C380	duplication
scaffold_30	1048375	1054250	C40	duplication	NAHR
scaffold_30	1137500	1146375	C364	deletion
scaffold_305	0	1000	C376	deletion
scaffold_305	22875	26875	C376	deletion	NHR	23188	26861	11.0969	0.31	1.76224	0	-
scaffold_305	26875	29750	C40	deletion	NHR	26546	29993	10.3878	0.46	1.96224	0	-
scaffold_305	27375	30000	C376	duplication
scaffold_305	30375	32875	C376	duplication
scaffold_305	42500	45500	C376	deletion	NHR	43234	44856	11.1449	0.32	1.80714	0	-
scaffold_305	55250	59750	C376	duplication
scaffold_305	88625	98375	C376	duplication	NAHR
scaffold_307	46956	46957	C281	SNP
scaffold_31	305999	307625	C02	deletion	NHR	305947	310984	11.1571	0.41	1.85102	0	-
scaffold_31	350250	350251	C352	SNP
scaffold_31	355262	355263	CC3	SNP
scaffold_31	366948	366949	C39	SNP
scaffold_31	613492	613493	C36	SNP
scaffold_31	665916	665917	C355	SNP
scaffold_31	828326	828327	C376	SNP
scaffold_31	857613	857614	C16	SNP
scaffold_31	894293	894294	C187	SNP
scaffold_31	955179	955180	C14	SNP
scaffold_31	975559	975560	C182	SNP
scaffold_31	1101375	1103875	C151	deletion
scaffold_31	1104250	1113250	C151	deletion
scaffold_31	1121500	1126750	C151	deletion
scaffold_32	38370	38371	C38	SNP
scaffold_32	412222	412223	C300	SNP
scaffold_32	427008	427009	C374	SNP
scaffold_32	508809	508810	CC3	SNP
scaffold_32	668995	668996	C20	SNP
scaffold_32	867759	867760	C20	SNP
scaffold_32	914024	914025	C372	SNP
scaffold_32	1108750	1114250	C02	duplication
scaffold_328	24750	27375	C178	deletion
scaffold_328	74875	76875	C178	deletion	NAHR	74854	76653	11.4745	0.29	1.76224	2	TT
scaffold_33	31186	31187	C167	SNP
scaffold_33	154500	157875	C372	deletion
scaffold_33	289464	289465	C03	SNP
scaffold_33	538402	538403	C151	SNP
scaffold_33	710750	719250	CC4	duplication
scaffold_33	717266	717267	C151	SNP
scaffold_331	33625	36875	C380	deletion
scaffold_333	33375	35750	C380	duplication
scaffold_334	42750	53500	C24	duplication
scaffold_337	8875	10000	C170	deletion	NHR	8201	12678	9.83776	0.54	2.12551	1	C
scaffold_34	358750	362125	C380	duplication
scaffold_34	362375	364750	C380	duplication
scaffold_34	685125	688625	C34	duplication
scaffold_34	719787	719788	C378	INDEL
scaffold_34	724632	724633	C167	SNP
scaffold_34	810168	810169	C281	SNP
scaffold_34	969500	974500	C40	deletion	NHR	969921	974389	11.65	0.39	1.75	5	ATACT
scaffold_34	969625	974500	C376	duplication	NAHR
scaffold_34	972250	979125	C178	deletion
scaffold_34	1029250	1033500	C380	duplication
scaffold_34	1056875	1060500	C280	deletion	NHR	1056645	1059535	10.8684	0.35	1.84694	0	-
scaffold_34	1082875	1087500	C280	deletion
scaffold_35	150941	150942	C34	SNP
scaffold_35	166675	166676	C18	SNP
scaffold_35	504875	510125	C02	duplication
scaffold_35	619037	619038	C06	SNP
scaffold_35	795750	797750	C251	deletion	NHR	795314	797299	11.7276	0.3	1.72449	1	T
scaffold_35	795750	797750	C280	deletion	NHR	795314	797299	11.7276	0.3	1.72449	1	T
scaffold_35	978875	982000	C378	duplication
scaffold_35	1046910	1046911	C299	SNP
scaffold_355	65004	65005	C38	SNP
scaffold_359	22902	22903	C155	SNP
scaffold_36	68875	68876	C14	INDEL
scaffold_36	71699	71700	C24	INDEL
scaffold_36	180000	187875	C34	duplication
scaffold_36	288250	290500	C372	deletion
scaffold_36	399322	399323	C20	SNP
scaffold_36	614784	614785	C280	SNP
scaffold_36	638452	638453	C18	SNP
scaffold_36	826079	826080	C178	SNP
scaffold_36	833518	833519	C37	SNP
scaffold_36	858250	865500	C44	duplication
scaffold_36	1049125	1056625	C376	duplication
scaffold_36	1050750	1056500	C40	deletion	NHR	1050807	1055282	10.9531	0.48	1.96735	0	-
scaffold_36	1137474	1137475	C151	SNP
scaffold_37	51500	54250	C380	deletion	NHR	50803	53569	10.3592	0.43	1.93571	2	GC
scaffold_37	88000	96625	C380	deletion	NHR	87585	94830	10.5929	0.32	1.88776	3	AAG
scaffold_37	148500	158000	C380	duplication
scaffold_37	158125	161125	C187	deletion
scaffold_37	213999	214000	C01	SNP
scaffold_37	233500	238750	C380	duplication
scaffold_37	263750	271875	C380	duplication
scaffold_37	397125	405500	C380	deletion	NHR	393925	406446	9.9	0.37	1.83776	0	-
scaffold_37	455500	457875	C380	deletion
scaffold_37	504000	513500	C380	deletion	NHR	504138	512974	11.9949	0.32	1.71327	5	ATATT
scaffold_37	640750	644375	C380	deletion	NHR	640409	645418	10.5092	0.36	1.76327	1	G
scaffold_37	667625	675875	C380	deletion	NHR	667833	675956	11.7388	0.4	1.80204	1	G
scaffold_37	699165	699166	C21	SNP
scaffold_37	744750	758500	C380	deletion	NHR	745161	759510	10.7704	0.35	1.80612	1	T
scaffold_37	760250	761250	C364	duplication
scaffold_37	795750	804875	C380	deletion	NHR	795730	800375	10.6531	0.41	1.89796	1	A
scaffold_37	838750	849375	C380	deletion	NHR	839020	849391	10.6888	0.32	1.80918	0	-
scaffold_37	858750	864250	C380	deletion	NAHR	858882	864603	10.3816	0.55	2.08571	0	-
scaffold_37	958873	958874	C178	SNP
scaffold_38	39500	43125	C376	deletion	NHR	38680	43041	10.2908	0.48	2.04388	1	A
scaffold_38	160500	166250	C34	duplication
scaffold_38	193500	197625	C380	duplication
scaffold_38	197875	202000	C380	duplication										1
scaffold_38	213000	224125	C380	duplication										1
scaffold_38	232500	239500	C380	duplication
scaffold_38	276750	281875	C380	duplication
scaffold_38	348164	348165	C03	INDEL
scaffold_38	403750	414250	C380	duplication
scaffold_38	407851	407852	C284	SNP
scaffold_38	421754	421755	C280	SNP
scaffold_38	498875	500250	C380	duplication
scaffold_38	524250	532625	C380	duplication										1
scaffold_38	532750	544500	C380	duplication										1
scaffold_38	644625	651375	C380	duplication										1
scaffold_38	693600	693601	C36	SNP
scaffold_38	711268	711269	C299	SNP
scaffold_38	719245	719246	C178	SNP
scaffold_38	964875	967125	C380	duplication										1
scaffold_38	1001000	1006750	C380	duplication										1
scaffold_382	10375	13125	C178	deletion	NHR	9238	13150	11.0541	0.27	1.73367	1	T
scaffold_382	13000	16500	CC10	duplication
scaffold_39	62375	64375	C380	duplication										1
scaffold_39	389354	389355	C37	SNP
scaffold_39	566124	567375	C02	deletion	NHR	565206	567064	10.7194	0.41	1.96327	1	G
scaffold_39	723500	724875	C151	deletion	NHR	721356	726474	10.7531	0.23	1.7449	0	-
scaffold_39	780544	780545	C38	SNP
scaffold_39	847333	847334	C376	SNP
scaffold_39	877856	877857	C254	SNP
scaffold_39	883750	884875	C281	deletion
scaffold_39	921769	921770	C13	SNP
scaffold_39	1028110	1028111	C372	SNP
scaffold_4	90959	90960	C08	SNP
scaffold_4	90961	90962	C08	SNP
scaffold_4	90965	90966	C08	SNP
scaffold_4	106625	109000	C182	deletion
scaffold_4	120296	120297	C178	SNP
scaffold_4	221748	221749	C01	SNP
scaffold_4	226031	226032	C355	SNP
scaffold_4	227596	227597	C182	SNP
scaffold_4	264802	264803	C37	SNP
scaffold_4	264804	264805	C37	SNP
scaffold_4	347000	350875	C372	deletion
scaffold_4	655750	659125	C178	deletion
scaffold_4	718243	718244	C25	SNP
scaffold_4	922962	922963	C08	SNP
scaffold_4	1351875	1356500	C372	deletion	NHR	1351934	1358902	11.0439	0.32	1.78673	0	-
scaffold_4	1624865	1624866	C167	SNP
scaffold_4	1768476	1768477	C364	SNP
scaffold_4	1773641	1773642	C254	SNP
scaffold_4	2182220	2182221	C251	SNP
scaffold_4	2193183	2193184	C280	SNP
scaffold_4	2619974	2619975	CC10	SNP
scaffold_4	2688513	2688514	C40	SNP
scaffold_4	2699651	2699652	C299	SNP
scaffold_4	2706625	2710250	C380	deletion
scaffold_4	2989488	2989489	C155	SNP
scaffold_4	3025458	3025459	C35	SNP
scaffold_40	81375	89000	C380	duplication	NAHR
scaffold_40	198251	198252	C25	SNP
scaffold_40	401640	401641	C35	SNP
scaffold_40	706625	711125	C380	duplication										1
scaffold_40	712875	743125	C380	duplication										1
scaffold_40	732090	732091	C187	SNP
scaffold_40	743125	755125	C380	duplication										1
scaffold_40	766875	772625	C380	duplication
scaffold_40	771674	771675	C155	SNP
scaffold_40	782000	787500	C380	duplication
scaffold_40	787875	800125	C380	duplication										1
scaffold_40	821250	829125	C380	duplication
scaffold_40	842625	852750	C380	duplication										1
scaffold_40	879000	884375	C380	duplication
scaffold_40	887125	897625	C380	duplication										1
scaffold_40	900875	904250	C380	duplication
scaffold_40	934750	939375	C380	duplication
scaffold_40	939375	944500	C380	duplication										1
scaffold_40	957750	962250	C380	duplication
scaffold_40	998125	1002250	C380	duplication										1
scaffold_40	1004750	1006250	C380	duplication
scaffold_402	20793	20794	C352	INDEL
scaffold_405	33024	33025	C07	SNP
scaffold_406	35375	37625	C376	deletion	NHR	33733	37278	10.7786	0.44	1.73878	0	-
scaffold_407	37771	37772	C178	INDEL
scaffold_41	36125	39750	C355	deletion	NHR	36856	39244	10.05	0.3	1.89592	1	T
scaffold_41	323000	329000	C300	deletion
scaffold_41	353250	367000	C291	duplication
scaffold_41	401028	401029	C254	SNP
scaffold_41	441077	441078	CC11	SNP
scaffold_41	455297	455298	C256	SNP
scaffold_41	464983	464984	CC3	SNP
scaffold_41	467750	471125	C372	deletion	NHR	466690	472469	11.8388	0.27	1.68061	0	-
scaffold_41	488742	488743	C24	SNP
scaffold_41	488743	488744	C24	SNP
scaffold_41	507767	507768	C178	SNP
scaffold_41	521295	521296	C256	SNP
scaffold_41	567125	585000	C44	duplication
scaffold_41	687230	687231	C178	SNP
scaffold_41	698756	698757	C299	SNP
scaffold_41	745249	745250	C16	SNP
scaffold_41	1010402	1010403	C151	INDEL
scaffold_413	31000	37375	C170	duplication
scaffold_419	26282	26283	C170	SNP
scaffold_419	35124	36875	C02	deletion
scaffold_42	94875	96625	C151	deletion
scaffold_42	289470	289471	C251	SNP
scaffold_42	371768	371769	C378	INDEL
scaffold_42	484348	484349	C151	SNP
scaffold_42	653487	653488	C187	SNP
scaffold_42	917965	917966	C44	SNP
scaffold_42	1019500	1025250	C364	duplication
scaffold_422	23801	23802	C170	SNP
scaffold_422	40303	40304	C300	SNP
scaffold_422	40627	40628	C355	SNP
scaffold_43	3125	4750	C178	deletion
scaffold_43	3125	4750	CC10	deletion
scaffold_43	8875	19250	C151	duplication
scaffold_43	230750	236125	C151	deletion
scaffold_43	236125	239750	C151	deletion
scaffold_43	254827	254828	C178	SNP
scaffold_43	259000	270125	C151	deletion
scaffold_43	276928	276929	C364	SNP
scaffold_43	283750	306625	C151	deletion
scaffold_43	306875	329500	C151	deletion
scaffold_43	340125	346875	C151	deletion
scaffold_43	347250	361000	C151	deletion
scaffold_43	420626	420627	C291	SNP
scaffold_43	501391	501392	C391	SNP
scaffold_43	606305	606306	C254	SNP
scaffold_43	607333	607334	C44	SNP
scaffold_43	642438	642439	C155	SNP
scaffold_43	690500	697125	C151	duplication
scaffold_43	699000	705375	C151	duplication
scaffold_43	705375	728500	C151	duplication
scaffold_43	728500	756500	C151	duplication
scaffold_43	787125	803500	C151	duplication
scaffold_43	803500	817875	C151	duplication
scaffold_43	814563	814564	C251	SNP
scaffold_43	842250	851000	C151	deletion
scaffold_43	870750	885750	C151	deletion
scaffold_43	889625	896250	C151	deletion
scaffold_43	969125	976875	C151	deletion
scaffold_43	977000	980375	C151	deletion
scaffold_43	991080	991081	C376	SNP
scaffold_43	995250	1007875	C151	deletion
scaffold_43	1036875	1043625	C151	deletion
scaffold_436	28317	28318	C374	SNP
scaffold_44	85912	85913	CC8	SNP
scaffold_44	186997	186998	C187	SNP
scaffold_44	254038	254039	C167	SNP
scaffold_44	298625	306000	C364	duplication
scaffold_44	394411	394412	C06	SNP
scaffold_44	502276	502277	C20	SNP
scaffold_44	785244	785245	C18	SNP
scaffold_44	808192	808193	C187	SNP
scaffold_44	818712	818713	C280	SNP
scaffold_44	820875	832000	C44	duplication
scaffold_44	887310	887311	C178	INDEL
scaffold_44	990179	990180	C364	SNP
scaffold_45	23500	27250	C372	deletion
scaffold_45	27750	29250	C372	deletion
scaffold_45	103125	104625	C251	deletion	NHR	102741	103969	11.3939	0.41	1.83367	1	C
scaffold_45	129125	136375	C284	deletion	NHR	129628	135652	11.4224	0.35	1.78265	1	T
scaffold_45	129125	136375	C376	deletion	NHR	129628	135652	11.4224	0.35	1.78265	1	T
scaffold_45	129125	136375	C40	duplication										1
scaffold_45	132375	136375	C155	duplication
scaffold_45	137600	137601	C151	SNP
scaffold_45	137603	137604	C151	SNP
scaffold_45	196000	198500	C372	deletion
scaffold_45	541125	549375	C364	duplication
scaffold_45	584374	587750	C02	deletion
scaffold_45	627252	627253	C281	SNP
scaffold_45	698875	700375	C187	deletion
scaffold_45	797000	800500	C251	duplication
scaffold_45	797250	800375	C280	deletion	NHR	796969	799548	9.57857	0.44	2.04286	0	-
scaffold_45	837105	837106	C181	SNP
scaffold_45	884131	884132	C254	SNP
scaffold_452	7587	7588	C24	SNP
scaffold_452	29227	29228	C182	SNP
scaffold_46	211335	211336	C155	SNP
scaffold_46	294123	294124	C167	SNP
scaffold_46	295556	295557	C40	SNP
scaffold_46	299236	299237	C256	SNP
scaffold_46	301353	301354	C376	SNP
scaffold_46	435250	437125	C178	deletion
scaffold_46	466447	466448	C178	SNP
scaffold_46	492250	495875	CC11	deletion
scaffold_46	498633	498634	C380	SNP
scaffold_46	878153	878154	C21	SNP
scaffold_46	955875	957625	C151	duplication
scaffold_47	259147	259148	C170	SNP
scaffold_47	350615	350616	C352	SNP
scaffold_47	497100	497101	C355	SNP
scaffold_47	566875	575750	C352	duplication
scaffold_47	577875	593625	C352	duplication
scaffold_47	756500	765750	C352	duplication
scaffold_47	767375	774250	C352	duplication
scaffold_47	867625	871750	C380	duplication
scaffold_47	881273	881274	C25	SNP
scaffold_47	909000	911875	C352	duplication
scaffold_47	935182	935183	C187	SNP
scaffold_48	8625	11625	C291	deletion	NHR	4923	11631	12.2888	0.21	1.6449	1	A
scaffold_48	26750	30250	C291	deletion
scaffold_48	46500	54500	C291	deletion
scaffold_48	74375	96000	C291	deletion
scaffold_48	96250	104250	C291	deletion
scaffold_48	124125	130250	C291	deletion
scaffold_48	124375	126875	C08	deletion	NHR	123499	128760	10.8184	0.32	1.85918	2	AA
scaffold_48	131625	140125	C291	deletion
scaffold_48	145000	151625	C291	deletion
scaffold_48	162625	168125	C291	deletion	NHR	162783	167290	11.449	0.4	1.97857	0	-
scaffold_48	169250	174000	C291	deletion
scaffold_48	181875	184375	C291	deletion
scaffold_48	214500	218500	C291	deletion	NHR	215961	218691	10.9041	0.34	1.76224	0	-
scaffold_48	226500	229125	C291	duplication
scaffold_48	242875	245375	C291	deletion
scaffold_48	252250	254625	C291	deletion
scaffold_48	253411	253412	C155	SNP
scaffold_48	255625	259750	C291	deletion	NHR	255753	258348	10.3857	0.47	1.94184	3	CCA
scaffold_48	262500	265000	C291	deletion	NHR	262885	266510	11.0398	0.35	1.83469	1	T
scaffold_48	265750	272250	C291	deletion
scaffold_48	277000	279875	C291	deletion	NHR	276817	278967	10.801	0.31	1.81327	1	T
scaffold_48	282750	286000	C291	deletion	NHR	282605	285997	11.0847	0.37	1.80714	0	-
scaffold_48	284366	284367	C35	SNP
scaffold_48	295000	299125	C291	deletion
scaffold_48	331000	336250	C291	deletion
scaffold_48	339125	347125	C291	deletion	NHR	337164	346961	11.6276	0.32	1.81429	2	TG
scaffold_48	353000	358750	C291	deletion
scaffold_48	361625	364250	C291	deletion
scaffold_48	395625	398000	C291	deletion
scaffold_48	398125	405250	C291	deletion
scaffold_48	405375	408875	C291	deletion
scaffold_48	406186	406187	C182	SNP
scaffold_48	408875	413250	C291	deletion
scaffold_48	414625	418000	C291	deletion
scaffold_48	462875	464500	C187	deletion
scaffold_48	469699	469700	C18	SNP
scaffold_48	575500	584625	C291	duplication
scaffold_48	589500	594125	C378	duplication	NAHR
scaffold_48	615000	620250	C151	deletion
scaffold_48	644106	644107	C391	SNP
scaffold_48	664375	673500	C291	duplication
scaffold_48	706250	713125	C44	duplication
scaffold_48	752375	755500	C376	deletion
scaffold_48	752375	756750	C40	duplication
scaffold_48	796000	807625	C291	duplication
scaffold_48	919250	925750	C291	duplication
scaffold_49	48500	58625	C39	duplication
scaffold_49	194648	194649	C38	SNP
scaffold_49	305853	305854	C40	SNP
scaffold_49	434026	434027	C38	SNP
scaffold_49	465250	468625	C372	deletion	NHR	465263	469469	11.1673	0.4	1.89286	1	C
scaffold_49	496861	496862	C254	SNP
scaffold_49	612750	613750	C187	deletion
scaffold_49	830397	830398	C300	SNP
scaffold_4977	2908	2909	C40	INDEL
scaffold_5	70660	70661	C151	SNP
scaffold_5	102492	102493	C14	SNP
scaffold_5	400235	400236	C352	SNP
scaffold_5	464061	464062	C40	SNP
scaffold_5	489890	489891	C38	SNP
scaffold_5	504875	504876	C170	SNP
scaffold_5	763883	763884	C155	SNP
scaffold_5	764007	764008	C254	SNP
scaffold_5	980750	995750	C291	deletion
scaffold_5	1077250	1081375	C291	deletion
scaffold_5	1107000	1113625	C20	deletion
scaffold_5	1168265	1168266	C352	SNP
scaffold_5	1181146	1181147	C284	SNP
scaffold_5	1501953	1501954	C181	SNP
scaffold_5	1501957	1501958	C181	SNP
scaffold_5	1514249	1514250	C17	INDEL
scaffold_5	1607625	1612125	C34	duplication
scaffold_5	1634937	1634938	C21	SNP
scaffold_5	1672012	1672013	CC11	SNP
scaffold_5	1875988	1875989	C291	SNP
scaffold_5	1975625	1982125	C178	duplication
scaffold_5	2030949	2030950	C291	SNP
scaffold_5	2075412	2075413	C167	SNP
scaffold_5	2334164	2334165	C20	SNP
scaffold_5	2417828	2417829	C39	SNP
scaffold_5	2489625	2496000	C170	deletion
scaffold_5	2489625	2496000	CC10	deletion
scaffold_5	2489875	2496000	C178	deletion
scaffold_50	166007	166008	C254	SNP
scaffold_50	286125	292500	C291	deletion	NHR	286351	294938	10.8857	0.42	1.94082	3	GCT
scaffold_50	361375	363625	C380	duplication
scaffold_50	552125	555250	C178	deletion
scaffold_50	767750	773250	C167	deletion
scaffold_50	767875	776000	C44	duplication	NAHR
scaffold_5023	1366	1367	C21	SNP
scaffold_505	16214	16215	C25	SNP
scaffold_505	34125	36125	C376	deletion
scaffold_51	120875	122750	C281	deletion
scaffold_51	442022	442023	C39	SNP
scaffold_51	683125	685750	C20	deletion	NHR	683453	685714	10.9806	0.48	1.98469	0	-
scaffold_51	751750	758125	CC9	deletion	NHR	754530	759597	10.249	0.28	1.79796	0	-
scaffold_51	760000	764375	CC9	deletion	NHR	759931	762668	10.6102	0.48	1.99082	0	-
scaffold_51	765625	769375	CC9	deletion	NHR	765652	769483	11.15	0.33	1.82551	0	-
scaffold_51	807500	809125	CC9	deletion	NHR	804049	809152	11.1684	0.34	1.73776	1	A
scaffold_51	809250	818000	C12	duplication	NAHR
scaffold_51	815500	824500	C374	duplication
scaffold_51	820125	825125	C182	deletion
scaffold_51	821875	842250	CC9	deletion	NHR	822906	842378	11.5082	0.23	1.70714	3	TTT
scaffold_51	845375	850875	CC9	deletion
scaffold_51	851125	856500	CC9	deletion	NHR	851592	856450	10.4776	0.4	1.92755	3	AAA
scaffold_52	100152	100153	C300	SNP
scaffold_52	317625	319250	C378	deletion
scaffold_52	479362	479363	C24	SNP
scaffold_52	495875	510500	CC10	duplication
scaffold_52	547184	547185	C380	SNP
scaffold_52	549181	549182	C378	SNP
scaffold_52	824750	830125	C380	duplication										1
scaffold_52	838250	842000	C291	deletion	NHR	837564	842579	10.5765	0.34	1.82041	1	C
scaffold_5234	3158	3159	C151	SNP
scaffold_53	83832	83833	C35	SNP
scaffold_53	159762	159763	C151	SNP
scaffold_53	264875	268250	C372	deletion
scaffold_53	296941	296942	C18	SNP
scaffold_53	305125	307125	C374	deletion	NHR	305560	306930	10.5071	0.44	1.9551	0	-
scaffold_53	308874	310250	C02	deletion	NHR	308186	311688	11.701	0.26	1.76531	6	AAAATA
scaffold_53	508117	508118	C155	SNP
scaffold_53	600258	600259	C187	SNP
scaffold_53	725250	729875	C380	duplication	NAHR
scaffold_53	769772	769773	C256	SNP
scaffold_53	776441	776442	C35	SNP
scaffold_53	788587	788588	C178	SNP
scaffold_54	107000	117000	C151	duplication
scaffold_54	197500	200750	C02	duplication
scaffold_54	197625	201250	C170	deletion
scaffold_54	207113	207114	C355	SNP
scaffold_54	400250	402000	C280	deletion	NHR	401097	402640	11.5194	0.31	1.75612	1	G
scaffold_54	519149	519150	C40	SNP
scaffold_54	567394	567395	C171	SNP
scaffold_54	585434	585435	C300	SNP
scaffold_54	605625	607625	C02	deletion
scaffold_54	776750	779875	C378	duplication
scaffold_5408	778	779	C12	SNP
scaffold_55	303131	303132	C13	SNP
scaffold_55	303132	303133	C13	SNP
scaffold_55	486001	486002	C34	INDEL
scaffold_55	579750	586125	C376	deletion	NHR	579417	585663	11.4582	0.36	1.74388	0	-
scaffold_55	580250	588000	C40	duplication	NAHR									1
scaffold_55	580500	586875	C155	duplication	NAHR
scaffold_55	618250	619625	C372	deletion
scaffold_56	111875	113625	C372	deletion	NHR	111593	113411	10.8816	0.3	1.7602	2	TT
scaffold_56	133418	133419	C13	SNP
scaffold_56	236309	236310	C280	SNP
scaffold_56	330927	330928	C16	SNP
scaffold_56	352750	355625	C378	duplication	NAHR									1
scaffold_56	353000	357000	C374	deletion
scaffold_56	393626	393627	C284	SNP
scaffold_56	393627	393628	C284	SNP
scaffold_56	463482	463483	C13	SNP
scaffold_56	667826	667827	C281	SNP
scaffold_56	709585	709586	CC3	SNP
scaffold_56	786822	786823	C187	SNP
scaffold_57	253500	257250	C378	duplication										1
scaffold_57	384185	384186	C25	SNP
scaffold_571	33884	33885	C291	SNP
scaffold_58	115625	117875	C291	deletion
scaffold_58	370500	378000	C291	duplication
scaffold_58	397448	397449	C20	SNP
scaffold_58	434002	434003	C372	SNP
scaffold_58	441249	441250	C284	SNP
scaffold_58	469447	469448	C13	SNP
scaffold_58	551250	553625	C40	duplication
scaffold_58	703375	707875	C380	duplication
scaffold_59	94625	99625	C171	deletion
scaffold_59	95250	98500	C376	duplication
scaffold_59	96625	99500	C40	deletion	NHR	95024	99103	11.5755	0.19	1.73061	0	-
scaffold_59	683625	690750	C380	duplication										1
scaffold_59	690875	693000	C380	duplication										1
scaffold_598	3571	3572	C300	SNP
scaffold_6	13422	13423	C170	SNP
scaffold_6	139921	139922	C254	SNP
scaffold_6	446416	446417	C380	SNP
scaffold_6	603172	603173	C36	SNP
scaffold_6	606036	606037	C281	SNP
scaffold_6	681913	681914	C34	SNP
scaffold_6	937875	943000	C355	deletion
scaffold_6	938625	940375	C251	deletion	NHR	938769	942599	10.1316	0.47	2.05612	0	-
scaffold_6	971589	971590	C21	SNP
scaffold_6	1158701	1158702	C24	SNP
scaffold_6	1290250	1292500	C170	deletion
scaffold_6	1484639	1484640	C167	SNP
scaffold_6	1496750	1499000	C40	deletion	NHR	1496637	1499087	9.49592	0.33	1.89592	0	-
scaffold_6	1554341	1554342	C352	SNP
scaffold_6	1578629	1578630	C178	SNP
scaffold_6	1578639	1578640	C178	SNP
scaffold_6	1824593	1824594	C167	SNP
scaffold_6	1824594	1824595	C167	SNP
scaffold_6	1824597	1824598	C167	SNP
scaffold_6	1980189	1980190	C44	SNP
scaffold_6	2217035	2217036	C355	SNP
scaffold_6	2382610	2382611	C300	SNP
scaffold_60	0	1875	C178	deletion
scaffold_60	15500	18500	C02	deletion
scaffold_60	56366	56367	C12	SNP
scaffold_60	132875	139375	C02	duplication
scaffold_60	294625	299125	C380	deletion	NHR	295188	299527	11.0327	0.31	1.79082	0	-
scaffold_60	343750	348625	C380	deletion	NHR	343687	348757	11.3316	0.41	1.88673	0	-
scaffold_60	353500	358000	C380	deletion
scaffold_60	396625	399000	CC3	deletion
scaffold_60	696625	716000	C380	deletion	NHR	693502	722115	10.2765	0.51	2.07041	0	-
scaffold_60	699303	699304	C372	SNP
scaffold_60	716000	722375	C380	deletion
scaffold_60	734500	744125	C380	deletion
scaffold_60	744125	749000	C380	deletion
scaffold_61	148746	148747	CC8	SNP
scaffold_61	259139	259140	C300	SNP
scaffold_61	657625	662125	C39	deletion	NHR	657129	660865	10.3459	0.44	1.93163	0	-
scaffold_62	25250	26375	C178	deletion	NHR	21655	27367	11.3286	0.38	1.85714	0	-
scaffold_62	43502	43503	C25	SNP
scaffold_62	51863	51864	C352	SNP
scaffold_62	55750	57250	C181	deletion	NHR	55088	57928	12.4071	0.44	1.83163	0	-
scaffold_62	265240	265241	C178	SNP
scaffold_62	282719	282720	C391	SNP
scaffold_62	562816	562817	C187	SNP
scaffold_62	618750	624875	C372	duplication
scaffold_62	633375	637125	C170	deletion
scaffold_62	661622	661623	C170	SNP
scaffold_62	701394	701395	C13	SNP
scaffold_63	62691	62692	C374	SNP
scaffold_63	364993	364994	C352	SNP
scaffold_63	364994	364995	C352	SNP
scaffold_63	430474	430475	C151	SNP
scaffold_63	645199	645200	C25	SNP
scaffold_64	105000	107000	C372	deletion	NHR	103223	106651	11.2163	0.25	1.71633	0	-
scaffold_64	440478	440479	C299	SNP
scaffold_64	440479	440480	C299	SNP
scaffold_64	448750	451250	C372	deletion
scaffold_64	491817	491818	C25	SNP
scaffold_64	533339	533340	C281	SNP
scaffold_64	593875	596750	C372	deletion	NHR	593655	596374	10.6959	0.39	1.89082	1	T
scaffold_648	15250	17875	C352	deletion
scaffold_648	20625	22500	C352	duplication
scaffold_65	109500	111875	C178	deletion
scaffold_65	201125	203250	C355	deletion
scaffold_65	243714	243715	C12	SNP
scaffold_65	325479	325480	C364	SNP
scaffold_65	372776	372777	C38	SNP
scaffold_65	468713	468714	C35	SNP
scaffold_65	557250	565625	C378	duplication	NAHR
scaffold_65	682735	682736	C14	SNP
scaffold_65	698250	699500	C251	deletion	NHR	696680	703357	11.2643	0.3	1.72449	1	A
scaffold_655	13250	13251	C170	SNP
scaffold_657	7813	7814	C35	SNP
scaffold_66	12125	14250	C40	deletion
scaffold_66	12750	14500	C376	duplication
scaffold_66	39750	42375	C380	duplication
scaffold_66	65750	73000	C380	duplication
scaffold_66	301777	301778	C284	SNP
scaffold_66	376790	376791	C38	SNP
scaffold_66	428966	428967	C155	SNP
scaffold_66	785625	788750	C372	deletion	NHR	786456	788173	11.7459	0.23	1.75102	0	-
scaffold_668	45388	45389	C178	SNP
scaffold_6697	1423	1424	C155	SNP
scaffold_67	6000	9375	C40	deletion	NHR	6061	9658	11.3531	0.31	1.7898	0	-
scaffold_67	48574	48575	C281	INDEL
scaffold_67	49250	50750	C376	deletion	NHR	47282	53000	10.7122	0.35	1.82449	2	CA
scaffold_67	49250	51000	C40	duplication
scaffold_67	54750	57375	C40	deletion	NAHR	55319	56561	10.6408	0.49	2.05102	2	AC
scaffold_67	60375	62750	C40	deletion	NHR	59480	62942	10.8643	0.46	1.94184	1	A
scaffold_67	81500	82875	C40	deletion
scaffold_67	112875	113625	C40	deletion	UNSURE	110280	116246	10.698	0.3	1.85306	9	AAAAAAAAA
scaffold_67	124750	125750	C40	deletion	NHR	123422	126169	10.8163	0.38	1.73367	0	-
scaffold_67	143875	153625	C40	duplication
scaffold_67	148250	160875	C44	duplication
scaffold_67	157250	160875	C40	deletion	NHR	156703	161224	10.7459	0.37	1.88265	0	-
scaffold_67	162625	165375	C40	duplication										1
scaffold_67	162750	165375	C376	deletion	NHR	163542	165055	10.4765	0.49	1.9602	0	-
scaffold_67	165875	168625	C40	deletion	NHR	166520	169419	11.2745	0.29	1.74592	0	-
scaffold_67	190375	195500	C40	deletion
scaffold_67	199500	202250	C40	deletion	NHR	199232	201378	10.4898	0.3	1.75612	4	TATT
scaffold_67	202250	204125	C40	duplication
scaffold_67	202375	204625	C376	deletion	NHR	202369	205448	11.3929	0.36	1.84286	1	A
scaffold_67	213625	219375	C40	deletion
scaffold_67	214000	221500	C376	duplication
scaffold_67	219375	221500	C40	deletion
scaffold_67	228750	236625	C40	deletion
scaffold_67	228750	247250	C376	duplication
scaffold_67	236750	246875	C40	deletion	NHR	238271	248238	10.801	0.47	1.94796	0	-
scaffold_67	247500	263500	C376	duplication										1
scaffold_67	247625	263625	C40	deletion
scaffold_67	285250	287125	C40	deletion
scaffold_67	289750	291000	C40	deletion
scaffold_67	304625	308750	C40	deletion	NHR	302924	308465	11.5582	0.32	1.80816	1	A
scaffold_67	304750	309000	C376	duplication										1
scaffold_67	327000	327875	C40	deletion
scaffold_67	365000	369375	C40	deletion	NHR	363340	369012	11.2888	0.34	1.76122	1	T
scaffold_67	365250	372375	C376	duplication
scaffold_67	373625	377500	C40	deletion	NHR	372990	378516	11.1255	0.34	1.81122	0	-
scaffold_67	380125	381375	C40	deletion
scaffold_67	382000	383750	C40	deletion
scaffold_67	387625	391000	C40	deletion
scaffold_67	387625	391375	C376	duplication
scaffold_67	430375	435875	C40	duplication
scaffold_67	480375	483125	C376	deletion	NHR	481303	484117	11.2796	0.44	1.8551	0	-
scaffold_67	483000	486750	C40	deletion
scaffold_67	492750	494125	C40	deletion
scaffold_67	504750	507500	C40	deletion	NHR	504701	508137	11.2541	0.36	1.85408	0	-
scaffold_67	508375	513250	C40	duplication
scaffold_67	531875	540750	C40	deletion
scaffold_67	552750	556625	C40	duplication
scaffold_67	572125	574000	C376	deletion	NHR	571396	574792	10.2612	0.37	1.86735	1	T
scaffold_67	572125	583375	C40	duplication										1
scaffold_67	615500	622250	C40	deletion	NHR	614969	622604	10.0969	0.35	1.81633	1	T
scaffold_67	633250	640000	C376	deletion
scaffold_67	633250	647125	C40	duplication										1
scaffold_67	640125	649250	C376	deletion
scaffold_67	647125	648875	C40	duplication
scaffold_67	649500	650500	C376	deletion
scaffold_67	651125	656250	C376	deletion	NHR	649265	656147	11.3143	0.31	1.7602	0	-
scaffold_67	651125	656750	C40	duplication										1
scaffold_67	669250	670625	C376	deletion	NHR	669231	670370	10.6327	0.55	2.14796	0	-
scaffold_67	673000	675250	C376	deletion	NHR	672290	674496	10.5224	0.43	1.84694	1	A
scaffold_67	681375	693375	C40	duplication
scaffold_67	681500	699750	C24	duplication
scaffold_67	709250	713750	C251	deletion	NHR	710115	714189	11.4776	0.48	2.01429	1	G
scaffold_67	709250	713750	C355	deletion	NHR	710115	714189	11.4776	0.48	2.01429	1	G
scaffold_67	715125	721500	C40	duplication
scaffold_68	157875	166625	C34	duplication	NAHR
scaffold_68	183338	183339	C256	SNP
scaffold_68	207980	207981	C36	INDEL
scaffold_68	396217	396218	C36	SNP
scaffold_68	512068	512069	C280	SNP
scaffold_68	512347	512348	C151	SNP
scaffold_68	576500	585875	C291	deletion	NHR	572124	585494	11.0306	0.31	1.81531	0	-
scaffold_68	576750	582875	C34	duplication	NAHR
scaffold_68	586125	587625	C155	deletion
scaffold_68	586500	591375	C291	deletion	NHR	585517	590566	11.3276	0.23	1.76837	1	C
scaffold_68	617500	624375	C291	deletion	NHR	615846	625337	10.8092	0.52	2.0449	0	-
scaffold_68	648000	655250	C291	deletion
scaffold_68	662375	664125	C378	duplication
scaffold_69	32125	37500	C151	deletion	NHR	30829	37581	10.402	0.43	1.98367	0	-
scaffold_69	51118	51119	C151	SNP
scaffold_69	165375	172750	C21	duplication
scaffold_69	303625	311125	C378	duplication	NAHR									1
scaffold_69	407365	407366	C182	SNP
scaffold_69	482875	490625	C151	deletion
scaffold_69	521000	525125	C280	deletion
scaffold_69	547045	547046	C256	SNP
scaffold_69	564625	566375	C256	deletion	NHR	564447	566147	11.0122	0.39	1.75714	0	-
scaffold_7	24739	24740	C254	SNP
scaffold_7	50932	50933	C182	SNP
scaffold_7	180769	180770	C170	SNP
scaffold_7	900157	900158	C39	SNP
scaffold_7	947962	947963	C299	SNP
scaffold_7	981708	981709	CC8	SNP
scaffold_7	1096300	1096301	C281	SNP
scaffold_7	1368996	1368997	C291	SNP
scaffold_7	1548250	1550125	C02	deletion
scaffold_7	1849531	1849532	C291	SNP
scaffold_7	2198145	2198146	C37	SNP
scaffold_7	2225071	2225072	C181	SNP
scaffold_70	181658	181659	C181	SNP
scaffold_70	386926	386927	C178	SNP
scaffold_70	432304	432305	C281	SNP
scaffold_70	608645	608646	C355	SNP
scaffold_70	694387	694388	C254	SNP
scaffold_70	701598	701599	CC4	SNP
scaffold_71	292125	297125	C155	deletion
scaffold_71	477750	482000	C37	duplication										1
scaffold_7105	999	1000	C251	SNP
scaffold_718	8050	8051	C155	SNP
scaffold_72	41375	42625	C355	deletion
scaffold_72	137745	137746	C299	SNP
scaffold_72	320256	320257	C254	SNP
scaffold_73	123875	127625	C364	deletion	NHR	122636	128882	11.3296	0.42	1.86633	0	-
scaffold_73	265213	265214	C13	SNP
scaffold_73	413000	418500	C02	duplication
scaffold_73	510812	510813	C372	SNP
scaffold_74	0	1375	C178	deletion
scaffold_74	92137	92138	C155	SNP
scaffold_74	158247	158248	C284	SNP
scaffold_74	181366	181367	C08	SNP
scaffold_74	391301	391302	C08	SNP
scaffold_74	429000	430875	C02	deletion
scaffold_74	467750	469750	C372	deletion	NHR	465890	469382	11.5541	0.29	1.6898	2	TT
scaffold_74	512568	512569	C18	SNP
scaffold_75	141488	141489	C284	SNP
scaffold_75	178625	186125	C40	deletion	NHR	176879	184194	11.1582	0.29	1.8102	1	A
scaffold_75	179000	186375	C376	duplication										1
scaffold_75	179750	186625	C170	deletion
scaffold_75	264875	267750	C376	duplication	NAHR									1
scaffold_75	265000	267375	C40	deletion	NHR	264183	267353	10.8347	0.26	1.76224	1	T
scaffold_75	270250	273125	C376	deletion	NHR	266292	272545	11.2296	0.27	1.75816	0	-
scaffold_75	270250	273125	C40	duplication
scaffold_75	281874	283250	C02	deletion
scaffold_75	423875	429750	C376	duplication										1
scaffold_75	425000	429125	C40	deletion
scaffold_75	469125	471250	C40	deletion
scaffold_76	67710	67711	C01	SNP
scaffold_76	177645	177646	C24	SNP
scaffold_76	209541	209542	C151	SNP
scaffold_76	266201	266202	C254	SNP
scaffold_76	272046	272047	C378	SNP
scaffold_76	324756	324757	C01	SNP
scaffold_76	442973	442974	C151	SNP
scaffold_76	570551	570552	C380	SNP
scaffold_76	604327	604328	C300	SNP
scaffold_76	605380	605381	C374	SNP
scaffold_77	250590	250591	C170	SNP
scaffold_77	374066	374067	C08	SNP
scaffold_78	71625	75000	C291	duplication
scaffold_78	414625	419625	C380	duplication										1
scaffold_78	437196	437197	C151	SNP
scaffold_78	456310	456311	C16	SNP
scaffold_78	503084	503085	C17	SNP
scaffold_78	521625	528625	C376	duplication
scaffold_79	75524	75525	C151	SNP
scaffold_79	256000	258750	C178	deletion
scaffold_79	421374	424500	C02	deletion
scaffold_79	494316	494317	C352	SNP
scaffold_79	500083	500084	C155	SNP
scaffold_79	585359	585360	C281	SNP
scaffold_8	13500	27125	C151	deletion
scaffold_8	28625	40500	C151	deletion
scaffold_8	41125	49750	C151	deletion
scaffold_8	58000	59375	C182	deletion
scaffold_8	92750	102875	C151	duplication
scaffold_8	120875	137000	C151	duplication
scaffold_8	141500	154875	C151	duplication
scaffold_8	179000	196875	C151	duplication
scaffold_8	179125	181375	C40	deletion	NHR	178824	181167	10.1929	0.35	1.90204	1	T
scaffold_8	197375	208875	C151	duplication
scaffold_8	462881	462882	C38	SNP
scaffold_8	526483	526484	C155	INDEL
scaffold_8	557675	557676	C291	SNP
scaffold_8	760125	761250	C251	deletion
scaffold_8	887417	887418	C380	SNP
scaffold_8	917987	917988	C254	SNP
scaffold_8	922225	922226	C299	SNP
scaffold_8	954675	954676	C178	SNP
scaffold_8	1061067	1061068	C299	SNP
scaffold_8	1113590	1113591	C251	SNP
scaffold_8	1125293	1125294	C170	SNP
scaffold_8	1254722	1254723	C44	SNP
scaffold_8	1342202	1342203	C25	SNP
scaffold_8	1354537	1354538	C01	SNP
scaffold_8	1600606	1600607	C39	SNP
scaffold_8	1913339	1913340	C34	SNP
scaffold_8	1982750	1984000	C378	deletion
scaffold_8	2014680	2014681	C372	SNP
scaffold_8	2021500	2024125	C372	deletion
scaffold_8	2035678	2035679	C16	SNP
scaffold_8	2072125	2076250	C151	deletion
scaffold_8	2116478	2116479	C364	SNP
scaffold_80	250	4500	C352	duplication										1
scaffold_80	16734	16735	C35	SNP
scaffold_80	60625	67875	C352	duplication
scaffold_80	84625	86125	C352	deletion
scaffold_80	258625	261000	C352	deletion
scaffold_80	262265	262266	C155	SNP
scaffold_80	443000	445625	C352	deletion
scaffold_80	510625	514625	C352	duplication
scaffold_80	511000	514875	C187	deletion	NHR	511226	514769	10.5592	0.43	2.00918	0	-
scaffold_80	514375	516750	C376	deletion
scaffold_80	514625	516750	C352	duplication										1
scaffold_81	9375	10750	C380	duplication										1
scaffold_81	87500	90000	C352	deletion	NHR	87803	89859	9.87449	0.51	2.12245	0	-
scaffold_81	142875	145625	C380	duplication										1
scaffold_81	163250	165250	C376	deletion	NHR	163622	165442	11.0327	0.34	1.89796	1	T
scaffold_81	180737	180738	C284	SNP
scaffold_81	216500	220000	C376	deletion	NHR	217226	220515	11.9724	0.28	1.74082	2	AA
scaffold_81	235500	238250	C40	deletion	NHR	236371	240131	11.3918	0.45	1.8449	1	A
scaffold_81	235625	240125	C376	duplication										1
scaffold_81	241500	247000	C40	deletion	NHR	244058	247309	11.4857	0.33	1.75408	0	-
scaffold_81	256625	258750	C40	deletion	NHR	254980	258523	10.5367	0.39	1.84694	0	-
scaffold_81	271952	271953	C155	SNP
scaffold_81	285250	288250	C376	deletion
scaffold_81	292875	295500	C380	duplication
scaffold_81	339000	341625	C376	deletion	NHR	339823	341190	11.099	0.39	1.83776	0	-
scaffold_81	363750	369000	C352	duplication
scaffold_81	368736	368737	C178	INDEL
scaffold_81	371875	395125	C352	duplication
scaffold_81	384105	384106	C25	SNP
scaffold_81	401507	401508	C291	SNP
scaffold_81	402875	405875	C352	deletion	NHR	401058	405226	10.4276	0.38	1.89184	2	AA
scaffold_81	405875	408750	C352	deletion
scaffold_81	415250	418375	C352	deletion	NHR	416326	419157	11.9082	0.19	1.61837	1	A
scaffold_81	426750	453000	C352	deletion
scaffold_81	427634	427635	C378	SNP
scaffold_81	469250	478500	C352	deletion	NHR	470807	476396	11.0765	0.31	1.8602	0	-
scaffold_81	474947	474948	C170	SNP
scaffold_81	485500	487875	C352	deletion	NHR	485055	488764	11.2531	0.32	1.77959	0	-
scaffold_81	487125	489125	C376	deletion	NHR	487349	490347	12.15	0.31	1.7102	0	-
scaffold_81	492625	495625	C376	deletion	NHR	490100	495899	10.901	0.39	1.83061	0	-
scaffold_81	502875	508625	C376	deletion
scaffold_81	508375	512000	C40	duplication										1
scaffold_81	539750	541500	C352	deletion	NHR	540036	542291	11.2224	0.33	1.77959	4	ATTG
scaffold_81	546625	551125	C352	deletion
scaffold_812	5354	5355	C280	SNP
scaffold_812	5356	5357	C280	SNP
scaffold_816	12727	12728	C380	SNP
scaffold_82	154250	159750	C291	duplication
scaffold_82	186500	190250	C291	duplication
scaffold_82	491500	496750	C291	deletion
scaffold_82	506500	515500	C291	deletion
scaffold_82	515500	522250	C291	deletion
scaffold_82	516374	518250	C02	deletion
scaffold_82	522250	526125	C291	deletion
scaffold_82	525787	525788	C07	SNP
scaffold_82	526125	541250	C291	deletion
scaffold_82	526999	533625	C02	deletion
scaffold_82	541375	544875	C291	deletion
scaffold_82	546250	548875	C291	deletion
scaffold_83	206547	206548	C300	SNP
scaffold_83	430125	434125	C34	duplication
scaffold_84	97781	97782	C155	SNP
scaffold_84	151500	154875	C08	duplication
scaffold_84	489958	489959	C39	SNP
scaffold_85	66750	70375	C376	deletion
scaffold_85	66750	70625	C40	duplication
scaffold_85	71500	76625	C376	deletion	NHR	70398	76756	11.198	0.33	1.85408	3	AAA
scaffold_85	71500	77375	C40	duplication
scaffold_85	80125	81125	C376	deletion	NHR	77799	81077	11.1837	0.33	1.83776	0	-
scaffold_85	88875	90250	C376	deletion	NHR	85796	91602	11.151	0.42	1.90204	0	-
scaffold_85	90625	96375	C40	deletion	NHR	91592	95256	11.3092	0.39	1.92551	1	G
scaffold_85	100750	104500	C40	duplication
scaffold_85	103125	104750	C376	deletion	NHR	103143	107585	11.5367	0.26	1.72755	0	-
scaffold_85	184500	185875	C40	deletion
scaffold_85	363875	369125	C376	duplication
scaffold_85	364125	365500	C40	deletion
scaffold_85	365190	365191	C02	SNP
scaffold_85	447875	449000	C40	deletion
scaffold_85	468250	470000	C376	deletion	NHR	467494	469672	11.0367	0.37	1.83571	1	G
scaffold_85	474500	476500	C376	deletion	NHR	473595	476494	11.3622	0.42	1.74694	0	-
scaffold_85	483625	486500	C151	deletion
scaffold_85	484000	486625	C376	duplication
scaffold_85	505750	507875	C376	deletion
scaffold_86	57250	61625	C378	duplication										1
scaffold_86	138625	144000	C291	duplication
scaffold_86	367752	367753	C151	SNP
scaffold_86	367753	367754	C151	SNP
scaffold_86	367766	367767	C151	SNP
scaffold_86	367769	367770	C151	SNP
scaffold_86	367779	367780	C151	SNP
scaffold_86	449124	451625	C02	deletion
scaffold_87	11086	11087	C24	SNP
scaffold_87	172971	172972	C300	SNP
scaffold_87	307505	307506	C187	SNP
scaffold_87	316625	326625	C251	duplication
scaffold_87	433365	433366	C284	SNP
[truncated: 100 more rows]
