# Supplementary material for: Accelerated rates of large-scale mutations in the presence of copper and nickel
Source: HighWire-hosted journal article supplement (doi:10.1101/gr.234724.118), 2018-11-28
Supplement: Supplemental_Table_S3.xlsx [file Supplemental_Table_S3.xlsx]

## Sheet: TableS3
Supplemental Table S3: Protein-coding (singleton) genes found within deletions or duplications, indicating the proportion of overlap and the CNV overlapping it.
GeneID	Scaffold	Start	End	Prop	CNV Start	CNV End	Sample	Type
DAPPUDRAFT_309788	scaffold_1	2270539	2271218	1	2269500	2271750	C372	deletion
DAPPUDRAFT_299991	scaffold_1	253457	259198	0.0944251	252500	254000	C02	deletion
DAPPUDRAFT_300142	scaffold_1	2916324	2918561	0.641771	2917125	2920375	C372	deletion
DAPPUDRAFT_205384	scaffold_1	2919380	2921442	0.48229	2917125	2920375	C372	deletion
DAPPUDRAFT_299942	scaffold_1	3108387	3111046	0.700527	3108375	3110250	C178	deletion
DAPPUDRAFT_299963	scaffold_1	3878286	3879216	1	3875625	3882000	C372	deletion
DAPPUDRAFT_126671	scaffold_1	3879742	3880663	1	3875625	3882000	C372	deletion
DAPPUDRAFT_230132	scaffold_1	4180459	4181286	1	4175250	4192875	C171	duplication
DAPPUDRAFT_299981	scaffold_1	4187679	4189671	1	4175250	4192875	C171	duplication
DAPPUDRAFT_230132	scaffold_1	4180459	4181286	1	4175625	4189750	C181	duplication
DAPPUDRAFT_299981	scaffold_1	4187679	4189671	1	4175625	4189750	C181	duplication
DAPPUDRAFT_299813	scaffold_1	853135	854082	1	852375	854500	C02	deletion
DAPPUDRAFT_309592	scaffold_1	932329	934034	0.613263	931624	933375	C02	deletion
DAPPUDRAFT_314032	scaffold_10	1081047	1081347	1	1077125	1082625	C376	duplication
DAPPUDRAFT_300277	scaffold_10	1082250	1083385	0.329806	1077125	1082625	C376	duplication
DAPPUDRAFT_314032	scaffold_10	1081047	1081347	1	1077375	1082500	C40	deletion
DAPPUDRAFT_300277	scaffold_10	1082250	1083385	0.219577	1077375	1082500	C40	deletion
DAPPUDRAFT_237828	scaffold_10	1092907	1101460	0.155987	1100125	1107125	C40	deletion
DAPPUDRAFT_98859	scaffold_10	1217536	1218916	0.245105	1214125	1217875	C40	deletion
DAPPUDRAFT_98859	scaffold_10	1217536	1218916	1	1214125	1222875	C376	duplication
DAPPUDRAFT_300408	scaffold_10	1243381	1244140	1	1242125	1248875	C40	deletion
DAPPUDRAFT_237880	scaffold_10	1270679	1271600	0.755435	1266875	1271375	C376	deletion
DAPPUDRAFT_237880	scaffold_10	1270679	1271600	0.755435	1267000	1271375	C40	duplication
DAPPUDRAFT_237886	scaffold_10	1305265	1306621	1	1301750	1306625	C376	duplication
DAPPUDRAFT_237886	scaffold_10	1305265	1306621	1	1302500	1307000	C40	deletion
DAPPUDRAFT_314121	scaffold_10	1362521	1365173	1	1362250	1370750	C352	deletion
DAPPUDRAFT_300291	scaffold_10	1365856	1366360	1	1362250	1370750	C352	deletion
DAPPUDRAFT_237910	scaffold_10	1368400	1368818	1	1362250	1370750	C352	deletion
DAPPUDRAFT_300421	scaffold_10	1369533	1371708	0.559338	1362250	1370750	C352	deletion
DAPPUDRAFT_237916	scaffold_10	1386327	1389406	0.659519	1387375	1390500	C374	deletion
DAPPUDRAFT_222611	scaffold_10	1509233	1512267	1	1506500	1529125	C254	deletion
DAPPUDRAFT_193882	scaffold_10	1515755	1517796	1	1506500	1529125	C254	deletion
DAPPUDRAFT_314208	scaffold_10	1742620	1743152	1	1738250	1746500	C374	deletion
DAPPUDRAFT_300309	scaffold_10	1743315	1745620	1	1738250	1746500	C374	deletion
DAPPUDRAFT_314210	scaffold_10	1745919	1749898	0.145802	1738250	1746500	C374	deletion
DAPPUDRAFT_314210	scaffold_10	1745919	1749898	0.66541	1747250	1753125	C374	deletion
DAPPUDRAFT_314211	scaffold_10	1750338	1751352	1	1747250	1753125	C374	deletion
DAPPUDRAFT_314212	scaffold_10	1751378	1752812	1	1747250	1753125	C374	deletion
DAPPUDRAFT_300320	scaffold_10	1823149	1823588	1	1822750	1824625	C187	deletion
DAPPUDRAFT_314245	scaffold_10	1898183	1898766	0.455326	1898500	1904750	C40	deletion
DAPPUDRAFT_314252	scaffold_10	1905944	1906755	1	1899375	1907625	C376	duplication
DAPPUDRAFT_300326	scaffold_10	1982055	1984043	0.0976346	1979500	1982250	C376	deletion
DAPPUDRAFT_300344	scaffold_10	222591	228488	0.635855	223125	226875	C281	deletion
DAPPUDRAFT_313818	scaffold_10	322214	324169	0.214432	323749	325875	C02	deletion
DAPPUDRAFT_300359	scaffold_10	426487	429185	1	425000	431875	C376	duplication
DAPPUDRAFT_300229	scaffold_10	430226	431218	1	425000	431875	C376	duplication
DAPPUDRAFT_300359	scaffold_10	426487	429185	1	425000	432000	C40	deletion
DAPPUDRAFT_300229	scaffold_10	430226	431218	1	425000	432000	C40	deletion
DAPPUDRAFT_313905	scaffold_10	601065	601650	1	599625	602875	C40	duplication
DAPPUDRAFT_313905	scaffold_10	601065	601650	0.683219	601250	602875	C376	deletion
DAPPUDRAFT_313947	scaffold_10	775777	776036	1	770500	776500	C376	duplication
DAPPUDRAFT_313947	scaffold_10	775777	776036	1	771375	776875	C40	deletion
DAPPUDRAFT_237770	scaffold_10	857100	859315	1	856375	862500	C40	deletion
DAPPUDRAFT_237770	scaffold_10	857100	859315	1	856625	863875	C376	duplication
DAPPUDRAFT_300260	scaffold_10	884787	885728	0.241489	885500	890750	C376	deletion
DAPPUDRAFT_237799	scaffold_10	974993	978054	1	974625	978875	C40	deletion
DAPPUDRAFT_300549	scaffold_101	99370	100952	0.206831	100624	101625	C02	deletion
DAPPUDRAFT_61481	scaffold_101	101384	101744	0.668524	100624	101625	C02	deletion
DAPPUDRAFT_328437	scaffold_103	6629	8923	0.402093	8000	18125	C364	duplication
DAPPUDRAFT_300595	scaffold_104	227030	228333	0.158986	228125	230875	C372	deletion
DAPPUDRAFT_113071	scaffold_104	229043	230618	1	228125	230875	C372	deletion
DAPPUDRAFT_300602	scaffold_104	374756	377811	1	374500	387750	C44	duplication
DAPPUDRAFT_257703	scaffold_104	378997	385502	1	374500	387750	C44	duplication
DAPPUDRAFT_258005	scaffold_108	170567	171223	1	168375	171750	C376	deletion
DAPPUDRAFT_230573	scaffold_11	1049482	1050379	1	1047125	1050500	C372	deletion
DAPPUDRAFT_314411	scaffold_11	1050168	1051378	0.27378	1047125	1050500	C372	deletion
DAPPUDRAFT_222844	scaffold_11	1808541	1810560	0.277007	1810000	1815375	C380	duplication
DAPPUDRAFT_328915	scaffold_111	248551	249295	0.900404	248625	251250	C40	deletion
DAPPUDRAFT_300985	scaffold_116	285021	286116	0.447898	285625	288000	C376	deletion
DAPPUDRAFT_329245	scaffold_116	286869	287310	1	285625	288000	C376	deletion
DAPPUDRAFT_329246	scaffold_116	287377	287822	1	285625	288000	C376	deletion
DAPPUDRAFT_258778	scaffold_116	291561	291866	1	291000	293125	C40	deletion
DAPPUDRAFT_113786	scaffold_116	358936	359612	1	358875	361125	C40	deletion
DAPPUDRAFT_300990	scaffold_116	90955	92752	0.859688	83500	92500	C40	deletion
DAPPUDRAFT_300990	scaffold_116	90955	92752	0.790089	83625	92375	C376	duplication
DAPPUDRAFT_300990	scaffold_116	90955	92752	1	90250	101500	C155	deletion
DAPPUDRAFT_329206	scaffold_116	92967	93614	1	90250	101500	C155	deletion
DAPPUDRAFT_300990	scaffold_116	90955	92752	0.209354	92375	98875	C376	duplication
DAPPUDRAFT_329206	scaffold_116	92967	93614	1	92375	98875	C376	duplication
DAPPUDRAFT_329206	scaffold_116	92967	93614	1	92750	99000	C40	deletion
DAPPUDRAFT_301032	scaffold_119	6617	7612	0.740443	6875	9500	C02	deletion
DAPPUDRAFT_301127	scaffold_12	1087496	1088385	0.425676	1082874	1087875	C02	deletion
DAPPUDRAFT_194468	scaffold_12	1445560	1446747	0.629005	1446000	1449750	C02	deletion
DAPPUDRAFT_222994	scaffold_12	1491175	1493528	0.914966	1491375	1494375	C251	duplication
DAPPUDRAFT_238849	scaffold_12	1498006	1499208	1	1494500	1500375	C251	duplication
DAPPUDRAFT_238880	scaffold_12	1595773	1596092	1	1594375	1600375	C380	duplication
DAPPUDRAFT_238882	scaffold_12	1599980	1603358	0.116672	1594375	1600375	C380	duplication
DAPPUDRAFT_314879	scaffold_12	1823656	1824909	1	1821750	1825000	C380	duplication
DAPPUDRAFT_314900	scaffold_12	1915455	1915621	1	1913125	1919750	C02	duplication
DAPPUDRAFT_99402	scaffold_12	50366	52227	1	46500	60000	C364	duplication
DAPPUDRAFT_238645	scaffold_12	483232	483804	1	483000	495375	C299	deletion
DAPPUDRAFT_314670	scaffold_12	567370	568974	1	567000	570875	C299	deletion
DAPPUDRAFT_194355	scaffold_12	570710	572807	0.0782443	567000	570875	C299	deletion
DAPPUDRAFT_194355	scaffold_12	570710	572807	0.324905	572125	575875	C170	deletion
DAPPUDRAFT_99493	scaffold_12	572998	574173	1	572125	575875	C170	deletion
DAPPUDRAFT_222870	scaffold_12	66860	70591	1	60250	74500	C364	duplication
DAPPUDRAFT_99409	scaffold_12	71139	73435	1	60250	74500	C364	duplication
DAPPUDRAFT_238563	scaffold_12	73642	74221	1	60250	74500	C364	duplication
DAPPUDRAFT_329447	scaffold_120	313021	313391	1	313000	316125	C02	deletion
DAPPUDRAFT_301139	scaffold_120	313932	315349	1	313000	316125	C02	deletion
DAPPUDRAFT_314990	scaffold_13	344332	345258	0.142703	345125	346375	C187	deletion
DAPPUDRAFT_194582	scaffold_13	499001	500286	0.290498	497875	499375	C378	deletion
DAPPUDRAFT_209727	scaffold_13	712020	713027	0.274354	712750	714500	C281	deletion
DAPPUDRAFT_32440	scaffold_13	777142	780157	1	776625	780375	CC9	deletion
DAPPUDRAFT_329943	scaffold_130	78920	79259	1	75875	81750	C40	deletion
DAPPUDRAFT_114421	scaffold_130	103443	104484	1	96625	106875	C40	deletion
DAPPUDRAFT_114421	scaffold_130	103443	104484	1	96625	107000	C376	duplication
DAPPUDRAFT_330014	scaffold_132	16997	17304	1	14625	18125	C364	duplication
DAPPUDRAFT_18536	scaffold_1322	4114	4346	1	2125	5125	C376	deletion
DAPPUDRAFT_120300	scaffold_1322	52	1144	0.36022	750	2250	C376	duplication
DAPPUDRAFT_63112	scaffold_133	208001	208277	1	208000	216000	C291	duplication
DAPPUDRAFT_260184	scaffold_134	188953	190843	1	188750	193375	C251	deletion
DAPPUDRAFT_301464	scaffold_134	191998	193344	1	188750	193375	C251	deletion
DAPPUDRAFT_260184	scaffold_134	188953	190843	1	188875	192375	C280	deletion
DAPPUDRAFT_301464	scaffold_134	191998	193344	0.279554	188875	192375	C280	deletion
DAPPUDRAFT_260141	scaffold_134	17007	17482	1	8875	19625	C364	deletion
DAPPUDRAFT_330331	scaffold_138	295929	296543	0.725938	293875	296375	C355	deletion
DAPPUDRAFT_114831	scaffold_139	247355	249574	0.201984	249125	251625	C21	deletion
DAPPUDRAFT_239498	scaffold_14	173021	173857	0.426347	173500	175375	C380	duplication
DAPPUDRAFT_239499	scaffold_14	175283	175458	0.522989	173500	175375	C380	duplication
DAPPUDRAFT_100157	scaffold_14	298140	298702	1	297625	304250	C16	duplication
DAPPUDRAFT_315376	scaffold_14	301055	301405	1	297625	304250	C16	duplication
DAPPUDRAFT_239654	scaffold_14	810971	811732	0.201316	808250	811125	C44	deletion
DAPPUDRAFT_100245	scaffold_14	996893	998417	1	995875	1002125	C44	duplication
DAPPUDRAFT_114887	scaffold_141	52582	55706	1	50625	59500	C155	duplication
DAPPUDRAFT_229022	scaffold_141	56673	59345	1	50625	59500	C155	duplication
DAPPUDRAFT_301724	scaffold_142	233394	236024	0.230126	232500	234000	C378	deletion
DAPPUDRAFT_260814	scaffold_143	177996	178354	0.288515	178250	184125	C151	deletion
DAPPUDRAFT_260873	scaffold_144	107406	107919	1	104125	109125	C280	deletion
DAPPUDRAFT_301800	scaffold_147	71857	73412	1	69750	73750	C372	deletion
DAPPUDRAFT_47975	scaffold_15	1010881	1012902	0.941089	1011000	1013000	C355	deletion
DAPPUDRAFT_315765	scaffold_15	667821	668064	1	667625	670000	C372	deletion
DAPPUDRAFT_48121	scaffold_15	668204	669544	1	667625	670000	C372	deletion
DAPPUDRAFT_301866	scaffold_15	844170	845903	0.882217	844374	846500	C02	deletion
DAPPUDRAFT_330880	scaffold_151	155068	155918	1	149375	157625	C374	duplication
DAPPUDRAFT_330880	scaffold_151	155068	155918	1	150500	157750	C25	duplication
DAPPUDRAFT_218645	scaffold_152	96767	98605	1	96375	99250	C372	deletion
DAPPUDRAFT_63869	scaffold_154	59086	59255	1	58500	63625	C178	deletion
DAPPUDRAFT_261722	scaffold_157	120902	123131	0.716786	116000	122500	C291	duplication
DAPPUDRAFT_261722	scaffold_157	120902	123131	0.0583483	123000	125875	C380	deletion
DAPPUDRAFT_261723	scaffold_157	123186	127195	0.670659	123000	125875	C380	deletion
DAPPUDRAFT_331099	scaffold_157	31737	32652	1	31375	36125	C380	duplication
DAPPUDRAFT_331101	scaffold_157	33140	33455	1	31375	36125	C380	duplication
DAPPUDRAFT_261702	scaffold_157	46756	47270	1	41750	60125	C380	duplication
DAPPUDRAFT_331107	scaffold_157	53333	53646	1	41750	60125	C380	duplication
DAPPUDRAFT_302021	scaffold_157	55011	57307	1	41750	60125	C380	duplication
DAPPUDRAFT_331109	scaffold_157	57846	58589	1	41750	60125	C380	duplication
DAPPUDRAFT_316130	scaffold_16	1140769	1141660	0.459551	1141250	1142250	C372	deletion
DAPPUDRAFT_261922	scaffold_160	208684	210174	1	200250	210875	C372	deletion
DAPPUDRAFT_229214	scaffold_160	46838	48414	1	46375	48625	C372	deletion
DAPPUDRAFT_331228	scaffold_160	74502	77721	1	70500	85625	C372	deletion
DAPPUDRAFT_261889	scaffold_160	98221	99590	1	96750	100250	C380	duplication
DAPPUDRAFT_262244	scaffold_166	103045	103465	1	101625	104750	C376	duplication
DAPPUDRAFT_262244	scaffold_166	103045	103465	1	102000	104750	C40	deletion
DAPPUDRAFT_331486	scaffold_166	87296	89675	0.283431	89000	92375	C376	deletion
DAPPUDRAFT_262414	scaffold_169	107468	108024	1	104875	108250	C376	duplication
DAPPUDRAFT_262414	scaffold_169	107468	108024	1	105750	109500	C40	deletion
DAPPUDRAFT_316553	scaffold_17	1386006	1386820	1	1384625	1393750	C391	deletion
DAPPUDRAFT_240853	scaffold_17	696419	697130	0.885915	696500	701625	C178	deletion
DAPPUDRAFT_316387	scaffold_17	697156	697589	1	696500	701625	C178	deletion
DAPPUDRAFT_101223	scaffold_17	701265	707522	0.0573849	696500	701625	C178	deletion
DAPPUDRAFT_218866	scaffold_170	167922	170210	0.310013	169500	175250	C178	duplication
DAPPUDRAFT_331774	scaffold_173	169684	170062	1	167625	171500	C380	duplication
DAPPUDRAFT_331774	scaffold_173	169684	170062	1	168875	176000	C02	deletion
DAPPUDRAFT_116101	scaffold_174	120429	122007	1	120250	122750	C02	deletion
DAPPUDRAFT_116136	scaffold_175	146703	149283	0.25475	148625	153000	C380	duplication
DAPPUDRAFT_262912	scaffold_177	280827	282394	0.4106	281750	285125	C376	deletion
DAPPUDRAFT_116175	scaffold_177	49890	50743	0.577465	50250	55500	C40	deletion
DAPPUDRAFT_241428	scaffold_18	1039570	1040642	1	1031750	1041375	C280	deletion
DAPPUDRAFT_241440	scaffold_18	1087892	1088645	1	1084250	1098500	C280	deletion
DAPPUDRAFT_101723	scaffold_18	1160965	1163324	0.13698	1163000	1169125	C280	deletion
DAPPUDRAFT_316920	scaffold_18	1184868	1185741	1	1183000	1188500	C280	deletion
DAPPUDRAFT_210764	scaffold_18	1229575	1230758	0.993232	1226500	1230750	C280	deletion
DAPPUDRAFT_302576	scaffold_18	1274431	1275681	1	1270875	1278125	C280	deletion
DAPPUDRAFT_241519	scaffold_18	1275658	1278954	0.748407	1270875	1278125	C280	deletion
DAPPUDRAFT_302577	scaffold_18	1279154	1280648	0.684528	1279625	1288750	C280	deletion
DAPPUDRAFT_316993	scaffold_18	1388068	1395949	0.627919	1391000	1396250	C280	deletion
DAPPUDRAFT_316801	scaffold_18	841449	841783	1	835125	842500	C18	deletion
DAPPUDRAFT_116316	scaffold_180	178737	179408	1	178250	187625	C21	duplication
DAPPUDRAFT_116316	scaffold_180	178737	179408	1	178250	187625	C380	deletion
DAPPUDRAFT_223934	scaffold_19	453581	456028	1	451625	458500	C300	duplication
DAPPUDRAFT_116680	scaffold_193	123639	124060	1	115250	125625	C40	duplication
DAPPUDRAFT_116680	scaffold_193	123639	124060	1	116500	126125	C155	duplication
DAPPUDRAFT_116680	scaffold_193	123639	124060	1	118250	125750	C376	deletion
DAPPUDRAFT_332498	scaffold_193	131746	133366	0.457072	132625	134625	C376	deletion
DAPPUDRAFT_332499	scaffold_193	134603	134852	0.0846774	132625	134625	C376	deletion
DAPPUDRAFT_303202	scaffold_2	2587396	2592950	0.846209	2588250	2594375	C178	deletion
DAPPUDRAFT_233279	scaffold_2	2593104	2594738	0.77771	2588250	2594375	C178	deletion
DAPPUDRAFT_190908	scaffold_2	3532401	3536551	0.976139	3532500	3537625	C380	duplication
DAPPUDRAFT_303073	scaffold_2	3546131	3547219	0.568537	3545500	3546750	C02	deletion
DAPPUDRAFT_303119	scaffold_2	615691	618672	0.309396	617749	619875	C02	deletion
DAPPUDRAFT_232930	scaffold_2	619702	623053	0.0513433	617749	619875	C02	deletion
DAPPUDRAFT_211177	scaffold_20	1039688	1041557	1	1039125	1045250	C300	deletion
DAPPUDRAFT_317204	scaffold_20	119944	120424	1	118000	125250	C280	deletion
DAPPUDRAFT_49825	scaffold_20	216003	216913	1	213750	218000	C187	deletion
DAPPUDRAFT_102073	scaffold_20	217942	219238	0.376062	218750	220750	C187	deletion
DAPPUDRAFT_317228	scaffold_20	219558	220315	1	218750	220750	C187	deletion
DAPPUDRAFT_102075	scaffold_20	227632	228396	1	220750	253875	C187	deletion
DAPPUDRAFT_241886	scaffold_20	228440	230003	1	220750	253875	C187	deletion
DAPPUDRAFT_241887	scaffold_20	233590	241331	1	220750	253875	C187	deletion
DAPPUDRAFT_317233	scaffold_20	324054	325864	1	320625	327875	C187	deletion
DAPPUDRAFT_49847	scaffold_20	326772	330145	0.326809	320625	327875	C187	deletion
DAPPUDRAFT_49847	scaffold_20	326772	330145	0.672894	327875	332875	C187	deletion
DAPPUDRAFT_241894	scaffold_20	331343	332103	1	327875	332875	C187	deletion
DAPPUDRAFT_102081	scaffold_20	345125	345761	1	338375	352000	C187	deletion
DAPPUDRAFT_102083	scaffold_20	351421	351897	1	338375	352000	C187	deletion
DAPPUDRAFT_102084	scaffold_20	352628	353977	1	352000	366000	C187	deletion
DAPPUDRAFT_224074	scaffold_20	355979	358041	1	352000	366000	C187	deletion
DAPPUDRAFT_224075	scaffold_20	361011	364302	1	352000	366000	C187	deletion
DAPPUDRAFT_317245	scaffold_20	377573	378399	0.330909	378125	380375	C187	deletion
DAPPUDRAFT_241910	scaffold_20	378573	380689	0.851537	378125	380375	C187	deletion
DAPPUDRAFT_241910	scaffold_20	378573	380689	0.147991	380375	389625	C187	deletion
DAPPUDRAFT_102092	scaffold_20	381261	382573	1	380375	389625	C187	deletion
DAPPUDRAFT_102093	scaffold_20	385489	388504	1	380375	389625	C187	deletion
DAPPUDRAFT_241913	scaffold_20	392168	392946	1	389625	397000	C187	deletion
DAPPUDRAFT_241915	scaffold_20	394580	396642	1	389625	397000	C187	deletion
DAPPUDRAFT_241916	scaffold_20	397187	398201	1	397000	412000	C187	deletion
DAPPUDRAFT_224078	scaffold_20	403571	404733	1	397000	412000	C187	deletion
DAPPUDRAFT_224080	scaffold_20	408232	410656	1	397000	412000	C187	deletion
DAPPUDRAFT_241922	scaffold_20	411327	412831	0.447106	397000	412000	C187	deletion
DAPPUDRAFT_241922	scaffold_20	411327	412831	0.552229	412000	414000	C187	deletion
DAPPUDRAFT_241923	scaffold_20	413686	413951	1	412000	414000	C187	deletion
DAPPUDRAFT_241925	scaffold_20	418632	422567	0.207422	421750	430500	C187	deletion
DAPPUDRAFT_241929	scaffold_20	428905	429308	1	421750	430500	C187	deletion
DAPPUDRAFT_241931	scaffold_20	435913	436493	1	435750	437125	C187	deletion
DAPPUDRAFT_241932	scaffold_20	437987	444867	0.672191	438250	442875	C187	deletion
DAPPUDRAFT_241933	scaffold_20	445739	449768	1	445125	450500	C187	deletion
DAPPUDRAFT_241935	scaffold_20	450214	451768	0.183516	445125	450500	C187	deletion
DAPPUDRAFT_241936	scaffold_20	451952	471310	0.316371	452375	458500	C187	deletion
DAPPUDRAFT_241936	scaffold_20	451952	471310	0.219507	458875	463125	C187	deletion
DAPPUDRAFT_241936	scaffold_20	451952	471310	0.225965	463875	468250	C187	deletion
DAPPUDRAFT_241936	scaffold_20	451952	471310	0.158031	468250	474250	C187	deletion
DAPPUDRAFT_241938	scaffold_20	485593	485909	1	481125	488875	C187	deletion
DAPPUDRAFT_241939	scaffold_20	487643	487935	1	481125	488875	C187	deletion
DAPPUDRAFT_241940	scaffold_20	488065	488593	1	481125	488875	C187	deletion
DAPPUDRAFT_188037	scaffold_20	546220	547701	1	543750	557000	C187	deletion
DAPPUDRAFT_49875	scaffold_20	552587	553930	1	543750	557000	C187	deletion
DAPPUDRAFT_317274	scaffold_20	562740	563545	1	562625	567500	C187	deletion
DAPPUDRAFT_317276	scaffold_20	580880	584431	1	567500	585250	C187	deletion
DAPPUDRAFT_102133	scaffold_20	599504	600944	1	598875	621000	C364	duplication
DAPPUDRAFT_211088	scaffold_20	601003	603785	1	598875	621000	C364	duplication
DAPPUDRAFT_317282	scaffold_20	604831	609755	1	598875	621000	C364	duplication
DAPPUDRAFT_317283	scaffold_20	609838	610043	1	598875	621000	C364	duplication
DAPPUDRAFT_241969	scaffold_20	623050	625292	1	621750	648625	C364	duplication
DAPPUDRAFT_241971	scaffold_20	627831	631524	1	621750	648625	C364	duplication
DAPPUDRAFT_241972	scaffold_20	631646	637551	1	621750	648625	C364	duplication
DAPPUDRAFT_211094	scaffold_20	641158	641930	1	621750	648625	C364	duplication
DAPPUDRAFT_196010	scaffold_20	642083	643269	1	621750	648625	C364	duplication
DAPPUDRAFT_303338	scaffold_20	645796	646711	1	621750	648625	C364	duplication
DAPPUDRAFT_49874	scaffold_20	646960	648169	1	621750	648625	C364	duplication
DAPPUDRAFT_338052	scaffold_2003	2217	2533	1	1625	2750	C178	deletion
DAPPUDRAFT_263995	scaffold_203	18309	18755	1	12875	30625	C281	deletion
DAPPUDRAFT_263995	scaffold_203	18309	18755	1	7875	27625	C170	deletion
DAPPUDRAFT_263995	scaffold_203	18309	18755	1	7875	30750	C151	deletion
DAPPUDRAFT_211258	scaffold_21	256781	258261	0.682894	257250	260125	C372	deletion
DAPPUDRAFT_303402	scaffold_21	258519	259105	1	257250	260125	C372	deletion
DAPPUDRAFT_303452	scaffold_21	259161	260025	1	257250	260125	C372	deletion
DAPPUDRAFT_117181	scaffold_219	115400	116848	0.75812	115750	121125	C171	deletion
DAPPUDRAFT_264538	scaffold_219	120325	122392	0.386738	115750	121125	C171	deletion
DAPPUDRAFT_117181	scaffold_219	115400	116848	0.75812	115750	121250	C181	deletion
DAPPUDRAFT_264538	scaffold_219	120325	122392	0.447241	115750	121250	C181	deletion
DAPPUDRAFT_317981	scaffold_23	157063	159614	0.828627	157500	161375	C352	deletion
DAPPUDRAFT_242854	scaffold_23	161899	163844	1	161500	250750	C352	deletion
DAPPUDRAFT_303715	scaffold_23	195258	197119	1	161500	250750	C352	deletion
DAPPUDRAFT_317988	scaffold_23	197927	206608	1	161500	250750	C352	deletion
DAPPUDRAFT_303717	scaffold_23	212165	212808	1	161500	250750	C352	deletion
DAPPUDRAFT_102792	scaffold_23	222663	227794	1	161500	250750	C352	deletion
DAPPUDRAFT_102793	scaffold_23	232307	237969	1	161500	250750	C352	deletion
DAPPUDRAFT_242878	scaffold_23	251734	253660	1	250875	257875	C352	deletion
DAPPUDRAFT_317996	scaffold_23	257335	258258	0.584599	250875	257875	C352	deletion
DAPPUDRAFT_242883	scaffold_23	274044	274680	1	269625	323625	C352	duplication
DAPPUDRAFT_242884	scaffold_23	274789	274977	1	269625	323625	C352	duplication
DAPPUDRAFT_318003	scaffold_23	276835	277482	1	269625	323625	C352	duplication
DAPPUDRAFT_303656	scaffold_23	278197	279069	1	269625	323625	C352	duplication
DAPPUDRAFT_303657	scaffold_23	279528	280254	1	269625	323625	C352	duplication
DAPPUDRAFT_303721	scaffold_23	280792	281687	1	269625	323625	C352	duplication
DAPPUDRAFT_318006	scaffold_23	282098	282702	1	269625	323625	C352	duplication
DAPPUDRAFT_224357	scaffold_23	283556	284324	1	269625	323625	C352	duplication
DAPPUDRAFT_303722	scaffold_23	286927	290365	1	269625	323625	C352	duplication
DAPPUDRAFT_224358	scaffold_23	290878	291841	1	269625	323625	C352	duplication
DAPPUDRAFT_102767	scaffold_23	36966	42732	1	35875	43875	C352	deletion
DAPPUDRAFT_242836	scaffold_23	69626	70104	1	69375	90750	C352	deletion
DAPPUDRAFT_317974	scaffold_23	90660	91069	0.218137	69375	90750	C352	deletion
DAPPUDRAFT_242849	scaffold_23	115451	115620	1	92250	122875	C352	deletion
DAPPUDRAFT_318415	scaffold_24	1274733	1278007	0.572563	1275000	1276875	C187	deletion
DAPPUDRAFT_318217	scaffold_24	247248	248765	1	245000	254750	C155	deletion
DAPPUDRAFT_243330	scaffold_24	930430	930794	1	930250	936625	C155	deletion
DAPPUDRAFT_318342	scaffold_24	955584	955795	0.785714	953250	955750	C376	duplication
DAPPUDRAFT_318342	scaffold_24	955584	955795	0.785714	953375	955750	C40	deletion
DAPPUDRAFT_117621	scaffold_247	30429	31643	0.160758	24875	30625	C376	duplication
DAPPUDRAFT_224682	scaffold_25	616797	617579	1	608750	623000	C364	duplication
DAPPUDRAFT_211957	scaffold_25	664185	667898	1	662375	669000	C364	duplication
DAPPUDRAFT_304029	scaffold_25	817136	818586	0.250518	815875	817500	C02	deletion
DAPPUDRAFT_265416	scaffold_250	87060	88214	0.184735	88000	97000	C378	duplication
DAPPUDRAFT_117667	scaffold_250	102645	103597	0.109359	97750	102750	C02	duplication
DAPPUDRAFT_265629	scaffold_261	113723	114277	1	112750	120875	C372	deletion
DAPPUDRAFT_265629	scaffold_261	113723	114277	1	112875	120125	C44	duplication
DAPPUDRAFT_304240	scaffold_27	33991	35130	1	31000	36250	C372	deletion
DAPPUDRAFT_197118	scaffold_27	35279	37395	0.458629	31000	36250	C372	deletion
DAPPUDRAFT_319046	scaffold_27	881509	882602	0.792125	872750	882375	C291	duplication
DAPPUDRAFT_103849	scaffold_27	888298	889766	1	887625	890000	C372	deletion
DAPPUDRAFT_319270	scaffold_28	1021269	1022386	1	1018625	1031625	C352	deletion
DAPPUDRAFT_304382	scaffold_28	1087344	1094474	0.557301	1090500	1095500	C352	deletion
DAPPUDRAFT_333945	scaffold_282	27996	28359	1	26750	31375	C374	duplication
DAPPUDRAFT_333945	scaffold_282	27996	28359	1	26750	31375	C378	deletion
DAPPUDRAFT_265974	scaffold_283	57464	57651	0.806452	57500	69375	C155	duplication
DAPPUDRAFT_304400	scaffold_283	67266	68391	1	57500	69375	C155	duplication
DAPPUDRAFT_204585	scaffold_283	68953	73620	0.0902272	57500	69375	C155	duplication
DAPPUDRAFT_304400	scaffold_283	67266	68391	0.652135	65375	68000	C376	deletion
DAPPUDRAFT_304407	scaffold_285	51650	54499	1	51125	61875	C151	duplication
DAPPUDRAFT_266011	scaffold_285	58243	58605	1	51125	61875	C151	duplication
DAPPUDRAFT_304406	scaffold_285	77912	79531	0.559333	78625	81625	C281	deletion
DAPPUDRAFT_104153	scaffold_29	198686	201662	1	192500	202250	C376	duplication
DAPPUDRAFT_104153	scaffold_29	198686	201662	0.987563	193000	201625	C40	deletion
DAPPUDRAFT_244635	scaffold_29	202066	239656	0.0764585	202875	205750	C40	deletion
DAPPUDRAFT_244635	scaffold_29	202066	239656	0.119689	213625	218125	C40	deletion
DAPPUDRAFT_311177	scaffold_3	3514858	3518185	0.0799759	3510125	3515125	C251	duplication
DAPPUDRAFT_311177	scaffold_3	3514858	3518185	0.882141	3515250	3518875	C251	duplication
DAPPUDRAFT_304793	scaffold_3	3518452	3522169	0.113563	3515250	3518875	C251	duplication
DAPPUDRAFT_233546	scaffold_3	68932	69928	1	67750	71625	C380	duplication
DAPPUDRAFT_310665	scaffold_3	70700	70906	1	67750	71625	C380	duplication
DAPPUDRAFT_245061	scaffold_30	1049503	1050543	1	1048375	1054250	C40	duplication
DAPPUDRAFT_266294	scaffold_305	25029	25333	1	22875	26875	C376	deletion
DAPPUDRAFT_118125	scaffold_305	26497	27990	0.252681	22875	26875	C376	deletion
DAPPUDRAFT_118125	scaffold_305	26497	27990	0.746649	26875	29750	C40	deletion
DAPPUDRAFT_118125	scaffold_305	26497	27990	0.411528	27375	30000	C376	duplication
DAPPUDRAFT_334140	scaffold_305	92201	92941	1	88625	98375	C376	duplication
DAPPUDRAFT_304936	scaffold_31	306989	308653	0.38184	305999	307625	C02	deletion
DAPPUDRAFT_320008	scaffold_33	153280	156427	0.612206	154500	157875	C372	deletion
DAPPUDRAFT_305105	scaffold_33	714707	715423	1	710750	719250	CC4	duplication
DAPPUDRAFT_334327	scaffold_331	34542	35023	1	33625	36875	C380	deletion
DAPPUDRAFT_334366	scaffold_334	46960	47237	1	42750	53500	C24	duplication
DAPPUDRAFT_334367	scaffold_334	47740	48276	1	42750	53500	C24	duplication
DAPPUDRAFT_246039	scaffold_34	968405	974070	0.806674	969500	974500	C40	deletion
DAPPUDRAFT_246039	scaffold_34	968405	974070	0.784605	969625	974500	C376	duplication
DAPPUDRAFT_246039	scaffold_34	968405	974070	0.321151	972250	979125	C178	deletion
DAPPUDRAFT_246386	scaffold_36	186803	187405	1	180000	187875	C34	duplication
DAPPUDRAFT_105551	scaffold_37	151593	155026	1	148500	158000	C380	duplication
DAPPUDRAFT_320798	scaffold_37	271687	273118	0.130769	263750	271875	C380	duplication
DAPPUDRAFT_305283	scaffold_37	400567	401366	1	397125	405500	C380	deletion
DAPPUDRAFT_246859	scaffold_37	750455	750685	1	744750	758500	C380	deletion
DAPPUDRAFT_246668	scaffold_37	87753	89064	0.81145	88000	96625	C380	deletion
DAPPUDRAFT_246671	scaffold_37	92330	93387	1	88000	96625	C380	deletion
DAPPUDRAFT_105696	scaffold_38	197150	198637	0.318977	193500	197625	C380	duplication
DAPPUDRAFT_105696	scaffold_38	197150	198637	0.512113	197875	202000	C380	duplication
DAPPUDRAFT_246975	scaffold_38	217994	218166	1	213000	224125	C380	duplication
DAPPUDRAFT_231106	scaffold_38	279870	281239	1	276750	281875	C380	duplication
DAPPUDRAFT_247022	scaffold_38	413835	414762	0.447084	403750	414250	C380	duplication
DAPPUDRAFT_105756	scaffold_38	644501	646167	0.925526	644625	651375	C380	duplication
DAPPUDRAFT_247084	scaffold_38	648744	649029	1	644625	651375	C380	duplication
DAPPUDRAFT_321033	scaffold_38	650915	652823	0.240692	644625	651375	C380	duplication
DAPPUDRAFT_305639	scaffold_4	1354802	1357684	0.589032	1351875	1356500	C372	deletion
DAPPUDRAFT_234592	scaffold_4	1356065	1358211	0.202331	1351875	1356500	C372	deletion
DAPPUDRAFT_305432	scaffold_4	348621	349412	1	347000	350875	C372	deletion
DAPPUDRAFT_95942	scaffold_4	349939	351041	0.849228	347000	350875	C372	deletion
DAPPUDRAFT_305804	scaffold_40	731228	732648	1	712875	743125	C380	duplication
DAPPUDRAFT_247581	scaffold_40	744139	746185	1	743125	755125	C380	duplication
DAPPUDRAFT_247582	scaffold_40	747117	748580	1	743125	755125	C380	duplication
DAPPUDRAFT_305805	scaffold_40	749256	750282	1	743125	755125	C380	duplication
DAPPUDRAFT_305773	scaffold_40	750288	752449	1	743125	755125	C380	duplication
DAPPUDRAFT_247585	scaffold_40	753541	754526	1	743125	755125	C380	duplication
DAPPUDRAFT_247620	scaffold_40	843899	845431	1	842625	852750	C380	duplication
DAPPUDRAFT_106131	scaffold_40	883875	884460	0.854452	879000	884375	C380	duplication
DAPPUDRAFT_305830	scaffold_41	467037	469132	0.659503	467750	471125	C372	deletion
DAPPUDRAFT_305831	scaffold_41	470712	471081	1	467750	471125	C372	deletion
DAPPUDRAFT_305894	scaffold_42	94575	97537	0.590679	94875	96625	C151	deletion
DAPPUDRAFT_305990	scaffold_43	1036555	1037657	0.709355	1036875	1043625	C151	deletion
DAPPUDRAFT_106625	scaffold_43	1037998	1038715	1	1036875	1043625	C151	deletion
DAPPUDRAFT_305992	scaffold_43	1038816	1040664	1	1036875	1043625	C151	deletion
DAPPUDRAFT_305960	scaffold_43	267785	268192	1	259000	270125	C151	deletion
DAPPUDRAFT_248248	scaffold_43	352102	367609	0.573778	347250	361000	C151	deletion
DAPPUDRAFT_248310	scaffold_43	700031	705458	0.984703	699000	705375	C151	duplication
DAPPUDRAFT_54701	scaffold_43	707999	725160	1	705375	728500	C151	duplication
DAPPUDRAFT_225899	scaffold_43	739715	741667	1	728500	756500	C151	duplication
DAPPUDRAFT_198715	scaffold_43	741722	742556	1	728500	756500	C151	duplication
DAPPUDRAFT_306028	scaffold_43	752765	753834	1	728500	756500	C151	duplication
DAPPUDRAFT_306029	scaffold_43	755504	759608	0.242505	728500	756500	C151	duplication
DAPPUDRAFT_225907	scaffold_43	785444	787351	0.118048	787125	803500	C151	duplication
DAPPUDRAFT_248327	scaffold_43	787457	787778	1	787125	803500	C151	duplication
DAPPUDRAFT_321879	scaffold_43	788479	789042	1	787125	803500	C151	duplication
DAPPUDRAFT_213768	scaffold_43	791848	796003	1	787125	803500	C151	duplication
DAPPUDRAFT_106588	scaffold_43	840037	850494	0.788351	842250	851000	C151	deletion
DAPPUDRAFT_305983	scaffold_43	875812	876118	1	870750	885750	C151	deletion
DAPPUDRAFT_213631	scaffold_43	9150	10816	1	8875	19250	C151	duplication
DAPPUDRAFT_305993	scaffold_43	11171	13641	1	8875	19250	C151	duplication
DAPPUDRAFT_299669	scaffold_43	13768	15104	1	8875	19250	C151	duplication
DAPPUDRAFT_106606	scaffold_43	972015	972648	1	969125	976875	C151	deletion
DAPPUDRAFT_248374	scaffold_43	993586	995866	0.269855	995250	1007875	C151	deletion
DAPPUDRAFT_306045	scaffold_43	999710	1005295	1	995250	1007875	C151	deletion
DAPPUDRAFT_305989	scaffold_43	1005523	1007665	1	995250	1007875	C151	deletion
DAPPUDRAFT_248449	scaffold_44	297595	300135	0.594328	298625	306000	C364	duplication
DAPPUDRAFT_106666	scaffold_44	301465	303010	1	298625	306000	C364	duplication
DAPPUDRAFT_248586	scaffold_44	825220	830768	1	820875	832000	C44	duplication
DAPPUDRAFT_188546	scaffold_45	28589	30211	0.407156	27750	29250	C372	deletion
DAPPUDRAFT_106854	scaffold_45	585383	585821	1	584374	587750	C02	deletion
DAPPUDRAFT_248810	scaffold_45	698199	699106	0.253863	698875	700375	C187	deletion
DAPPUDRAFT_306215	scaffold_47	571816	573629	1	566875	575750	C352	duplication
DAPPUDRAFT_306244	scaffold_47	587230	593742	0.98203	577875	593625	C352	duplication
DAPPUDRAFT_306258	scaffold_47	760111	763020	1	756500	765750	C352	duplication
DAPPUDRAFT_249242	scaffold_47	869320	880875	0.21023	867625	871750	C380	duplication
DAPPUDRAFT_199058	scaffold_47	907813	909296	0.199055	909000	911875	C352	duplication
DAPPUDRAFT_249283	scaffold_48	133044	133909	1	131625	140125	C291	deletion
DAPPUDRAFT_322547	scaffold_48	134518	139966	1	131625	140125	C291	deletion
DAPPUDRAFT_249295	scaffold_48	181510	182280	0.525358	181875	184375	C291	deletion
DAPPUDRAFT_249313	scaffold_48	259332	260282	0.43941	255625	259750	C291	deletion
DAPPUDRAFT_249314	scaffold_48	262356	262606	0.421687	262500	265000	C291	deletion
DAPPUDRAFT_249315	scaffold_48	263443	263887	1	262500	265000	C291	deletion
DAPPUDRAFT_249318	scaffold_48	277722	278106	1	277000	279875	C291	deletion
DAPPUDRAFT_107237	scaffold_48	332972	334210	1	331000	336250	C291	deletion
DAPPUDRAFT_249331	scaffold_48	335257	335550	1	331000	336250	C291	deletion
DAPPUDRAFT_249266	scaffold_48	48154	50557	1	46500	54500	C291	deletion
DAPPUDRAFT_249269	scaffold_48	53762	54322	1	46500	54500	C291	deletion
DAPPUDRAFT_107279	scaffold_48	665607	667547	1	664375	673500	C291	duplication
DAPPUDRAFT_107280	scaffold_48	669160	670710	1	664375	673500	C291	duplication
DAPPUDRAFT_322534	scaffold_48	76763	77743	1	74375	96000	C291	deletion
DAPPUDRAFT_322536	scaffold_48	80797	81237	1	74375	96000	C291	deletion
DAPPUDRAFT_249430	scaffold_48	755037	756340	0.354839	752375	755500	C376	deletion
DAPPUDRAFT_249430	scaffold_48	755037	756340	1	752375	756750	C40	duplication
DAPPUDRAFT_249443	scaffold_48	798449	799380	1	796000	807625	C291	duplication
DAPPUDRAFT_107304	scaffold_48	803438	804333	1	796000	807625	C291	duplication
DAPPUDRAFT_306337	scaffold_49	464761	465938	0.584184	465250	468625	C372	deletion
DAPPUDRAFT_249597	scaffold_49	596294	616051	0.0505669	612750	613750	C187	deletion
DAPPUDRAFT_312000	scaffold_5	1107478	1109113	1	1107000	1113625	C20	deletion
DAPPUDRAFT_322887	scaffold_50	286712	287342	1	286125	292500	C291	deletion
DAPPUDRAFT_323067	scaffold_51	752311	754630	1	751750	758125	CC9	deletion
DAPPUDRAFT_306678	scaffold_51	754744	755644	1	751750	758125	CC9	deletion
DAPPUDRAFT_250064	scaffold_51	761782	762201	1	760000	764375	CC9	deletion
DAPPUDRAFT_306642	scaffold_51	827192	827984	1	821875	842250	CC9	deletion
DAPPUDRAFT_306682	scaffold_51	837347	840325	1	821875	842250	CC9	deletion
DAPPUDRAFT_323098	scaffold_51	840506	841232	1	821875	842250	CC9	deletion
DAPPUDRAFT_55751	scaffold_51	841453	842026	1	821875	842250	CC9	deletion
DAPPUDRAFT_306727	scaffold_52	509950	511677	0.318076	495875	510500	CC10	duplication
DAPPUDRAFT_323297	scaffold_53	268001	271944	0.0629122	264875	268250	C372	deletion
DAPPUDRAFT_306753	scaffold_53	304244	305977	0.491339	305125	307125	C374	deletion
DAPPUDRAFT_231239	scaffold_53	306058	308914	0.37338	305125	307125	C374	deletion
DAPPUDRAFT_250492	scaffold_53	725726	726240	1	725250	729875	C380	duplication
DAPPUDRAFT_306830	scaffold_54	605366	607022	0.843505	605625	607625	C02	deletion
DAPPUDRAFT_226463	scaffold_56	112595	113642	0.983748	111875	113625	C372	deletion
DAPPUDRAFT_306983	scaffold_58	377435	379827	0.235885	370500	378000	C291	duplication
DAPPUDRAFT_235905	scaffold_6	1496168	1505730	0.235226	1496750	1499000	C40	deletion
DAPPUDRAFT_251656	scaffold_60	132717	133736	0.844794	132875	139375	C02	duplication
DAPPUDRAFT_324152	scaffold_60	134951	135270	1	132875	139375	C02	duplication
DAPPUDRAFT_324154	scaffold_60	138181	139493	0.909992	132875	139375	C02	duplication
DAPPUDRAFT_251703	scaffold_60	294645	295027	1	294625	299125	C380	deletion
DAPPUDRAFT_108780	scaffold_60	707367	709547	1	696625	716000	C380	deletion
DAPPUDRAFT_251806	scaffold_60	721885	723111	0.399184	716000	722375	C380	deletion
DAPPUDRAFT_307311	scaffold_61	659446	660411	1	657625	662125	C39	deletion
DAPPUDRAFT_57150	scaffold_61	660828	662677	0.701299	657625	662125	C39	deletion
DAPPUDRAFT_215303	scaffold_64	104415	106426	0.708955	105000	107000	C372	deletion
DAPPUDRAFT_231329	scaffold_64	594364	595192	1	593875	596750	C372	deletion
DAPPUDRAFT_215335	scaffold_64	595548	596826	0.940486	593875	596750	C372	deletion
DAPPUDRAFT_67125	scaffold_648	21331	22261	1	20625	22500	C352	duplication
DAPPUDRAFT_307555	scaffold_65	202916	205977	0.108824	201125	203250	C355	deletion
DAPPUDRAFT_324915	scaffold_66	12937	24369	0.114776	12125	14250	C40	deletion
DAPPUDRAFT_324915	scaffold_66	12937	24369	0.136646	12750	14500	C376	duplication
DAPPUDRAFT_307619	scaffold_66	784614	789455	0.645455	785625	788750	C372	deletion
DAPPUDRAFT_109625	scaffold_67	143882	144624	1	143875	153625	C40	duplication
DAPPUDRAFT_200491	scaffold_67	144687	147570	1	143875	153625	C40	duplication
DAPPUDRAFT_109629	scaffold_67	154281	155860	1	148250	160875	C44	duplication
DAPPUDRAFT_307662	scaffold_67	165581	166723	0.742331	165875	168625	C40	deletion
DAPPUDRAFT_252871	scaffold_67	191975	194932	1	190375	195500	C40	deletion
DAPPUDRAFT_109640	scaffold_67	243721	245027	1	228750	247250	C376	duplication
DAPPUDRAFT_109640	scaffold_67	243721	245027	1	236750	246875	C40	deletion
DAPPUDRAFT_109657	scaffold_67	367443	368803	1	365000	369375	C40	deletion
DAPPUDRAFT_109657	scaffold_67	367443	368803	1	365250	372375	C376	duplication
DAPPUDRAFT_109662	scaffold_67	383004	384459	0.51238	382000	383750	C40	deletion
DAPPUDRAFT_325128	scaffold_67	435012	435569	1	430375	435875	C40	duplication
DAPPUDRAFT_252952	scaffold_67	493489	493975	1	492750	494125	C40	deletion
DAPPUDRAFT_325158	scaffold_67	506559	507208	1	504750	507500	C40	deletion
DAPPUDRAFT_252967	scaffold_67	540347	541975	0.247081	531875	540750	C40	deletion
DAPPUDRAFT_325166	scaffold_67	556192	556570	1	552750	556625	C40	duplication
DAPPUDRAFT_200500	scaffold_67	708790	712559	0.877919	709250	713750	C251	deletion
DAPPUDRAFT_200500	scaffold_67	708790	712559	0.877919	709250	713750	C355	deletion
DAPPUDRAFT_325222	scaffold_68	165832	166154	1	157875	166625	C34	duplication
DAPPUDRAFT_325284	scaffold_68	649865	650778	1	648000	655250	C291	deletion
DAPPUDRAFT_227119	scaffold_69	171434	175366	0.33452	165375	172750	C21	duplication
DAPPUDRAFT_325343	scaffold_69	480564	483018	0.0578883	482875	490625	C151	deletion
DAPPUDRAFT_307872	scaffold_7	1545740	1548641	0.134483	1548250	1550125	C02	deletion
DAPPUDRAFT_299659	scaffold_71	475965	478160	0.186418	477750	482000	C37	duplication
DAPPUDRAFT_253625	scaffold_71	479650	481340	1	477750	482000	C37	duplication
DAPPUDRAFT_227314	scaffold_74	466329	469252	0.513689	467750	469750	C372	deletion
DAPPUDRAFT_308091	scaffold_74	469597	470456	0.177156	467750	469750	C372	deletion
DAPPUDRAFT_325978	scaffold_75	183359	183800	1	178625	186125	C40	deletion
DAPPUDRAFT_325978	scaffold_75	183359	183800	1	179000	186375	C376	duplication
DAPPUDRAFT_325978	scaffold_75	183359	183800	1	179750	186625	C170	deletion
DAPPUDRAFT_188962	scaffold_75	422515	427471	0.72553	423875	429750	C376	duplication
DAPPUDRAFT_188962	scaffold_75	422515	427471	0.498486	425000	429125	C40	deletion
DAPPUDRAFT_227378	scaffold_75	428312	429742	1	423875	429750	C376	duplication
DAPPUDRAFT_227378	scaffold_75	428312	429742	0.56823	425000	429125	C40	deletion
DAPPUDRAFT_59155	scaffold_78	53004	75989	0.146798	71625	75000	C291	duplication
DAPPUDRAFT_189031	scaffold_79	423443	424131	1	421374	424500	C02	deletion
DAPPUDRAFT_222061	scaffold_8	124235	125116	1	120875	137000	C151	duplication
DAPPUDRAFT_230475	scaffold_8	130791	131497	1	120875	137000	C151	duplication
DAPPUDRAFT_236607	scaffold_8	17255	17424	1	13500	27125	C151	deletion
DAPPUDRAFT_313075	scaffold_8	139353	143904	0.528132	141500	154875	C151	duplication
DAPPUDRAFT_313077	scaffold_8	147601	150169	1	141500	154875	C151	duplication
DAPPUDRAFT_236651	scaffold_8	183024	186455	1	179000	196875	C151	duplication
DAPPUDRAFT_222086	scaffold_8	202919	204928	1	197375	208875	C151	duplication
DAPPUDRAFT_313322	scaffold_8	1983081	1986181	0.296225	1982750	1984000	C378	deletion
DAPPUDRAFT_308439	scaffold_8	2020938	2022362	0.60506	2021500	2024125	C372	deletion
DAPPUDRAFT_308455	scaffold_8	755992	761823	0.192796	760125	761250	C251	deletion
DAPPUDRAFT_236626	scaffold_8	92684	103909	0.901996	92750	102875	C151	duplication
DAPPUDRAFT_59321	scaffold_80	65881	66373	1	60625	67875	C352	duplication
DAPPUDRAFT_308564	scaffold_80	66600	68898	0.554636	60625	67875	C352	duplication
DAPPUDRAFT_308566	scaffold_80	83636	90556	0.21665	84625	86125	C352	deletion
DAPPUDRAFT_111136	scaffold_81	238917	239848	1	235625	240125	C376	duplication
DAPPUDRAFT_326638	scaffold_81	402806	403218	0.832117	402875	405875	C352	deletion
DAPPUDRAFT_326639	scaffold_81	404672	405478	1	402875	405875	C352	deletion
DAPPUDRAFT_308593	scaffold_81	427013	427913	1	426750	453000	C352	deletion
DAPPUDRAFT_59467	scaffold_81	445874	447603	1	426750	453000	C352	deletion
DAPPUDRAFT_111163	scaffold_81	472004	474304	1	469250	478500	C352	deletion
DAPPUDRAFT_326562	scaffold_81	10170	11392	0.474201	9375	10750	C380	duplication
DAPPUDRAFT_308626	scaffold_82	512086	514040	1	506500	515500	C291	deletion
DAPPUDRAFT_308612	scaffold_82	520208	520932	1	515500	522250	C291	deletion
DAPPUDRAFT_231471	scaffold_82	527503	528158	1	526125	541250	C291	deletion
DAPPUDRAFT_93300	scaffold_82	528465	529321	1	526125	541250	C291	deletion
DAPPUDRAFT_59524	scaffold_82	529856	531255	1	526125	541250	C291	deletion
DAPPUDRAFT_201342	scaffold_82	535660	541759	0.91653	526125	541250	C291	deletion
DAPPUDRAFT_93300	scaffold_82	528465	529321	1	526999	533625	C02	deletion
DAPPUDRAFT_231471	scaffold_82	527503	528158	1	526999	533625	C02	deletion
DAPPUDRAFT_59524	scaffold_82	529856	531255	1	526999	533625	C02	deletion
DAPPUDRAFT_201342	scaffold_82	535660	541759	0.0628075	541375	544875	C291	deletion
DAPPUDRAFT_255354	scaffold_85	89646	90551	0.667035	88875	90250	C376	deletion
DAPPUDRAFT_201511	scaffold_85	95370	96320	1	90625	96375	C40	deletion
DAPPUDRAFT_327147	scaffold_87	313039	318085	0.289197	316625	326625	C251	duplication
DAPPUDRAFT_111681	scaffold_87	322455	323397	1	316625	326625	C251	duplication
DAPPUDRAFT_336152	scaffold_877	10739	11564	1	10375	12875	C187	deletion
DAPPUDRAFT_313541	scaffold_9	764648	765582	1	761375	766000	C280	duplication
DAPPUDRAFT_309150	scaffold_90	425469	428443	0.149008	427999	430125	C02	deletion
DAPPUDRAFT_309158	scaffold_90	492706	493359	1	492625	495125	C372	deletion
DAPPUDRAFT_327424	scaffold_90	493663	495321	0.881714	492625	495125	C372	deletion
DAPPUDRAFT_112047	scaffold_91	143824	144770	0.582011	135625	144375	C291	duplication
DAPPUDRAFT_256564	scaffold_94	421632	421941	1	419375	423125	C284	duplication
DAPPUDRAFT_256740	scaffold_96	128415	129125	1	126250	130500	C291	duplication
DAPPUDRAFT_328029	scaffold_98	51213	51904	0.402899	51625	54750	C155	deletion
