# Supplementary material for: Accelerated rates of large-scale mutations in the presence of copper and nickel
Source: HighWire-hosted journal article supplement (doi:10.1101/gr.234724.118), 2018-11-28
Supplement: Supplemental_Table_S4.xlsx [file Supplemental_Table_S4.xlsx]

## Sheet: TableS4
Supplemental Table S4. PCR amplification was used to verify the presence and absence (P/A) of a subset of CNVs, testing with both the MA line with the CNV and one MA line without the CNV. This included five loci that did not pass filtering where we expected no CNVs to occur, which were filtered either due to having low overall read coverage or due to increasing the number of samples in our pairwi…
Scaffold	Primer Start	Primer End	CNV Start	CNV End	Mutant (P)	Control (A)	Forward Primer	Reverse Primer	(P/A) validated?
scaffold_8	1981902	1984367	1982750	1984000	C378	C07	AAGCTGGGCCTTATCGACAGC	CCGAAGTGTTTCWCGTCAAGAGTTCG	yes
scaffold_10	419180	433231	425000	432000	C40	C18,C44	TCCACCATTTTCATGGTGACCG	TGGTGGTGTAGTAACTCGGGGC	no
scaffold_10	767544	790172	771375	776875	C40	C18,C44	ATYTGACGTCATTTGCGCTAGC	GTAACTCTGYGACTTGAGTCAGAGC	yes
scaffold_10	796020	808257	798625	806750	C40	C18,C44	GCTTAAGTTCGCGGTGATACG	TTGCCACTGGATCTTATCCG	yes
scaffold_10	1120484	1134728	1122750	1127500	C40	C18,C44	CTGATTTCCCGCAAACAGAATCG	CCGGATTTTCAAGATGGGATACG	yes
scaffold_11	1041784	1058174	1047125	1050500	C372	C35	GCGACTCCTAACGAGATTTCTGC	GACTGTACGGGACGTATGTTGGC	yes
scaffold_16	1140713	1142717	1141250	1142250	C372	C07	AGTCGTCTTCGTGAGGTGAGC	GAAACTTGCTCTGGCAGGTACG	yes
scaffold_24	996224	1002433	999000	1000750	C40	C18,C44	GAGTTGAGGACAGTCTCATTCTGATCG	GCTTTCTCGCAAGAGGAACACG	no
scaffold_75	425474	426256	425000	429125	C40	C20	CTCTCTGAGTCGCTGCCTCT	AATTCGTTGCAAATCGACCTT	yes
scaffold_75	427401	428171	425000	429125	C40	C20	GGTTGGTGGTTCAACTTTGGT	TGGCAAGGCTTTTGTTTTAGG	yes
scaffold_88	139810	149039	140625	146000	C39	C18,C44	CCATCGTGAAGATATTRGCGGC	GGGAGCGTCTTSTTTACCCG	yes
scaffold_116	284603	295859	285625	288000	C376	C35	CCTCAATTTTGTCGCATGACG	GTGCAATTGCCTTCTTCTGGC	yes
scaffold_116	284603	295859	291000	293125	C40	C35	CCTCAATTTTGTCGCATGACG	GTGCAATTGCCTTCTTCTGGC	yes
scaffold_116	292144	295859	291000	293125	C40	C35	CTTTCTGGGATCATGAACGAGC	GTGCAATTGCCTTCTTCTGGC	yes
CNV calls that did not pass filtering.					Mutant (A)	Control (A)			(A) validated?	Filtering removal step
scaffold_3	2650246	2657596	2649251	2653250	C39	C18,C44	TGGCTTCYGTGCAGTACCTGGC	GTACATCTGACGGATTTTGGC	yes	increased sample comparisons
scaffold_18	621156	627239	624626	626375	C40	C18,C44	GGTGACGATATCTGATTCTGTTCG	CGAGTTGACCTTTTGAGCAACG	yes	increased sample comparisons
scaffold_40	195952	198016	196251	197125	C08	C18,C44	CATTTCCTGGCATCAAGACG	ATGGTTCTGCAACACAGTTCG	yes	increased sample comparisons
scaffold_41	625768	630594	629000	629875	C35	C18,C44	TTGCCAGTTCTTGGAGAGAACG	TGGCAGTGGCTAGACAACTATGC	yes	increased sample comparisons
scaffold_2	681616	701273	685876	697250	C40	C18,C44	ATTGGTTCCTTACAAGGTGCTGC	ACAGAATGCATTGATGTCCTACGC	no	low mean coverage (5x)
